# Supplementary material for: Direct synthesis of highly substituted thiophenes through copper(i)-catalyzed tandem reactions of alkylidenethiiranes with terminal alkynes
Source: Royal Society of Chemistry journal article supplement (doi:10.1039/b909284f), 2009-01-01

# Direct Synthesis of Highly Substituted Thiophenes through Copper(I)-Catalyzed Tandem Reactions of Alkylidenethiiranes with Terminal Alkynes

Yiping Zhang, Ming Bian, Weijun Yao, Jianming Gu and Cheng Ma\*

*Department of Chemistry, Zhejiang University, Hangzhou, 310027, China*  
*mcorg@zju.edu.cn*

## Contents

|                                                                                 |         |
|---------------------------------------------------------------------------------|---------|
| Experimental section                                                            | S2–S10  |
| General                                                                         | S2      |
| Synthesis of starting materials <b>1</b>                                        | S2      |
| Preparation and characterization data for <b>3a–n</b>                           | S2–S6   |
| Preparation and characterization data for <b>3o–3r</b> , and <b>5</b>           | S6–S8   |
| Procedure for the reaction of <b>3a</b> with NBS-FeCl <sub>3</sub>              | S8–S9   |
| Coupling reaction of <b>6</b> with <i>p</i> -tolylboronic acid to give <b>7</b> | S9      |
| Procedure for desulfonylation of <b>3o</b>                                      | S9      |
| References                                                                      | S10     |
| Spectra                                                                         | S11–S56 |

## Experimental section

### General:

All reactions were carried out under argon atmosphere. All reactions were monitored by thin-layer chromatography (TLC) on Merck silica gel plates (60F-254) using UV-light (254 and 365 nm). Flash chromatography was performed on silica gel (300-400 mesh) unless otherwise specified. NMR spectra were recorded on AM400 or AM500 (Bruker) instruments in CDCl<sub>3</sub> with TMS as the internal standard. High resolution mass spectral (HRMS) analyses were measured on a Bruker 7-tesla FT-ICR MS using ESI or EI techniques. Infrared spectra were recorded on a Nicolet 470 FT-IR Spectrometer. All the solid products were recrystallized from CH<sub>2</sub>Cl<sub>2</sub> and hexane, and melting points were uncorrected.

Unless otherwise mentioned, all chemicals were purchased from commercial sources, and not purified prior to use. Terminal alkynes **2g**<sup>1</sup>, **2m**<sup>2</sup> and **2n**<sup>3</sup> were prepared according to literature method.

### Synthesis of starting materials **1**:

Alkylidenethiiranes **1a–c** were prepared from substituted propargyl alcohol (50 mmol) according to literatures (Scheme 1).<sup>4</sup>

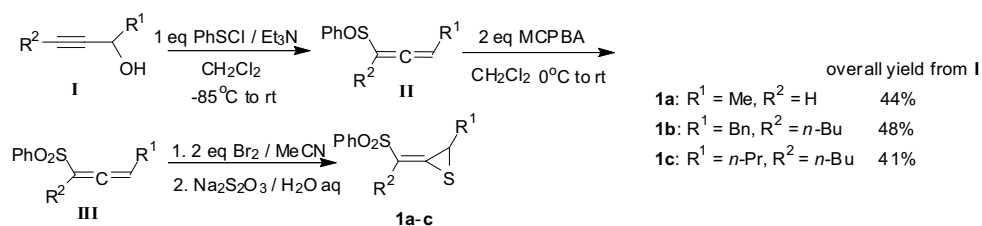

Scheme 1

### 2-(1-(Phenylsulfonyl)pentylidene)-3-propylthiirane **1c**:

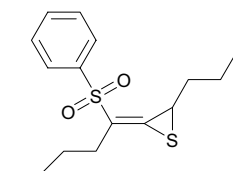

From dec-5-yn-4-ol (7.70 g, 50 mmol), 6.83g thiirane **1c** was obtained in 41 % yield over 3 steps. Pale yellow oil; <sup>1</sup>H-NMR (400 MHz, CDCl<sub>3</sub>, TMS) δ = 7.85 (d, *J* = 7.6 Hz, 2H), 7.61 (t, *J* = 7.6 Hz, 1H), 7.53 (t, *J* = 7.6 Hz, 2H), 3.76 (dd, *J* = 3.2, 6.0 Hz, 1H), 2.69–2.77 (m, 1H), 2.34 (t, *J* = 7.6 Hz, 2H), 1.54–1.65 (m, 2H), 1.37–1.50 (m, 3H), 1.19–1.27 (m, 2H), 1.03 (t, *J* = 7.6 Hz, 3H), 0.81 ppm (t, *J* = 7.6 Hz, 3H); <sup>13</sup>C-NMR (100 MHz, CDCl<sub>3</sub>, TMS) δ = 145.0, 140.6, 133.1, 129.1, 127.7, 124.1, 42.2, 37.0, 29.5, 29.2, 22.2, 21.6, 13.6, 13.3 ppm; IR (neat): ν 2958, 2873, 1707, 1446, 1316, 1153, 1083, 689 cm<sup>-1</sup>; ESI-HRMS: Calcd. for C<sub>16</sub>H<sub>22</sub>O<sub>2</sub>S<sub>2</sub>Na ([M+Na]<sup>+</sup>), 333.0953, Found, 333.0959.

### Preparation and characterization data for **3a–n**

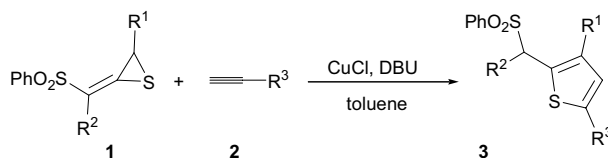

### General procedure

To a suspension of CuCl (9.9 mg, 0.1 mmol) and alkylidenethiirane **1a** (113 mg, 0.5mmol) in toluene (10 mL) was added terminal alkynes (0.75 mmol), DBU (7.6 mg, 0.05 mmol) under argon. The reaction temperature was then raised slowly to 50 °C, and the solution was stirred for additional several hours. The solvent was removed under reduced pressure and the resulting oil was purified by column chromatography using appropriate hexane-ethyl acetate solvent mixture to afford the products **3a–n**.

### 3-Methyl-5-phenyl-2-(phenylsulfonylmethyl)thiophene **3a**:

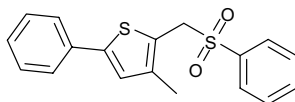

White solid; m.p. 94–96 °C; <sup>1</sup>H-NMR (500 MHz, CDCl<sub>3</sub>, TMS) δ = 7.75 (d, *J* = 7.5 Hz, 2H), 7.63 (t, *J* = 7.3 Hz, 1H), 7.50 (dd, *J* = 8.5 Hz, 4H), 7.35 (t, *J* = 7.5 Hz, 2H), 7.27 (t, *J* = 7.5 Hz, 1H), 6.97 (s, 1H), 4.45 (s, 2H), 1.84 (s, 3H) ppm; <sup>13</sup>C-NMR (125 MHz, CDCl<sub>3</sub>, TMS) δ = 144.8, 140.2, 138.0, 134.2, 133.9, 129.3, 129.1, 129.0, 128.1, 126.0, 125.8, 122.0, 56.2, 13.8 ppm; IR (KBr): ν 3066, 2926, 1449, 1308, 1137, 1085, 760, 747 cm<sup>-1</sup>; ESI-HRMS: Calcd. for C<sub>18</sub>H<sub>16</sub>O<sub>2</sub>SNa ([M+Na]<sup>+</sup>), 351.0484, Found, 351.0489.

### 3-Methyl-2-(phenylsulfonylmethyl)-5-p-tolylthiophene **3b**:

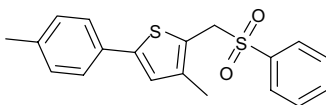

White solid; m.p. 122–123 °C; <sup>1</sup>H-NMR (400 MHz, CDCl<sub>3</sub>, TMS) δ = 7.75 (d, *J* = 7.6 Hz, 2H), 7.62 (t, *J* = 7.2 Hz, 1H), 7.48 (t, *J* = 7.6 Hz, 2H), 7.40 (d, *J* = 7.6 Hz, 2H), 7.15 (d, *J* = 8.4 Hz, 2H), 6.92 (s, 1H), 4.44 (s, 2H), 2.35 (s, 3H), 1.82 (s, 3H) ppm; <sup>13</sup>C-NMR (100 MHz, CDCl<sub>3</sub>, TMS) δ = 144.7, 139.8, 137.7, 137.7, 133.8, 130.9, 129.5, 129.0, 128.7, 125.4, 125.2, 121.1, 56.0, 21.1, 13.5 ppm; IR (KBr): ν 2961, 2907, 1448, 1306, 1165, 1137, 537, 807 cm<sup>-1</sup>; ESI-HRMS: Calcd. for C<sub>19</sub>H<sub>18</sub>O<sub>2</sub>S<sub>2</sub>Na ([M+Na]<sup>+</sup>), 365.0640, Found, 365.0641.

### 5-(4-Methoxyphenyl)-3-methyl-2-(phenylsulfonylmethyl)thiophene **3c**:

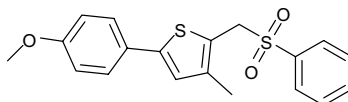

White solid; m.p. 137–138 °C; <sup>1</sup>H-NMR (400 MHz, CDCl<sub>3</sub>, TMS) δ = 7.75 (d, *J* = 7.6 Hz, 2H), 7.63 (t, *J* = 7.4 Hz, 1H), 7.48 (t, *J* = 7.8 Hz, 2H), 7.44 (d, *J* = 8.8 Hz, 2H), 6.88 (d, *J* = 8.8 Hz, 3H), 4.44 (s, 2H), 3.82 (s, 3H), 1.81 (s, 3H) ppm; <sup>13</sup>C-NMR (100 MHz, CDCl<sub>3</sub>, TMS) δ = 159.5, 144.6, 139.9, 137.8, 133.9, 129.1, 128.7, 126.9, 126.6, 124.7, 120.6, 114.3, 56.0, 55.3, 13.6 ppm; IR (KBr): ν 2961, 1607, 1517, 1298, 1253, 1134, 819, 529 cm<sup>-1</sup>; ESI-HRMS: Calcd. for C<sub>19</sub>H<sub>18</sub>O<sub>3</sub>S<sub>2</sub>Na ([M+Na]<sup>+</sup>), 381.0590, Found, 381.0594.

### 3-Methyl-5-(4-nitrophenyl)-2-(phenylsulfonylmethyl)thiophene **3d**:

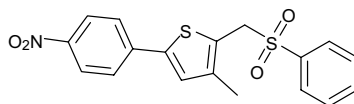

Yellow solid; m.p. 169–170 °C;  $^1\text{H-NMR}$  (400 MHz,  $\text{CDCl}_3$ , TMS)  $\delta$  = 8.21 (d,  $J$  = 8.8 Hz, 2H), 7.79 (d,  $J$  = 7.6 Hz, 2H), 7.63–7.69 (m, 3H), 7.53 (t,  $J$  = 7.6 Hz, 2H), 7.15 (s, 1H), 4.49 (s, 2H), 1.90 (s, 3H) ppm;  $^{13}\text{C-NMR}$  (100 MHz,  $\text{CDCl}_3$ , TMS)  $\delta$  = 146.8, 141.5, 140.6, 139.8, 137.7, 134.1, 129.2, 128.6, 128.2, 125.7, 125.0, 124.3, 77.3, 77.0, 76.7, 55.8, 13.6 ppm; **IR** (KBr):  $\nu$  3062, 2924, 1598, 1447, 1308, 1140, 1084, 741  $\text{cm}^{-1}$ ; **ESI-HRMS**: Calcd. for  $\text{C}_{18}\text{H}_{15}\text{NO}_4\text{S}_2\text{Na}$  ( $[\text{M}+\text{Na}]^+$ ), 396.0335, Found, 396.0341.

#### 5-(3-Aminophenyl)-3-methyl-2-(phenylsulfonylmethyl)thiophene 3e:

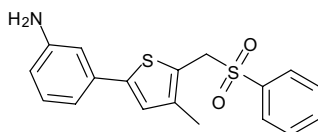

Pale yellow crystalline solid; m.p. 126–128 °C;  $^1\text{H-NMR}$  (400 MHz,  $\text{CDCl}_3$ , TMS)  $\delta$  = 7.74 (d,  $J$  = 7.2 Hz, 2H), 7.63 (t,  $J$  = 7.6 Hz, 1H), 7.49 (t,  $J$  = 7.8 Hz, 2H), 7.13 (t,  $J$  = 7.6 Hz, 1H), 6.92 (d,  $J$  = 6.0 Hz, 2H), 6.84 (t,  $J$  = 1.8 Hz, 1H), 6.61 (dd,  $J$  = 6.0, 2.0 Hz, 1H), 4.45 (s, 2H), 2.94 (bs, 2H), 1.82 ppm (s, 3H);  $^{13}\text{C-NMR}$  (100 MHz,  $\text{CDCl}_3$ , TMS)  $\delta$  = 146.7, 144.7, 139.7, 137.5, 134.5, 133.8, 129.7, 128.9, 128.6, 125.5, 121.3, 115.9, 114.5, 112.0, 55.9, 13.4 ppm; **IR** (neat):  $\nu$  3388, 2920, 1623, 1447, 1304, 1136, 743, 558  $\text{cm}^{-1}$ ; **ESI-HRMS**: Calcd. for  $\text{C}_{18}\text{H}_{17}\text{NO}_2\text{S}_2\text{Na}$  ( $[\text{M}+\text{Na}]^+$ ), 366.0593, Found, 366.0590.

#### 4-Methyl-5-(phenylsulfonylmethyl)-2,2'-bithiophene 3f:

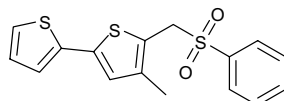

Pale yellow oil;  $^1\text{H-NMR}$  (400 MHz,  $\text{CDCl}_3$ , TMS)  $\delta$  = 7.76 (d,  $J$  = 7.2 Hz, 2H), 7.64 (t,  $J$  = 7.6 Hz, 1H), 7.50 (t,  $J$  = 7.4 Hz, 2H), 7.20 (d,  $J$  = 4.4 Hz, 1H), 7.11 (d,  $J$  = 2.8 Hz, 1H), 6.99 (dd,  $J$  = 0.8, 4.0 Hz, 1H), 6.82 (s, 1H), 4.42 (s, 2H), 1.80 (s, 3H) ppm;  $^{13}\text{C-NMR}$  (100 MHz,  $\text{CDCl}_3$ , TMS)  $\delta$  = 139.6, 137.7, 137.6, 136.6, 133.8, 129.0, 128.6, 127.7, 126.0, 124.6, 123.9, 121.1, 55.8, 13.3 ppm; **IR** (neat):  $\nu$  3066, 2922, 1732, 1447, 1308, 1138, 1084, 687  $\text{cm}^{-1}$ ; **ESI-HRMS**: Calcd. for  $\text{C}_{16}\text{H}_{14}\text{O}_2\text{S}_3\text{Na}$  ( $[\text{M}+\text{Na}]^+$ ), 357.0048, Found, 357.0045.

#### 2-(Furan-2-yl)-4-methyl-5-(phenylsulfonylmethyl)thiophene 3g:

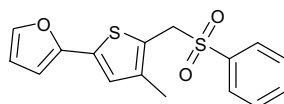

Pale yellow oil;  $^1\text{H-NMR}$  (400 MHz,  $\text{CDCl}_3$ , TMS)  $\delta$  = 7.74 (d,  $J$  = 8.0 Hz, 2H), 7.63 (t,  $J$  = 6.9 Hz, 1H), 7.49 (t,  $J$  = 7.8 Hz, 2H), 7.37 (s, 1H), 6.89 (s, 1H), 6.41–6.46 (m, 2H), 4.43 (s, 2H), 1.79 (s, 3H) ppm;  $^{13}\text{C-NMR}$  (100 MHz,  $\text{CDCl}_3$ , TMS)  $\delta$  = 148.7, 141.7, 139.5, 137.6, 133.8, 129.0, 128.6, 124.8, 121.0, 111.6, 105.4, 55.8, 13.3 ppm; **IR** (KBr):  $\nu$  3102, 2909, 1446, 1321, 1163, 741, 560, 524  $\text{cm}^{-1}$ ; **ESI-HRMS**: Calcd. for  $\text{C}_{16}\text{H}_{14}\text{O}_3\text{S}_2\text{Na}$  ( $[\text{M}+\text{Na}]^+$ ), 341.0277, Found, 342.0281.

**4-Methyl-5-(phenylsulfonylmethyl)-2-(pyridin-2-yl)-thiophene 3h:**

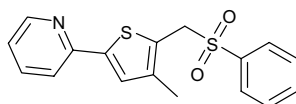

Pale yellow crystalline solid; m.p. 112–113 °C; <sup>1</sup>H-NMR (400 MHz, CDCl<sub>3</sub>, TMS) δ = 8.52 (d, *J* = 4.0 Hz, 1H), 7.75 (d, *J* = 7.6 Hz, 2H), 7.6–7.68 (m, 2H), 7.55 (d, *J* = 8.4 Hz, 1H), 7.48 (t, *J* = 7.8 Hz, 2H), 7.27 (s, 1H), 7.12–7.15 (dd, *J* = 1.6, 5.6 Hz, 1H), 4.48 (s, 2H), 1.87 (s, 3H) ppm; <sup>13</sup>C-NMR (100 MHz, CDCl<sub>3</sub>, TMS) δ = 151.8, 149.5, 144.6, 140.0, 137.8, 136.7, 134.0, 129.1, 128.7, 127.2, 124.6, 122.2, 118.7, 56.1, 13.7 ppm; IR (KBr): ν 3056, 2921, 1585, 1487, 1307, 1142, 777, 510 cm<sup>-1</sup>; ESI-HRMS: Calcd. for C<sub>17</sub>H<sub>15</sub>NO<sub>2</sub>S<sub>2</sub>Na ([M+Na]<sup>+</sup>), 352.0436, Found, 352.0431.

**5-Butyl-3-methyl-2-(phenylsulfonylmethyl)thiophene 3i:**

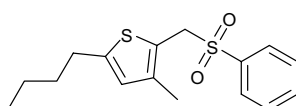

Pale yellow oil; <sup>1</sup>H-NMR (400 MHz, CDCl<sub>3</sub>, TMS) δ = 7.71 (d, *J* = 7.6 Hz, 2H), 7.62 (t, *J* = 7.4 Hz, 1H), 7.47 (t, *J* = 7.8 Hz, 2H), 6.43 (s, 1H), 4.38 (s, 2H), 2.69 (t, *J* = 7.6 Hz, 2H), 1.77 (s, 3H), 1.53–1.62 (m, 2H), 1.29–1.39 (m, 2H), 0.92 (t, *J* = 7.2 Hz, 3H) ppm; <sup>13</sup>C-NMR (100 MHz, CDCl<sub>3</sub>, TMS) δ = 146.6, 138.6, 137.8, 133.7, 128.9, 128.6, 127.0, 119.3, 55.9, 33.5, 29.6, 21.9, 13.7, 13.4 ppm; IR (neat): ν 2957, 2928, 2857, 1447, 1319, 1144, 744, 688 cm<sup>-1</sup>; ESI-HRMS: Calcd. for C<sub>16</sub>H<sub>20</sub>O<sub>2</sub>S<sub>2</sub>Na ([M+Na]<sup>+</sup>), 331.0797, Found, 331.0793.

**5-Cyclopropyl-3-methyl-2-(phenylsulfonylmethyl)thiophene 3j:**

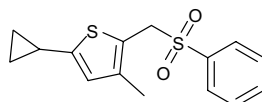

Pale yellow oil; <sup>1</sup>H-NMR (400 MHz, CDCl<sub>3</sub>, TMS) δ = 7.71 (d, *J* = 7.6 Hz, 2H), 7.63 (t, *J* = 7.6 Hz, 1H), 7.48 (t, *J* = 7.6 Hz, 2H), 6.41 (s, 1H), 4.36 (s, 2H), 1.94–1.98 (m, 1H), 1.73 (s, 3H), 0.92–0.97 (m, 2H), 0.62–0.67 (m, 2H) ppm; <sup>13</sup>C-NMR (100 MHz, CDCl<sub>3</sub>, TMS) δ = 149.4, 138.7, 137.8, 133.7, 128.9, 128.6, 125.5, 118.3, 55.9, 13.4, 11.1, 9.9 ppm; IR (neat): ν 2924, 1446, 1308, 1138, 1804, 1252, 742, 655 cm<sup>-1</sup>; ESI-HRMS: Calcd. for C<sub>15</sub>H<sub>16</sub>O<sub>2</sub>S<sub>2</sub>Na ([M+Na]<sup>+</sup>), 315.0484, Found, 315.0481.

**3-Methyl-5-(1-hydroxyethyl)-2-(phenylsulfonylmethyl)thiophene 3k:**

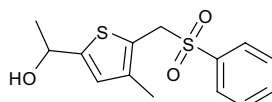

Pale yellow oil; <sup>1</sup>H-NMR (400 MHz, CDCl<sub>3</sub>, TMS) δ = 7.71 (d, *J* = 8.4 Hz, 2H), 7.63 (t, *J* = 7.2 Hz, 1H), 7.49 (t, *J* = 7.6 Hz, 2H), 6.63 (s, 1H), 4.98 (q, *J* = 6.8 Hz, 1H), 4.39 (s, 2H), 2.35 (bs, 1H), 1.80 (s, 3H), 1.51 ppm (d, *J* = 6.0 Hz, 3H); <sup>13</sup>C-NMR (100 MHz, CDCl<sub>3</sub>, TMS) δ = 150.6, 138.7, 137.7, 133.9, 129.0, 128.6, 125.9, 121.0, 66.0, 55.8, 25.1, 13.5 ppm; IR (neat): ν 3479, 2924, 1447, 1307, 1147, 1084, 746, 687 cm<sup>-1</sup>; ESI-HRMS: Calcd. for C<sub>14</sub>H<sub>16</sub>O<sub>3</sub>S<sub>2</sub>Na ([M+Na]<sup>+</sup>), 319.0433, Found, 319.0427.

### 5-Cyclohexenyl-3-methyl-2-(phenylsulfonylmethyl)thiophene 3l:

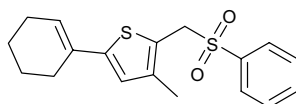

Flash chromatography was performed on neutral  $\text{Al}_2\text{O}_3$ ; colorless crystalline solid; m.p. 109–111 °C;  $^1\text{H-NMR}$  (400 MHz,  $\text{CDCl}_3$ , TMS)  $\delta$  = 7.72 (d,  $J$  = 8 Hz, 2H), 7.63 (t,  $J$  = 7.6 Hz, 1H), 7.48 (t,  $J$  = 7.6 Hz, 2H), 6.11 (s, 1H), 4.39 (s, 2H), 2.28–2.34 (m, 2H), 2.12–2.19 (m, 2H), 1.69–1.78 (m, 5H), 1.59–1.66 (m, 2H) ppm;  $^{13}\text{C-NMR}$  (100 MHz,  $\text{CDCl}_3$ , TMS)  $\delta$  = 147.3, 139.0, 137.9, 133.8, 130.7, 129.0, 128.7, 124.8, 123.8, 119.3, 56.0, 27.1, 25.6, 22.6, 22.0, 13.5 ppm; **IR** (neat):  $\nu$  2927, 2858, 1447, 1319, 1139, 1085, 745, 688  $\text{cm}^{-1}$ ; **ESI-HRMS**: Calcd. for  $\text{C}_{18}\text{H}_{20}\text{O}_2\text{S}_2\text{Na}$  ( $[\text{M}+\text{Na}]^+$ ), 355.0797, Found, 355.0801.

### 5-(2-Bromophenoxy)methyl-3-methyl-2-(phenylsulfonylmethyl)thiophene 3m:

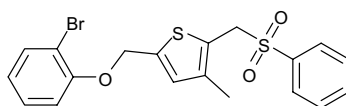

Pale yellow crystalline solid; m.p. 141–142 °C;  $^1\text{H-NMR}$  (400 MHz,  $\text{CDCl}_3$ , TMS)  $\delta$  = 7.69 (d,  $J$  = 7.6 Hz, 2H), 7.60 (t,  $J$  = 7.4 Hz, 1H), 7.55 (d,  $J$  = 7.6 Hz, 1H), 7.44 (t,  $J$  = 7.8 Hz, 2H), 7.25 (t,  $J$  = 7.6 Hz, 1H), 6.93 (d,  $J$  = 7.6 Hz, 1H), 6.87 (t,  $J$  = 7.8 Hz, 1H), 6.78 (s, 1H), 5.16 (s, 2H), 4.42 (s, 2H), 1.85 (s, 3H) ppm;  $^{13}\text{C-NMR}$  (100 MHz,  $\text{CDCl}_3$ , TMS)  $\delta$  = 154.4, 139.2, 138.7, 137.4, 133.8, 133.4, 129.3, 128.9, 128.5, 128.2, 123.1, 122.6, 114.2, 112.7, 65.9, 55.7, 13.4 ppm; **IR** (KBr):  $\nu$  2927, 1584, 1477, 1308, 1147, 1054, 747, 687  $\text{cm}^{-1}$ ; **ESI-HRMS**: Calcd. for  $\text{C}_{19}\text{H}_{17}\text{BrO}_3\text{S}_2\text{Na}$  ( $[\text{M}+\text{Na}]^+$ ), 458.9695, Found, 458.9700.

### 5-(2-Chloroacetoxy)-3-methyl-2-(phenylsulfonylmethyl)thiophene 3n:

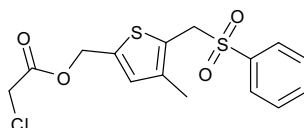

Colorless crystalline solid; m.p. 96–97 °C;  $^1\text{H-NMR}$  (400 MHz,  $\text{CDCl}_3$ , TMS)  $\delta$  = 7.72 (d,  $J$  = 8 Hz, 2H), 7.66 (t,  $J$  = 7.2 Hz, 1H), 7.51 (t,  $J$  = 7.6 Hz, 2H), 6.80 (s, 1H), 5.23 (s, 2H), 4.42 (s, 2H), 4.08 (s, 2H), 1.84 (s, 3H) ppm;  $^{13}\text{C-NMR}$  (100 MHz,  $\text{CDCl}_3$ , TMS)  $\delta$  = 166.9, 139.0, 137.6, 137.1, 134.0, 131.5, 129.1, 128.5, 124.3, 61.7, 55.6, 40.7, 13.4 ppm; **IR** (neat):  $\nu$  2958, 2924, 1755, 1447, 1309, 1150, 1084, 747  $\text{cm}^{-1}$ ; **ESI-HRMS**: Calcd. for  $\text{C}_{15}\text{H}_{15}\text{ClO}_4\text{S}_2\text{Na}$  ( $[\text{M}+\text{Na}]^+$ ), 380.9992, Found, 380.9987.

### Preparation and characterization data for 3o–3r, and 5

To a suspension of  $\text{CuCl}$  (9.9 mg, 0.1 mmol) and alkylideneethiiranes (0.5 mmol) in toluene (10 mL) was added terminal alkynes (0.75 mmol), DBU (7.6 mg, 0.05 mmol) under argon. The reaction mixture was then stirred at refluxing temperature for additional several hours. The solvent was removed under reduced pressure and the resulting oil was purified by column chromatography using appropriate hexane-ethyl acetate solvent mixtures to afford the products 3o–3r and 5, respectively.

### 3-Benzyl-5-phenyl-2-(1-(phenylsulfonyl)pentyl)thiophene 3o:

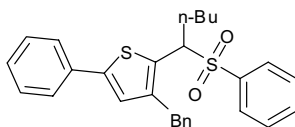

Alkylidenethiirane **1b** (179 mg, 0.5 mmol) was used. White solid; m.p. 144–145 °C;  $^1\text{H-NMR}$  (400 MHz,  $\text{CDCl}_3$ , TMS)  $\delta$  = 7.72 (d,  $J$  = 7.2 Hz, 2H), 7.63 (t,  $J$  = 7.4 Hz, 1H), 7.53 (d,  $J$  = 7.6 Hz, 2H), 7.47 (t,  $J$  = 7.8 Hz, 2H), 7.34 (t,  $J$  = 7.4 Hz, 2H), 7.15–7.28 (m, 4H), 6.93 (d,  $J$  = 7.2 Hz, 2H), 6.83 (s, 1H), 4.41 (dd,  $J$  = 3.2, 8.8 Hz, 1H), 3.37 (s, 2H), 2.36–2.47 (m, 1H), 1.98–2.08 (m, 1H), 1.16–1.27 (m, 3H), 0.95–1.06 (m, 1H), 0.79 (t,  $J$  = 7.0 Hz, 3H) ppm;  $^{13}\text{C-NMR}$  (100 MHz,  $\text{CDCl}_3$ , TMS)  $\delta$  = 144.4, 143.4, 139.3, 137.4, 133.7, 133.6, 129.1, 128.8, 128.8, 128.5, 128.4, 127.8, 126.3, 125.4, 124.8, 65.3, 33.9, 29.1, 28.7, 22.1, 13.6 ppm; **IR** (KBr):  $\nu$  2955, 2927, 1495, 1448, 1307, 1145, 727, 687  $\text{cm}^{-1}$ ; **ESI-HRMS**: Calcd. for  $\text{C}_{28}\text{H}_{28}\text{O}_2\text{S}_2\text{Na}$  ( $[\text{M}+\text{Na}]^+$ ), 483.1423, Found, 483.1429.

### 5-Phenyl-2-(1-(phenylsulfonyl)pentyl)-3-propylthiophene 3p:

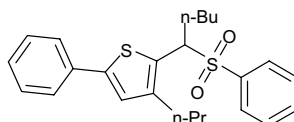

Alkylidenethiirane **1c** (155 mg, 0.5 mmol) was used. White solid; m.p. 73–75 °C;  $^1\text{H-NMR}$  (400 MHz,  $\text{CDCl}_3$ , TMS)  $\delta$  = 7.66 (d,  $J$  = 8.0 Hz, m, 2H), 7.57 (t,  $J$  = 8.0 Hz, 3H), 7.34–7.43 (m, 4H), 7.27 (t,  $J$  = 7.6 Hz, 1H), 6.93 (s, 1H), 4.40 (dd,  $J$  = 3.2, 8.4 Hz, 1H), 2.48–2.56 (m, 1H), 1.99–2.13 (m, 2H), 1.82–1.90 (m, 1H), 1.29–1.41 (m, 4H), 1.17–1.28 (m, 2H), 0.866 (t,  $J$  = 7.2 Hz, 3H), 0.78 (t,  $J$  = 7.2 Hz, 3H) ppm;  $^{13}\text{C-NMR}$  (100 MHz,  $\text{CDCl}_3$ , TMS)  $\delta$  = 145.2, 144.3, 137.5, 133.9, 133.6, 129.1, 128.9, 128.7, 128.3, 127.7, 125.5, 123.8, 65.4, 30.0, 29.0, 28.8, 23.3, 22.3, 13.9, 13.7 ppm; **IR** (neat):  $\nu$  2958, 1871, 1555, 1462, 1446, 1306, 1147, 689  $\text{cm}^{-1}$ ; **ESI-HRMS**: Calcd for  $\text{C}_{24}\text{H}_{28}\text{O}_2\text{S}_2\text{Na}$  ( $[\text{M}+\text{Na}]^+$ ), 435.1423, Found, 435.1429.

### 5-(4-Chlorophenyl)-2-(1-(phenylsulfonyl)pentyl)-3-propylthiophene 3q:

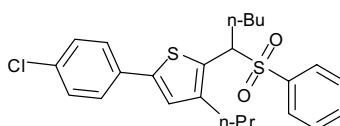

Alkylidenethiirane **1c** (155 mg, 0.5 mmol) was used. Flash chromatography was performed on neutral  $\text{Al}_2\text{O}_3$ ; white solid; m.p. 118–119 °C;  $^1\text{H NMR}$  (400 MHz,  $\text{CDCl}_3$ , TMS)  $\delta$  = 7.67 (d,  $J$  = 7.2 Hz, 2H), 7.58 (t,  $J$  = 7.2 Hz, 1H), 7.50 (d,  $J$  = 8.4 Hz, 2H), 7.43 (t,  $J$  = 8.0 Hz, 2H), 7.33 (d,  $J$  = 8.4 Hz, 2H), 6.91 (s, 1H), 4.39 (dd,  $J$  = 3.2, 8.8 Hz, 1H), 2.45–2.55 (m, 1H), 1.98–2.12 (m, 2H), 1.82–1.92 (m, 1H), 1.26–1.41 (m, 4H), 1.17–1.26 (m, 2H), 0.86 (t,  $J$  = 7.0 Hz, 3H), 0.78 (t,  $J$  = 7.4 Hz, 3H) ppm;  $^{13}\text{C NMR}$  (100 MHz,  $\text{CDCl}_3$ , TMS)  $\delta$  = 145.3, 142.9, 137.3, 133.6, 133.4, 132.4, 129.1, 129.0, 128.7, 126.7, 124.1, 65.2, 29.9, 29.0, 28.8, 23.2, 22.3, 13.8, 13.7 ppm; **IR** (neat):  $\nu$  2958, 2871, 1497, 1447, 1306, 1147, 1084, 823  $\text{cm}^{-1}$ ; **ESI-HRMS**: Calcd. for  $\text{C}_{24}\text{H}_{27}\text{ClO}_2\text{S}_2\text{Na}$  ( $[\text{M}+\text{Na}]^+$ ), 469.1033, Found, 469.1036.

### 5-(3-Ethynylphenyl)-3-methyl-2-(phenylsulfonylmethyl)thiophene **3r**:

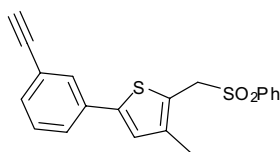

The reaction of alkylidenethiirane **1a** (113 mg, 0.5 mmol) and 1,3-Diethynylbenzene (3 eq, 189 mg, 1.5 mmol) afforded 125 mg of **3r** (71 %): Pale yellow solid; m.p. 110–111 °C; **<sup>1</sup>H-NMR** (400 MHz, CDCl<sub>3</sub>, TMS)  $\delta$  = 7.76 (d,  $J$  = 7.6 Hz, 2H), 7.64 (t,  $J$  = 7.8 Hz, 2H), 7.50 (t,  $J$  = 7.8 Hz, 3H), 7.39 (d,  $J$  = 7.6 Hz, 1H), 7.31 (t,  $J$  = 7.8 Hz, 1H), 6.98 (s, 1H), 4.46 (s, 2H), 3.11 (s, 1H), 1.85 (s, 3H) ppm; **<sup>13</sup>C NMR** (100 MHz, CDCl<sub>3</sub>, TMS)  $\delta$  = 143.3, 140.1, 137.7, 134.0, 133.9, 131.3, 129.1, 128.9, 128.7, 126.2, 126.0, 122.8, 122.4, 83.1, 77.7, 56.0, 13.6 ppm; **IR** (neat):  $\nu$  3291, 2922, 1597, 1447, 1308, 1159, 1085, 686 cm<sup>-1</sup>; **ESI-HRMS**: Calcd. for C<sub>20</sub>H<sub>16</sub>O<sub>2</sub>S<sub>2</sub>Na ([M+Na]<sup>+</sup>), 375.0484, Found, 375.0486.

### 1,3-Bis(4-methyl-5-(phenylsulfonylmethyl)thiophen-2-yl)benzene **5**:

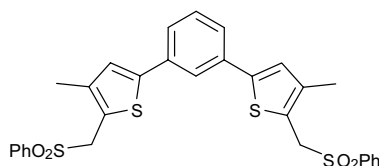

The reaction of alkylidenethiirane **1a** (113 mg, 0.5 mmol) with 1,3-diethynylbenzene (0.33eq, 20.8 mg, 0.165 mmol) afforded 61.9 mg of **5** (65 %, based on the amount of 1,3-diethynylbenzene): white solid; m.p. 196–197 °C; **<sup>1</sup>H-NMR** (400 MHz, CDCl<sub>3</sub>, TMS)  $\delta$  = 7.77 (d,  $J$  = 7.6 Hz, 4H), 7.66 (m, 3H), 7.51 (t,  $J$  = 7.8 Hz, 4H), 7.43 (d,  $J$  = 6.8 Hz, 2H), 7.35 (t,  $J$  = 3.6 Hz, 1H), 7.02 (s, 2H), 4.47 (s, 4H), 1.84 (s, 6H) ppm; **<sup>13</sup>C-NMR** (100 MHz, CDCl<sub>3</sub>, TMS)  $\delta$  = 143.9, 140.0, 137.8, 134.4, 134.0, 129.5, 129.1, 128.7, 126.1, 125.0, 122.8, 122.2, 56.0, 13.5 ppm; **IR** (neat):  $\nu$  2925, 1732, 1599, 1447, 1308, 1139, 742, 687 cm<sup>-1</sup>; **ESI-HRMS**: Calcd. for C<sub>30</sub>H<sub>26</sub>O<sub>4</sub>S<sub>4</sub>Na ([M+Na]<sup>+</sup>), 601.0607, Found, 601.0602.

### Procedure for the reaction of **3a** with NBS-FeCl<sub>3</sub><sup>5</sup>

To a solution of **3a** (164 mg, 0.5 mmol) in 5 mL CH<sub>2</sub>Cl<sub>2</sub> was added FeCl<sub>3</sub> (8.1 mg, 0.05 mmol), NBS (89 mg, 0.5 mmol) was added at 0 °C, and the reaction mixture was stirred for additional 1 hours in the ice-water bath. After complete consumption of **3a**, the solution was diluted with ethyl acetate (20 mL), washed with brine, and dried with MgSO<sub>4</sub>. The solvent was removed under reduced pressure and the resulting oil was purified by column chromatography using hexane-ethyl acetate solvent mixture to afford the product **6** as a pale yellow crystalline solid.

### 3-Bromo-4-methyl-2-phenyl-5-(phenylsulfonylmethyl)thiophene **6**:

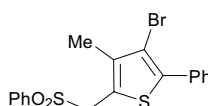

m.p. 146–148 °C; **<sup>1</sup>H-NMR** (400 MHz, CDCl<sub>3</sub>, TMS)  $\delta$  = 7.78 (d,  $J$  = 7.2 Hz, 2H), 7.67 (t,  $J$  = 7.2 Hz, 1H), 7.51–7.59 (m, 4H), 7.35–7.44 (m, 3H), 4.50 (s, 2H), 1.93 (s, 3H) ppm; **<sup>13</sup>C NMR** (100 MHz, CDCl<sub>3</sub>, TMS)  $\delta$  = 139.4, 139.1, 137.6, 134.2, 132.7, 129.2, 129.1, 128.7, 128.5, 128.5, 121.8, 111.0, 56.3, 14.7 ppm; **IR** (KBr):  $\nu$  3057, 2924, 1449, 1315, 1146, 1086, 748, 601 cm<sup>-1</sup>; **ESI-HRMS**: Calcd.



for  $C_{18}H_{15}BrO_2S_2Na$  ( $[M+Na]^+$ ), 428.9589, Found, 428.9594.

### Coupling reaction of **6** with *p*-tolylboronic acid

A Schlenk flask was charged with **6** (203 mg, 0.5 mmol), *p*-tolylboronic acid (136 mg, 1 mmol),  $K_3PO_4$  (424mg, 2 mmol),  $Pd(PPh_3)_4$  (57.8mg, 0.05 mmol). DMF (5 mL) was then added into the flask. The mixture was stirred and purged with argon for 2 min and then heated at 100 °C for 4 h. The reaction was allowed to cool to ambient temperature and diluted with 20 mL of  $Et_2O$ . After washed twice with  $H_2O$  (10mL), the organic solution was concentrated and purified by silica gel chromatography to give the product **7** as a pale yellow crystalline solid.

### 3-Methyl-5-phenyl-2-(phenylsulfonylmethyl)-4-*p*-tolylthiophene **7**:

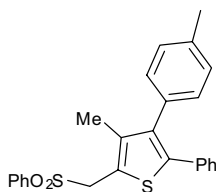

m.p. 172–173 °C;  $^1H$  NMR (400 MHz,  $CDCl_3$ , TMS)  $\delta$  = 7.81 (d,  $J$  = 8.0 Hz, 2H), 7.65 (t,  $J$  = 7.2 Hz, 1H), 7.52 (t,  $J$  = 7.6 Hz, 2H), 7.10–7.18 (m, 7H), 6.93 (d,  $J$  = 7.6 Hz, 2H), 4.52 (s, 2H), 2.35 (s, 3H), 1.64 (s, 3H) ppm;  $^{13}C$  NMR (100 MHz,  $CDCl_3$ , TMS)  $\delta$  = 139.4, 139.1, 137.6, 134.2, 132.7, 129.2, 129.1, 128.7, 128.5, 121.8, 111.0, 56.3, 14.7 ppm; IR (KBr):  $\nu$  3062, 2923, 1446, 1320, 1306, 1149, 1085, 752  $cm^{-1}$ ; ESI-HRMS: Calcd. for  $C_{25}H_{22}O_2S_2Na$  ( $[M+Na]^+$ ), 441.0953, Found, 441.0954.

### Procedure for desulfonylation of **3o**<sup>6</sup>

Into a Schlenk flask containing **3o** (230 mg, 0.5 mmol) in DMF (10 mL) at room temperature was added 10 mL of HOAc/NaOAc (1:1) buffer solution (8 mol/L). Magnesium turnings (182 mg, 7.5 mmol) were added in portions. The reaction mixture was stirred at room temperature for 24 hours followed by adding 20 mL water. The mixture was extracted with  $Et_2O$  ( $3 \times 20$  mL). The combined organic phase was washed with saturated  $NaHCO_3$  solution, brine, and dried with  $MgSO_4$ . The organic solution was concentrated and purified by silica gel chromatography to give the product **8** as pale yellow oil.

### 3-Benzyl-2-pentyl-5-phenylthiophene **8**:

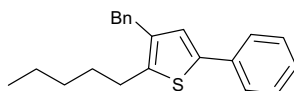

$^1H$  NMR (400 MHz,  $CDCl_3$ , TMS)  $\delta$  = 7.50 (d,  $J$  = 7.6 Hz, 2H), 7.28 (dd,  $J$  = 8.0 Hz, 4H), 7.17–7.22 (m, 4H), 6.95 (s, 1H), 3.89 (s, 2H), 2.76 (t,  $J$  = 7.6 Hz, 2H), 1.60–1.68 (m, 2H), 1.29–1.39 (m, 4H), 0.89 ppm (t,  $J$  = 6.8 Hz, 3H);  $^{13}C$  NMR (100 MHz,  $CDCl_3$ , TMS)  $\delta$  = 140.7, 140.0, 139.8, 136.6, 134.6, 128.7, 128.5, 128.4, 126.9, 126.0, 125.4, 125.3, 77.3, 77.0, 76.7, 34.3, 31.5, 31.4, IR (neat):  $\nu$  3026, 2927, 1601, 1495, 1453, 1030, 756, 699  $cm^{-1}$ ; EI-HRMS: Calcd. for  $C_{22}H_{24}S$ , 320.1599, Found, 320.1602.

## Reference

1. A. G. Mal'kina, L. Brandsma, S. F. Vasilevsky and B. A. Trofimov, *Synthesis*, 1996, 589.
2. H. Ishii, S. Ohta, H. Nishioka, N. Hayashida and T. Harayama, *Chem. Pharm. Bull.*, 1993, **41**, 1166.
3. S. Yamazaki, K. Yamada, T. Otsubo, M. Haruna, E. Kutsuwa and H. Tamura, *Chem. Commun.*, 2001, 69.
4. (a) S. Ma, H. Ren and Q. Wei, *J. Am. Chem. Soc.*, 2003, **125**, 4817. (b) C. Zhou, C. Fu and S. Ma, *Angew. Chem. Int. Ed.*, 2007, **46**, 4379. (c) C. Mukai, T. Hirose, S. Teramoto and S. Kitagaki, *Tetrahedron*, 2005, **61**, 10983.
5. Y. Zhang, K. Shibatomi and H. Yamamoto, *Synlett*, 2005, 2837.
6. C. Ni and J. Hu, *Tetrahedron Lett.*, 2005, **46**, 8273.

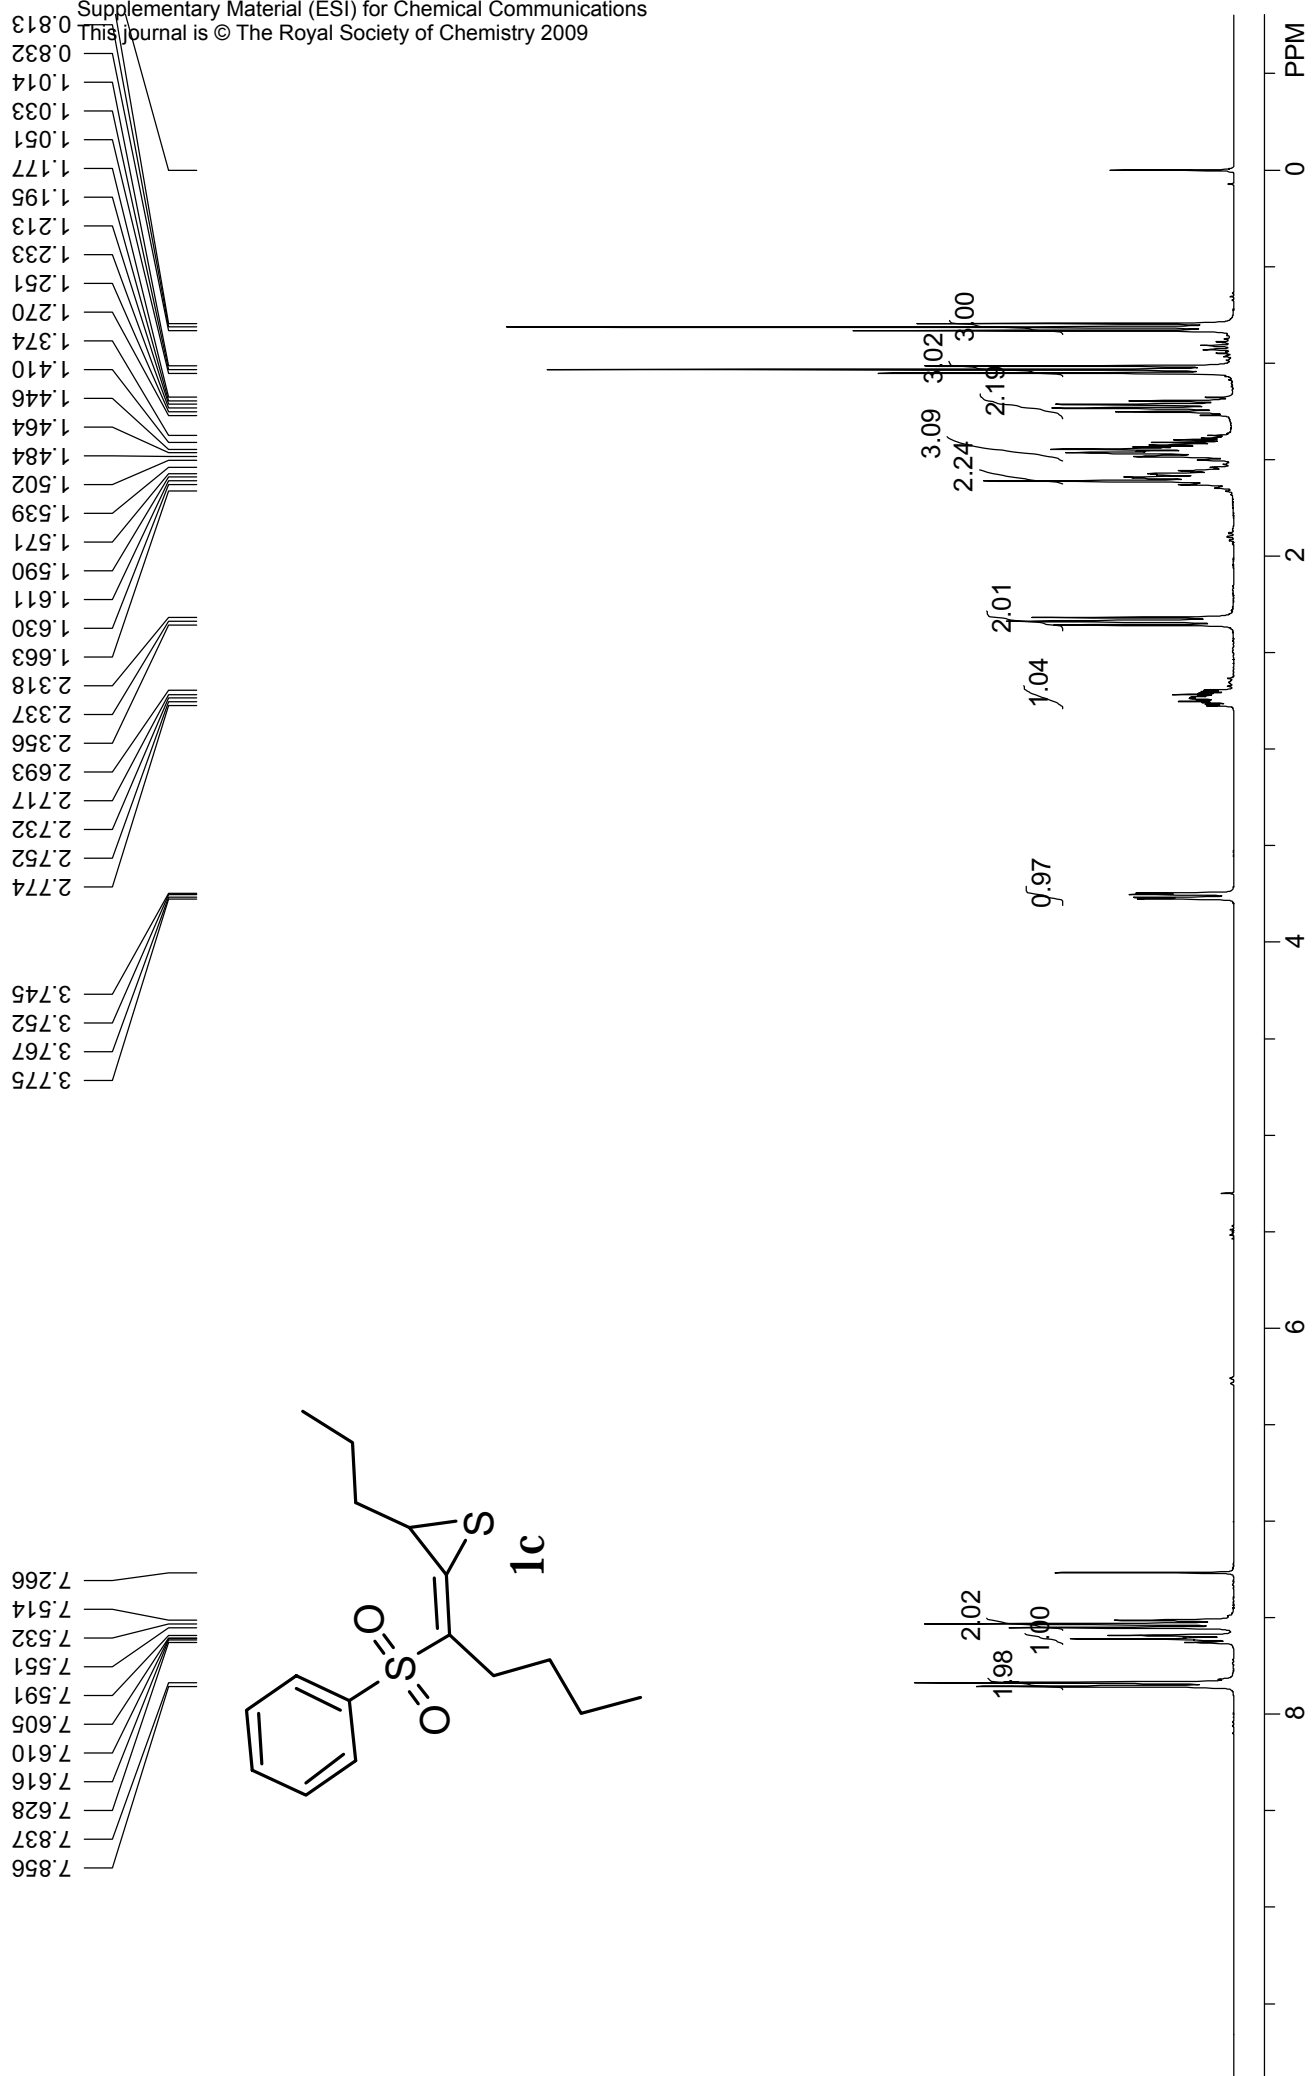

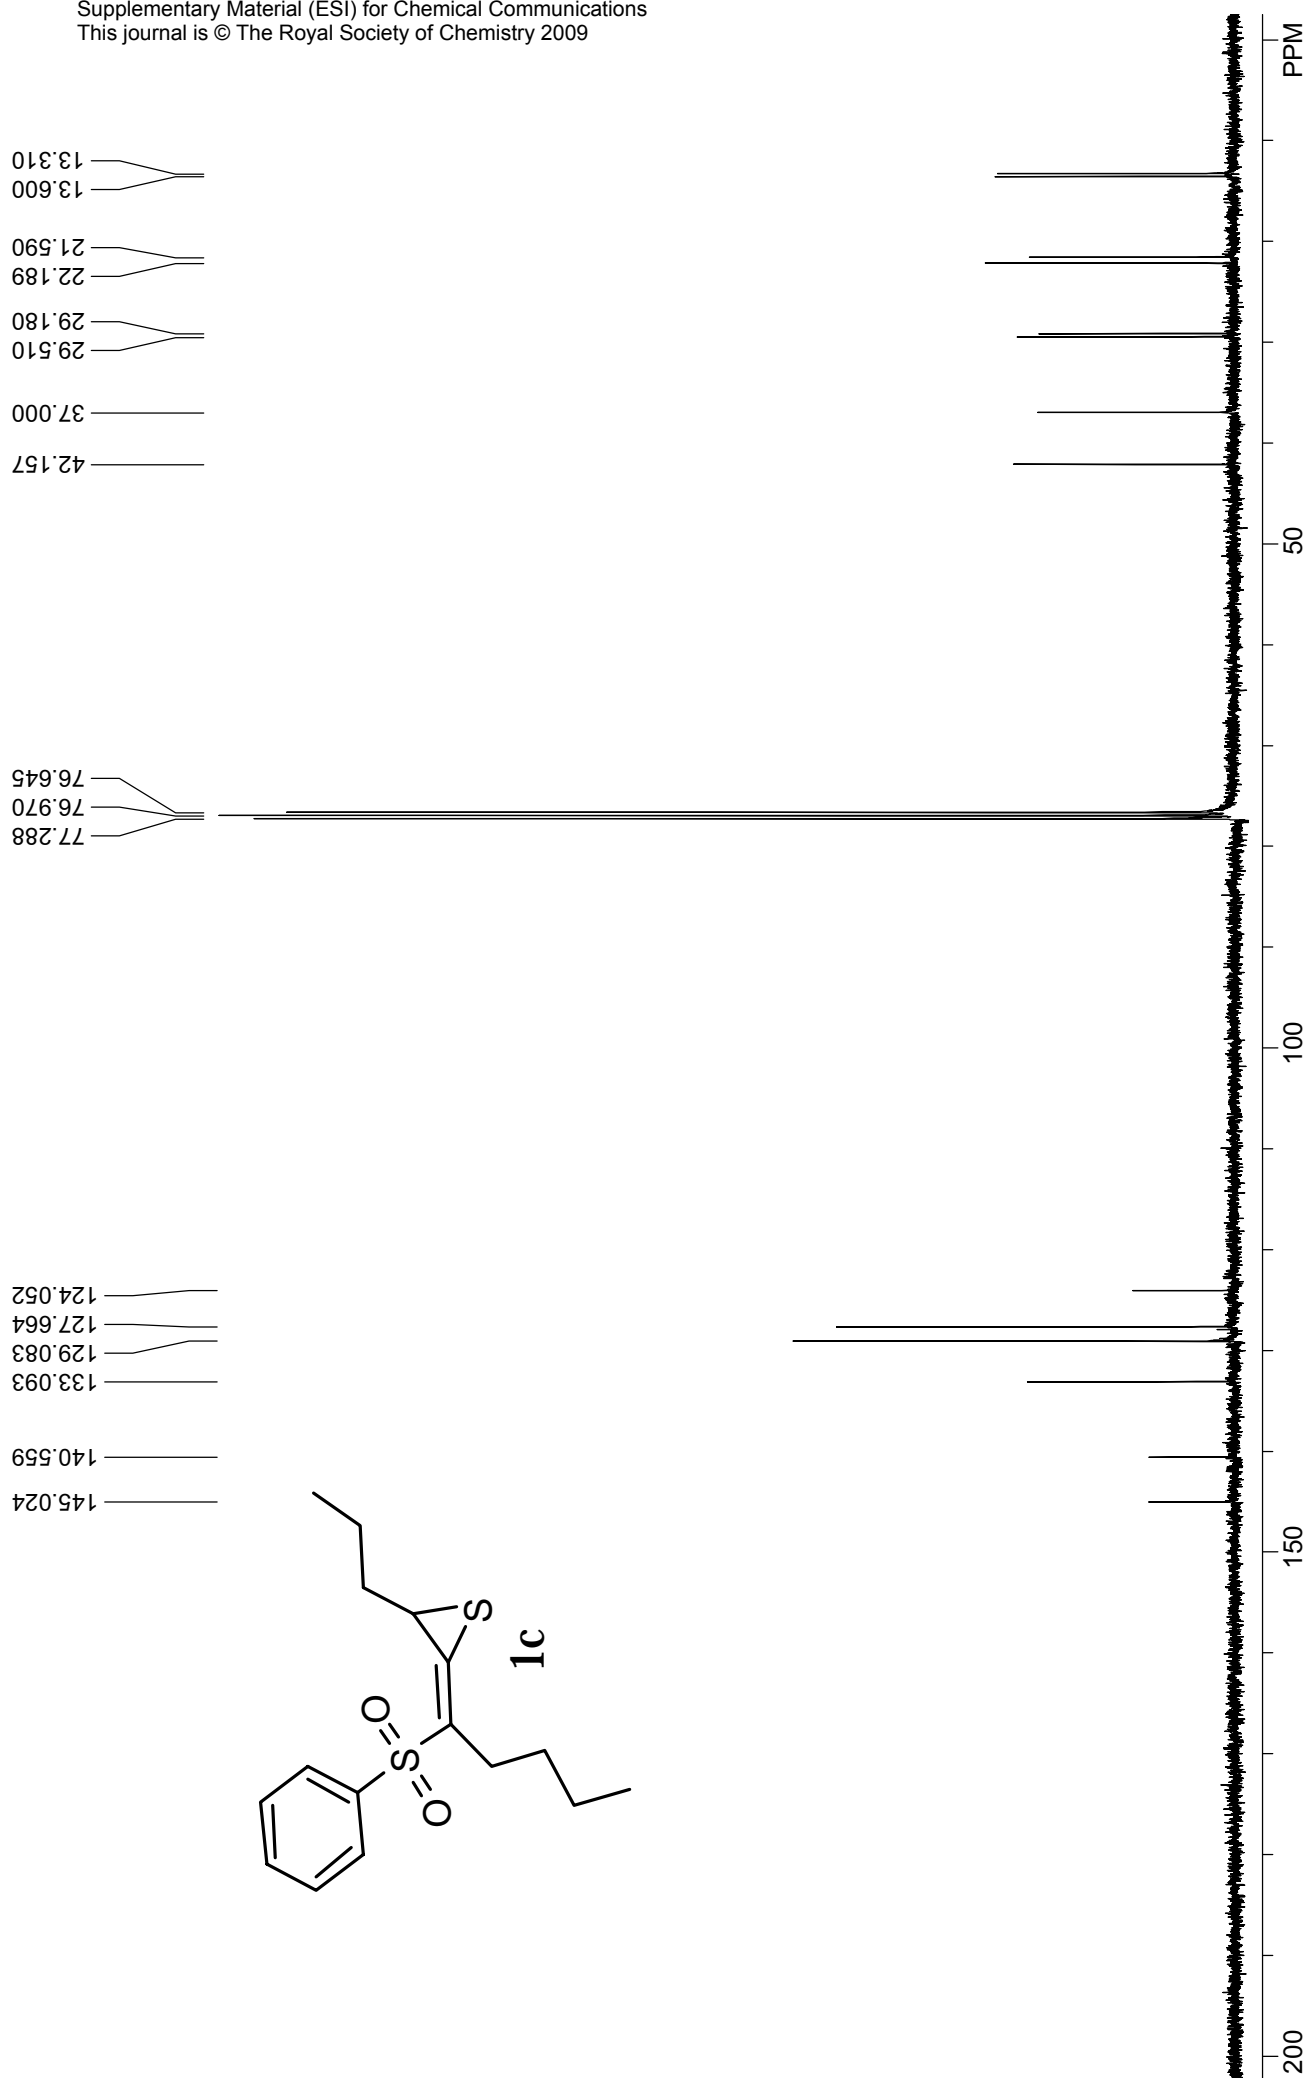

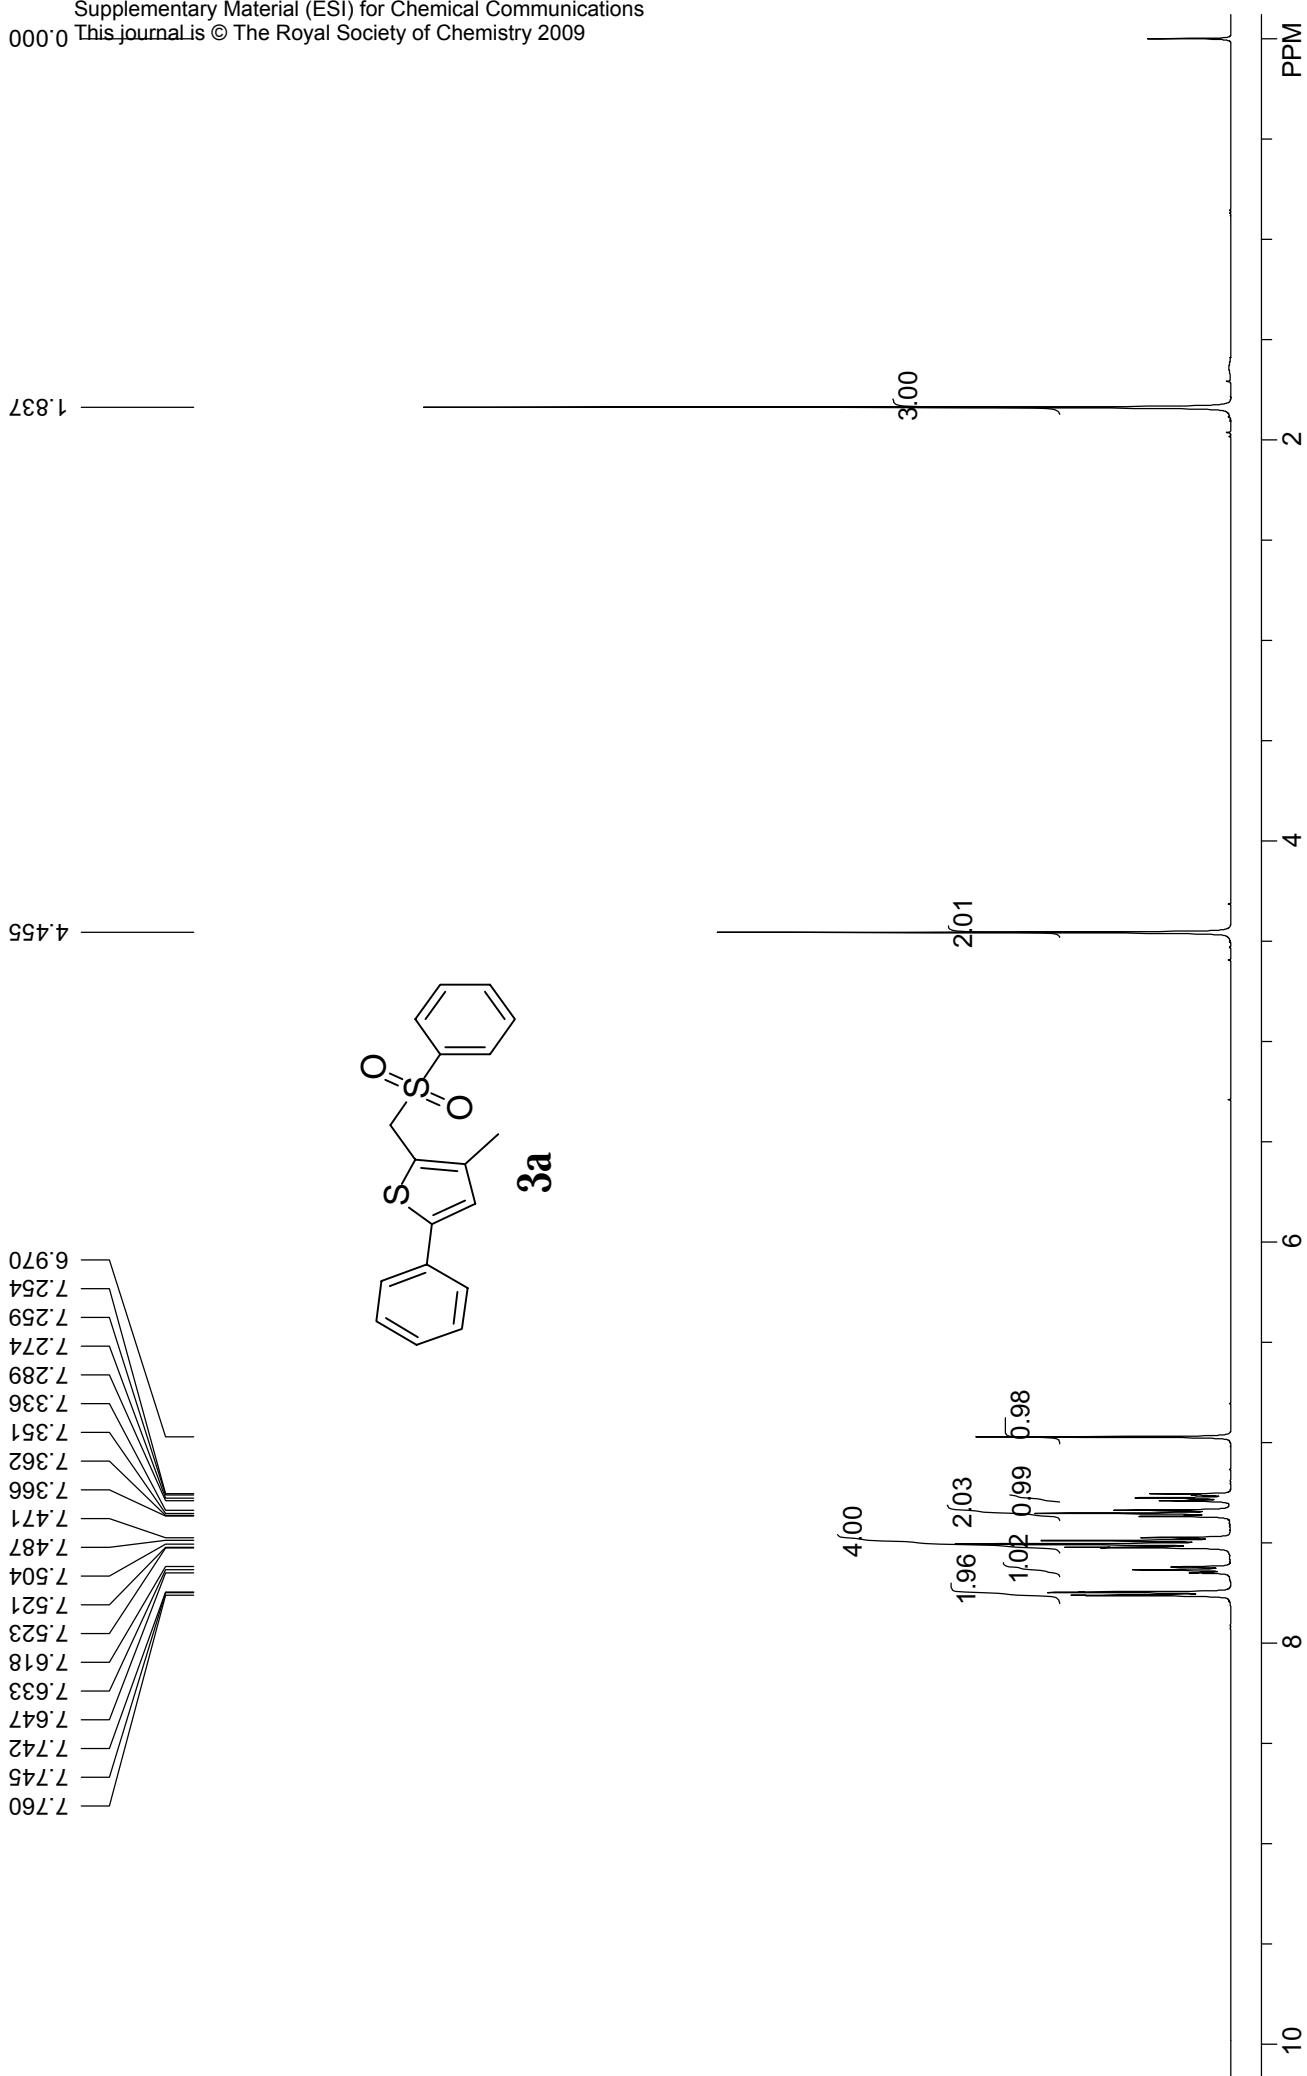

13.827

56.236

77.514  
77.257  
77.009

144.826  
140.206  
137.988  
134.170  
133.923  
129.317  
129.114  
128.957  
128.056  
125.958  
125.810  
121.993

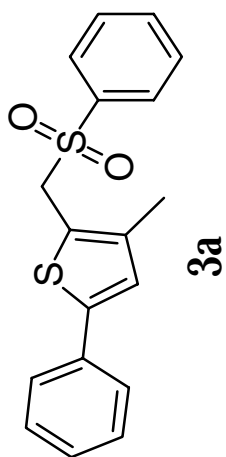

3a

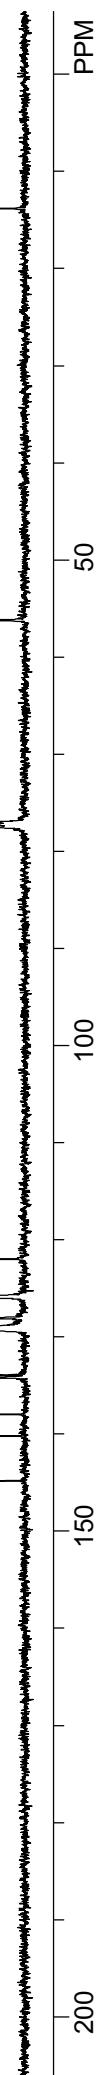

0.000

1.636  
1.825

2.345

4.441

7.756  
7.737  
7.640  
7.622  
7.604  
7.495  
7.477  
7.457  
7.411  
7.392  
7.250  
7.162  
7.141  
6.919

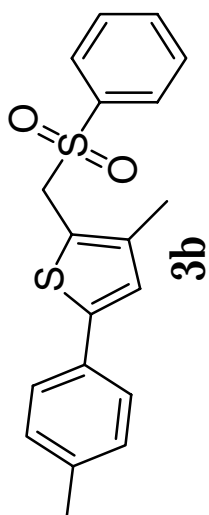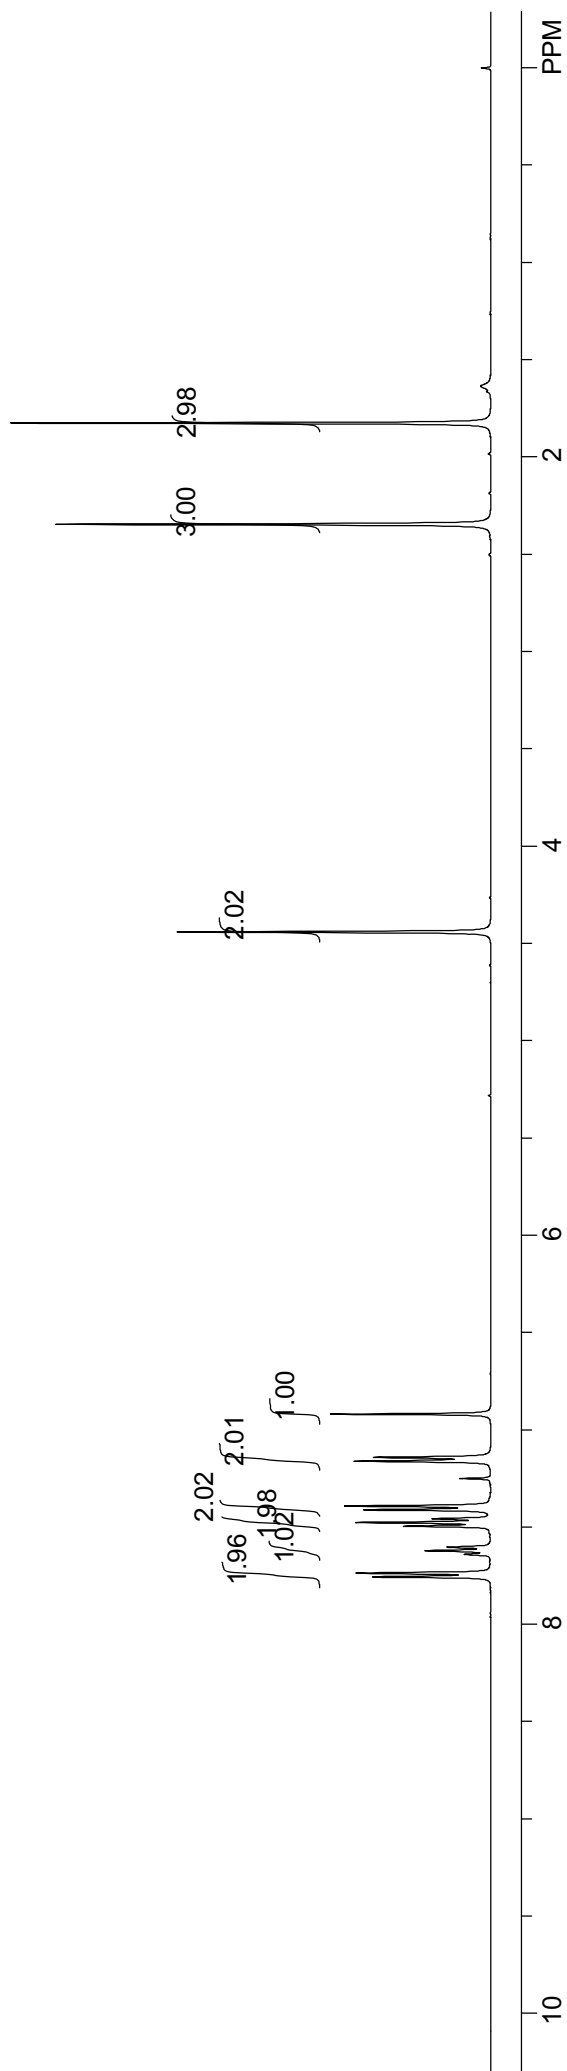

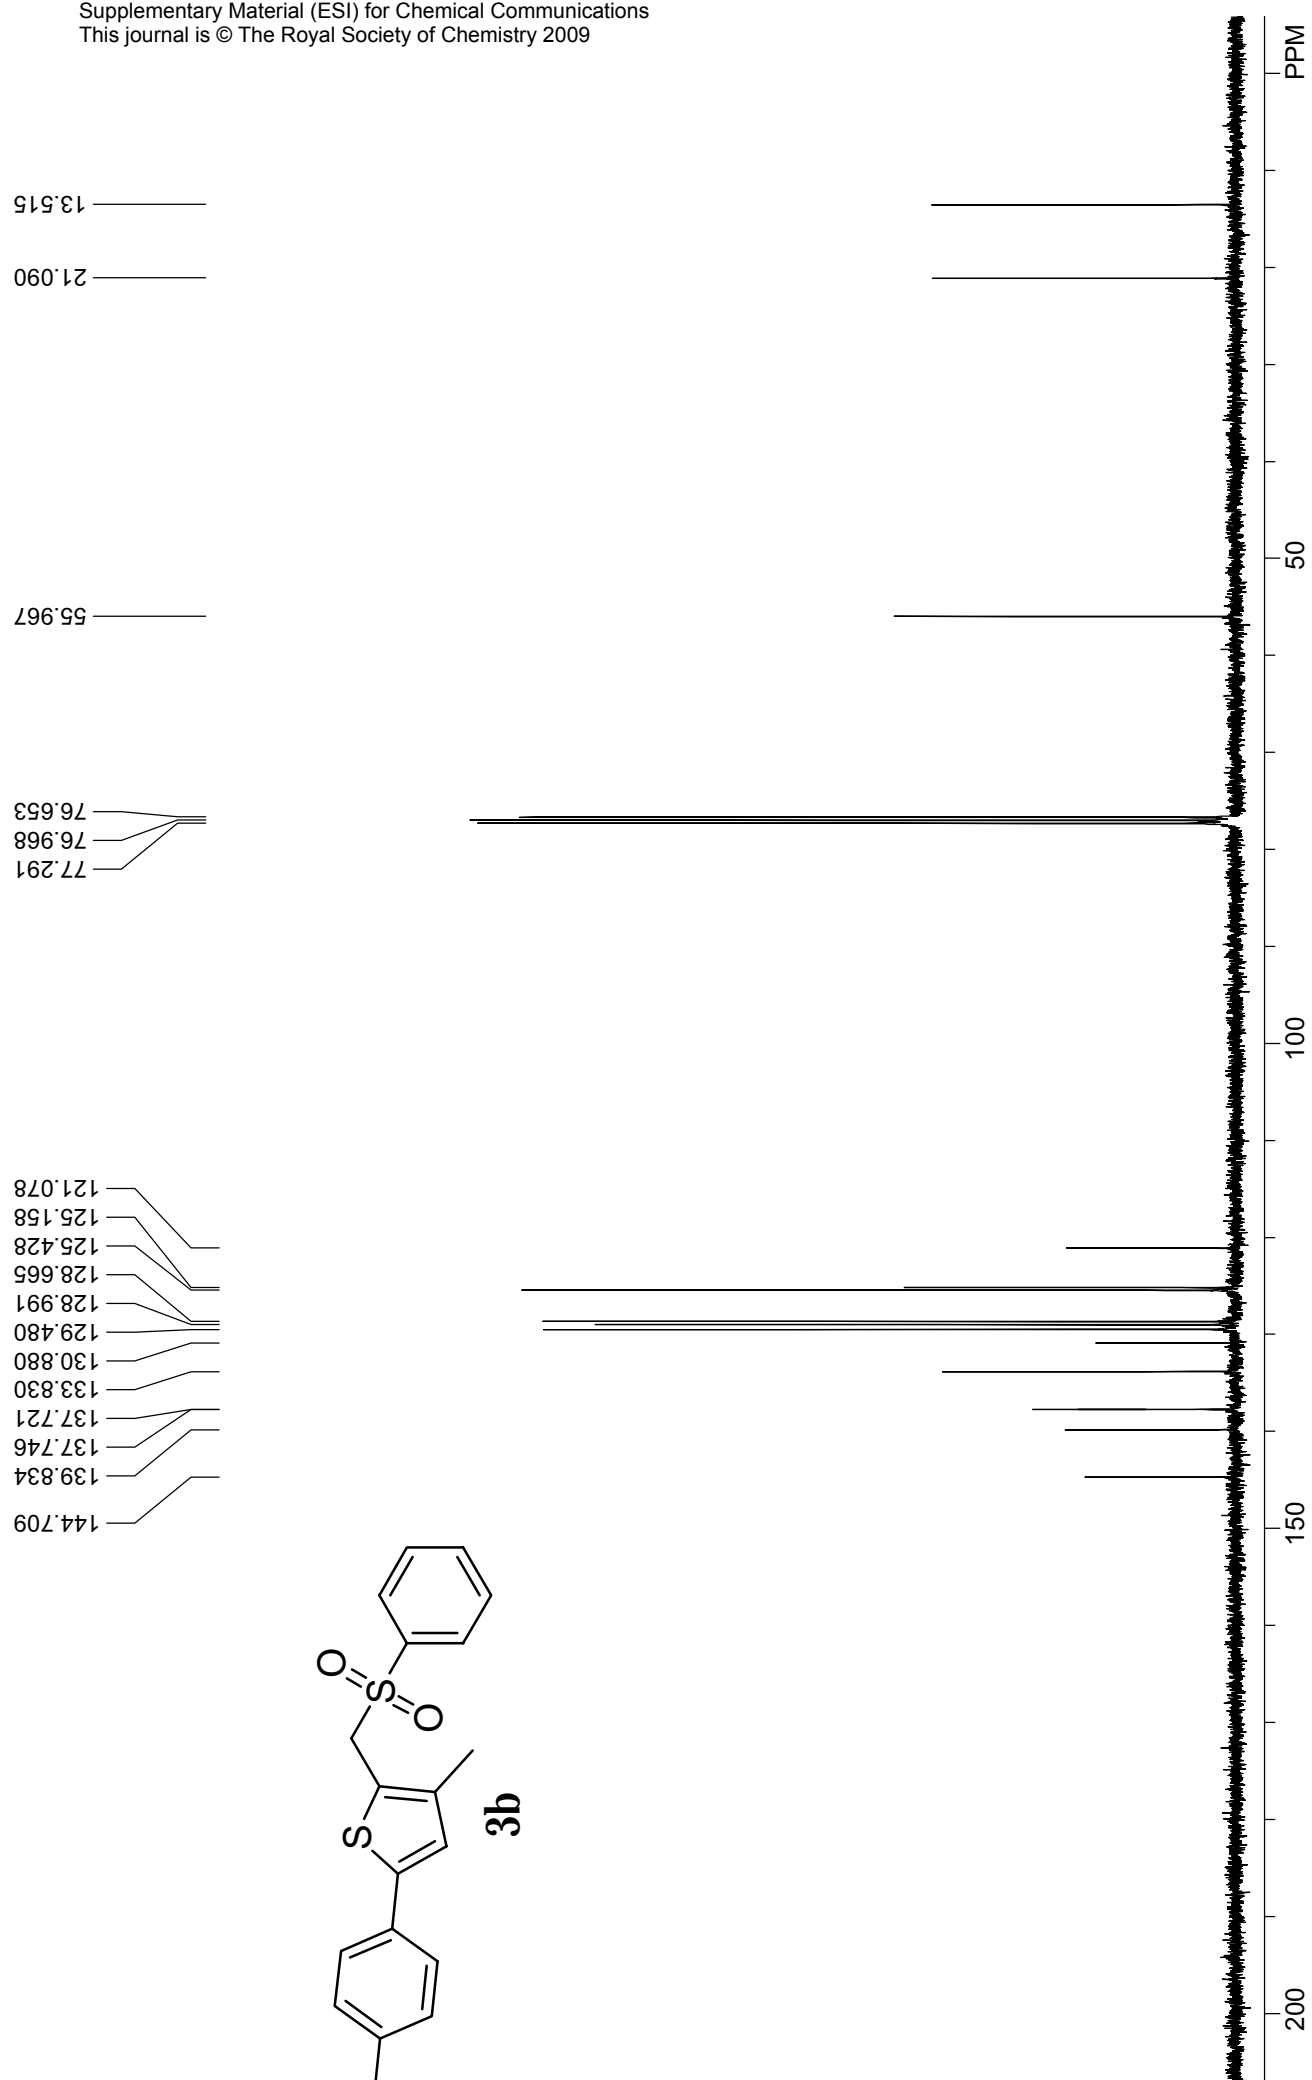



-0.000

1.636  
1.813

3.815

4.437

5.286

6.850  
6.870  
6.892  
7.257  
7.425  
7.447  
7.463  
7.482  
7.502  
7.608  
7.627  
7.645  
7.742  
7.761

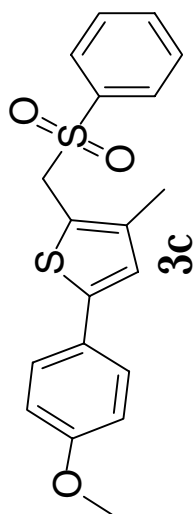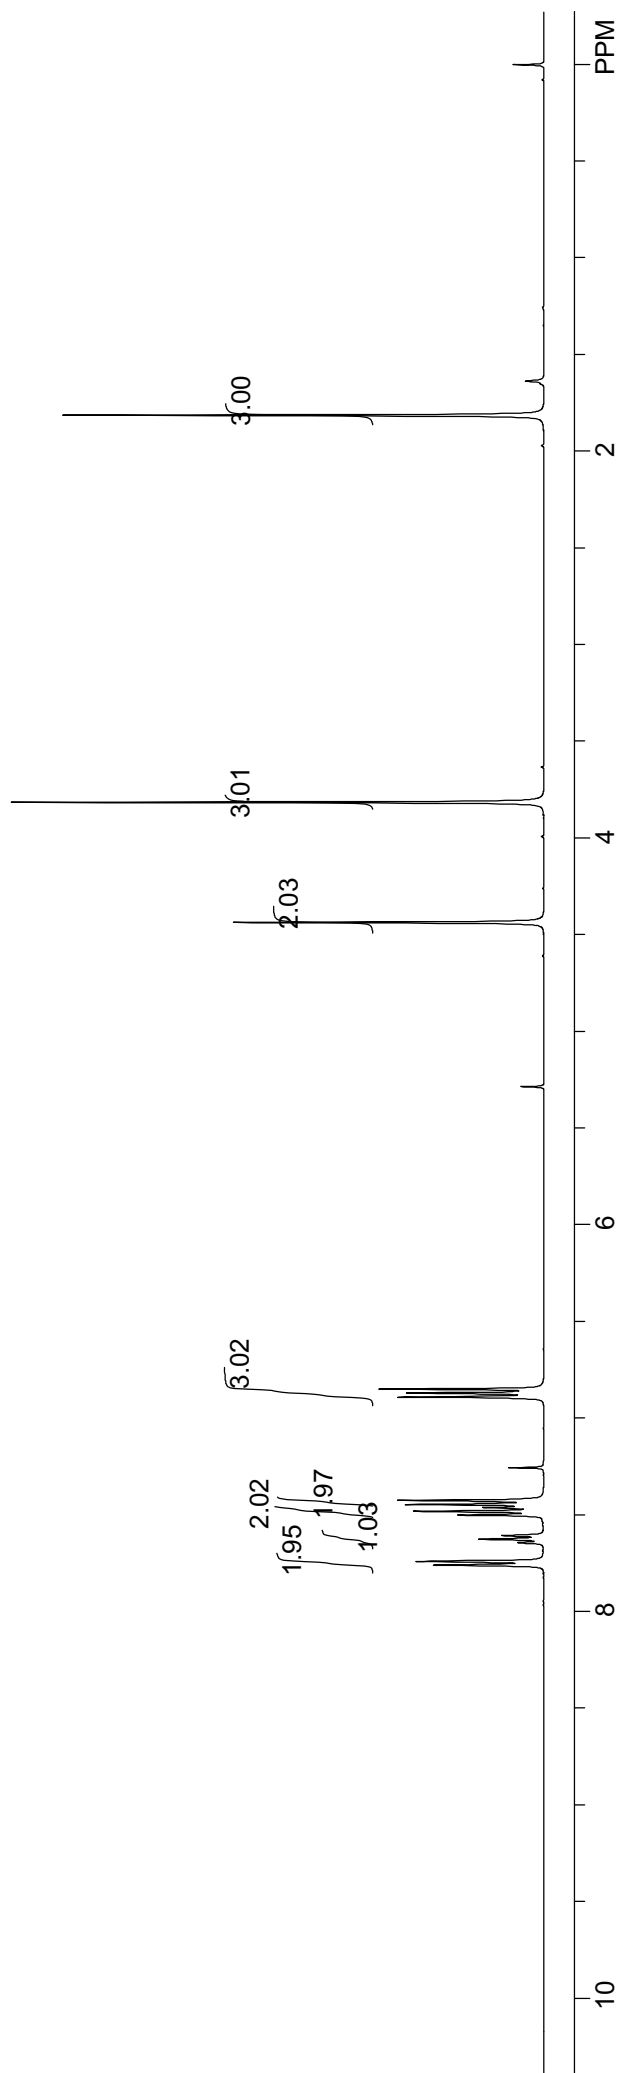

13.562

55.345  
56.019

76.724  
77.033  
77.357

114.272  
120.605  
124.701  
126.567  
126.883  
128.723  
129.061  
133.890  
137.835  
139.912  
144.572

159.458

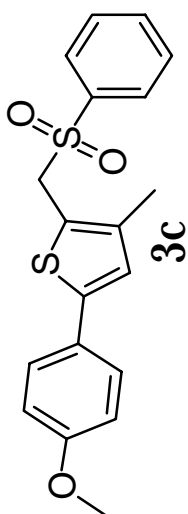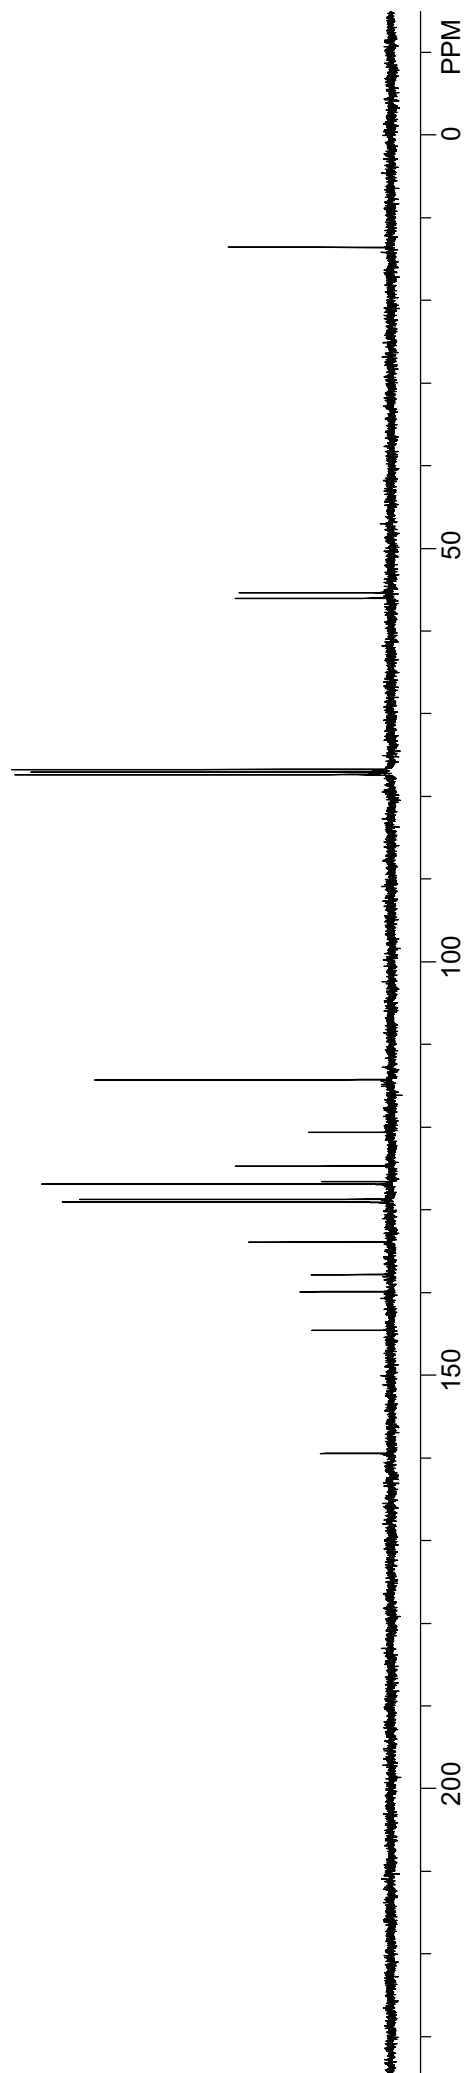



13.565

55.845

76.684  
76.997  
77.323

124.349  
124.983  
125.746  
128.207  
128.611  
129.208  
134.114  
137.734  
139.760  
140.638  
141.526  
146.757

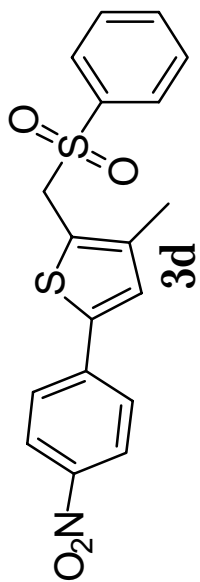

PPM

50

100

150

200

S20

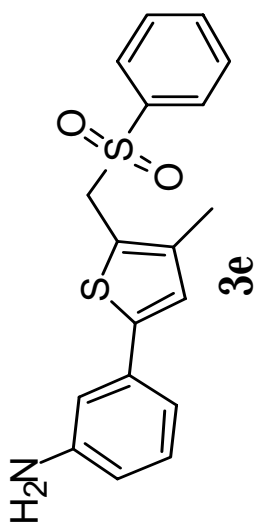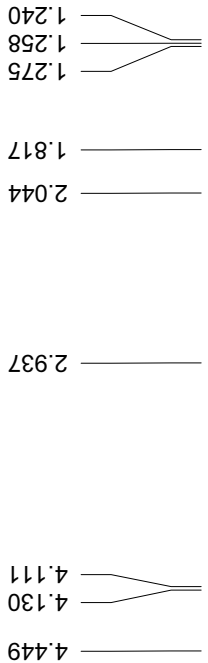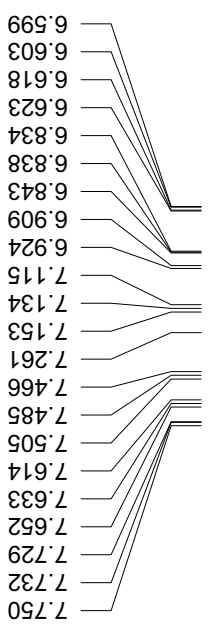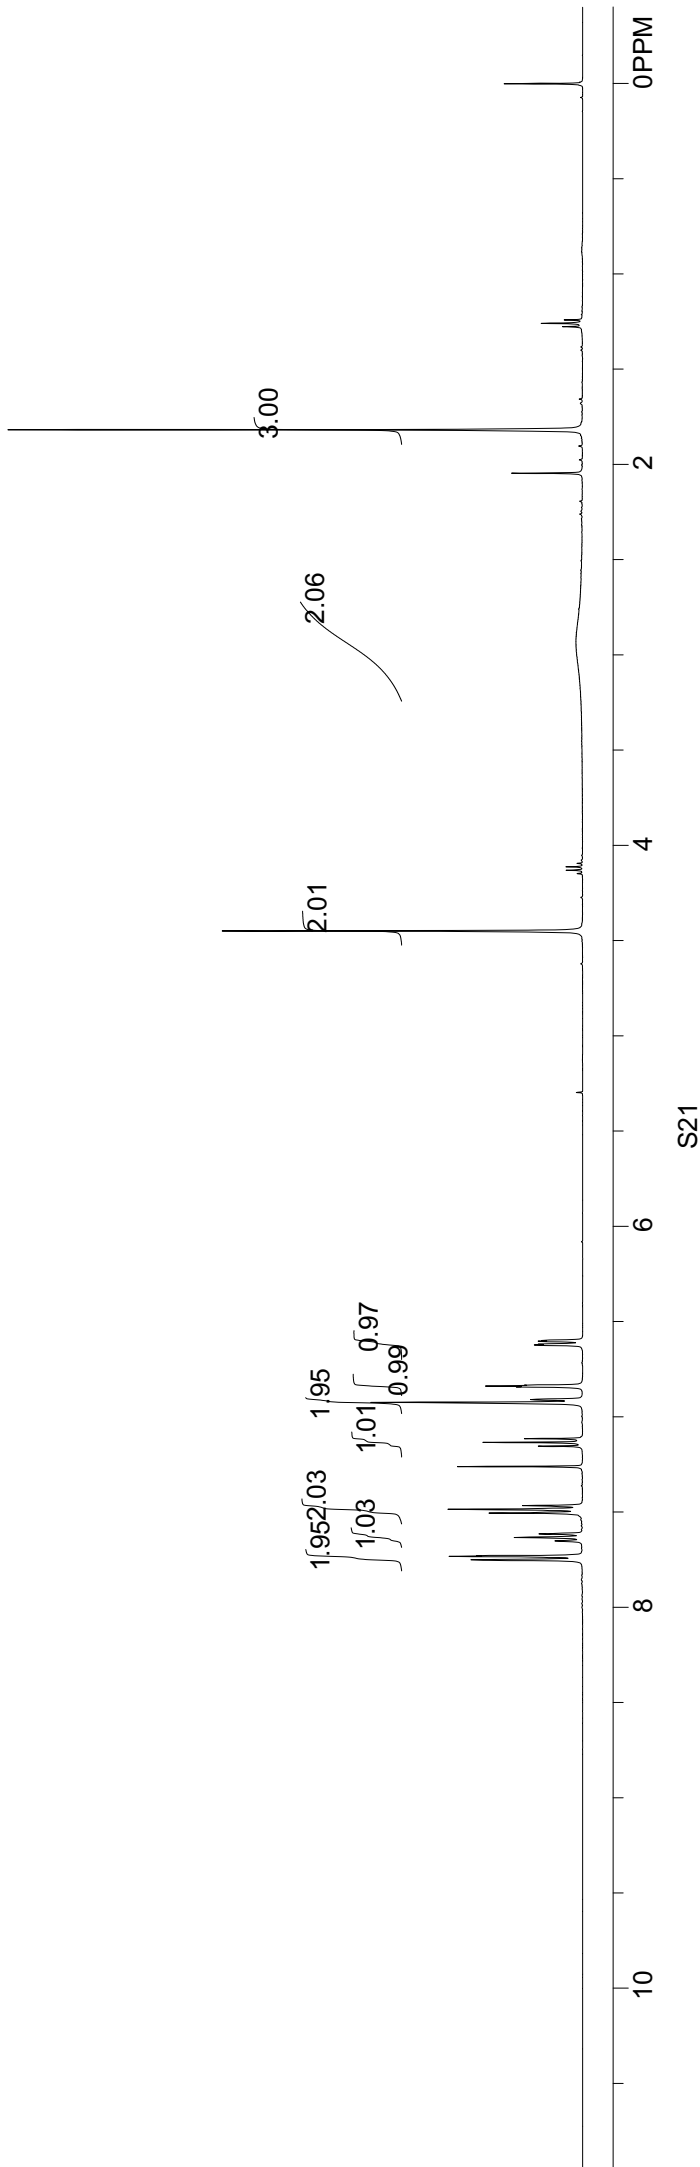

13.425

55.863

76.550

76.670

77.186

111.982

114.519

115.900

121.302

125.476

128.584

128.916

129.668

133.776

134.497

137.544

139.664

144.679

146.651

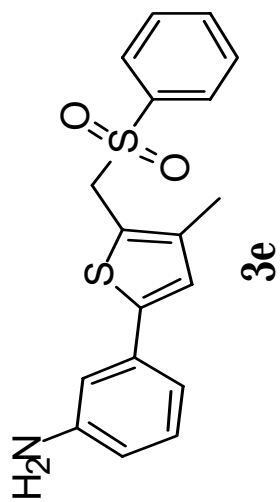

**3e**

0PPM

50

100

S22

150

200

0.000

1.797

4.424

7.765  
7.747  
7.641  
7.622  
7.517  
7.499  
7.480  
7.259  
7.210  
7.199  
7.116  
7.109  
7.003  
6.994  
6.992  
6.982  
6.824

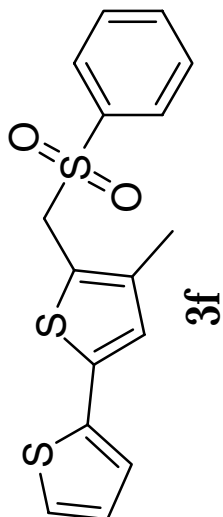

1.97 2.06  
1.03 0.97 1.01  
0.98 0.98

3.00

2.07

PPM

2

4

6

8

10

13.332

55.772

76.571  
76.882  
77.206

121.083  
123.852  
124.579  
126.040  
127.719  
128.596  
128.984  
133.837  
136.635  
137.626  
137.656  
139.589

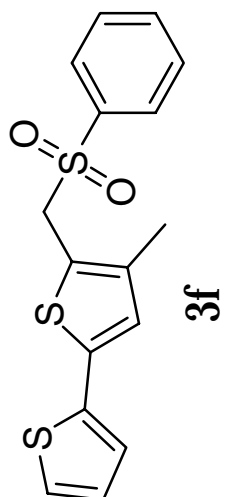

PPM

50

100

150

200

S24



1.787

4.432

7.747  
7.727  
7.650  
7.630  
7.613  
7.506  
7.487  
7.467  
7.374  
7.262  
6.891  
6.455  
6.447  
6.425  
6.420  
6.416  
6.411

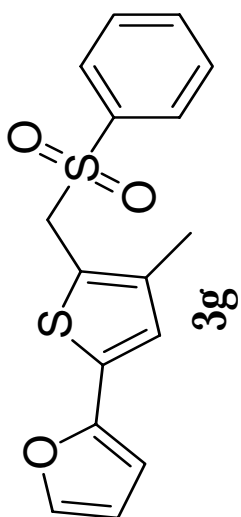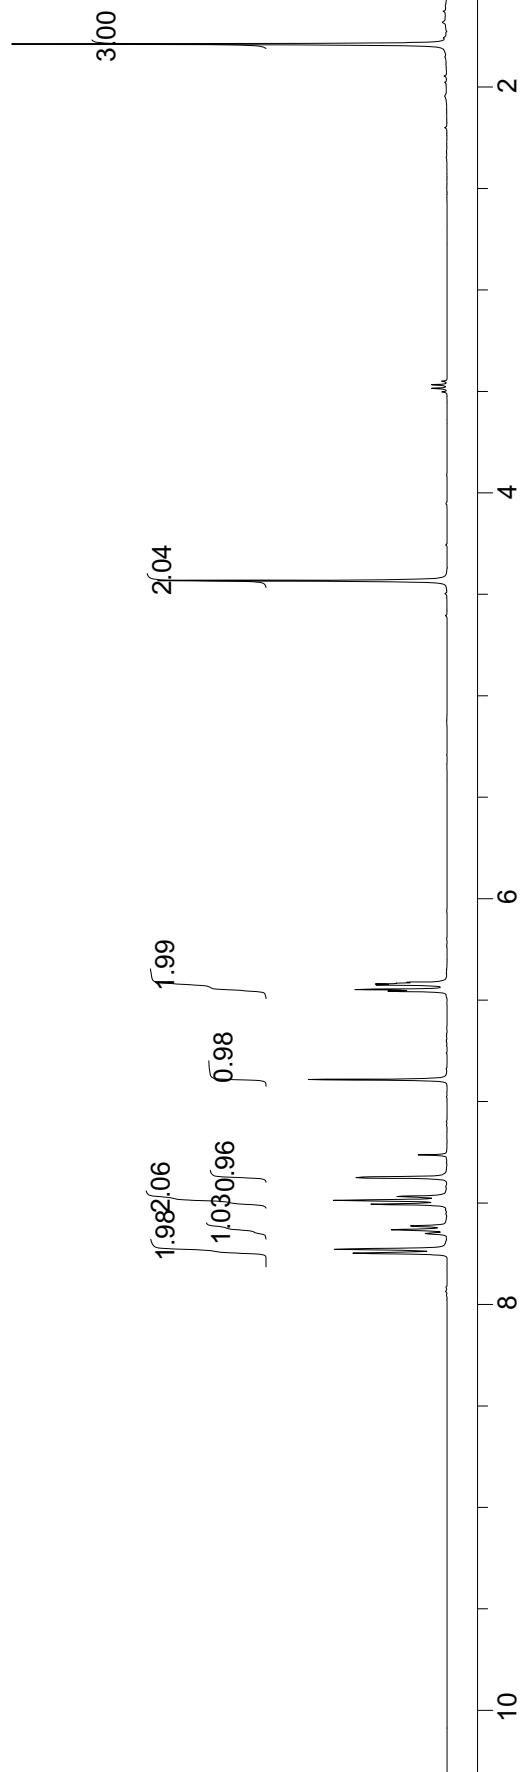

S25

13.314

55.780

76.590

76.906

77.217

105.435

111.598

120.966

124.770

128.573

128.976

133.829

137.574

139.463

141.735

148.661

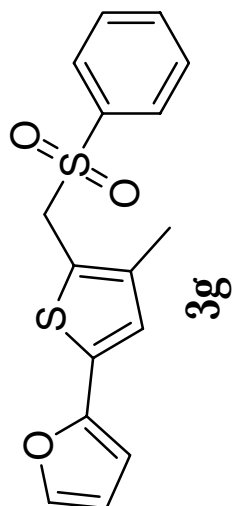

3g

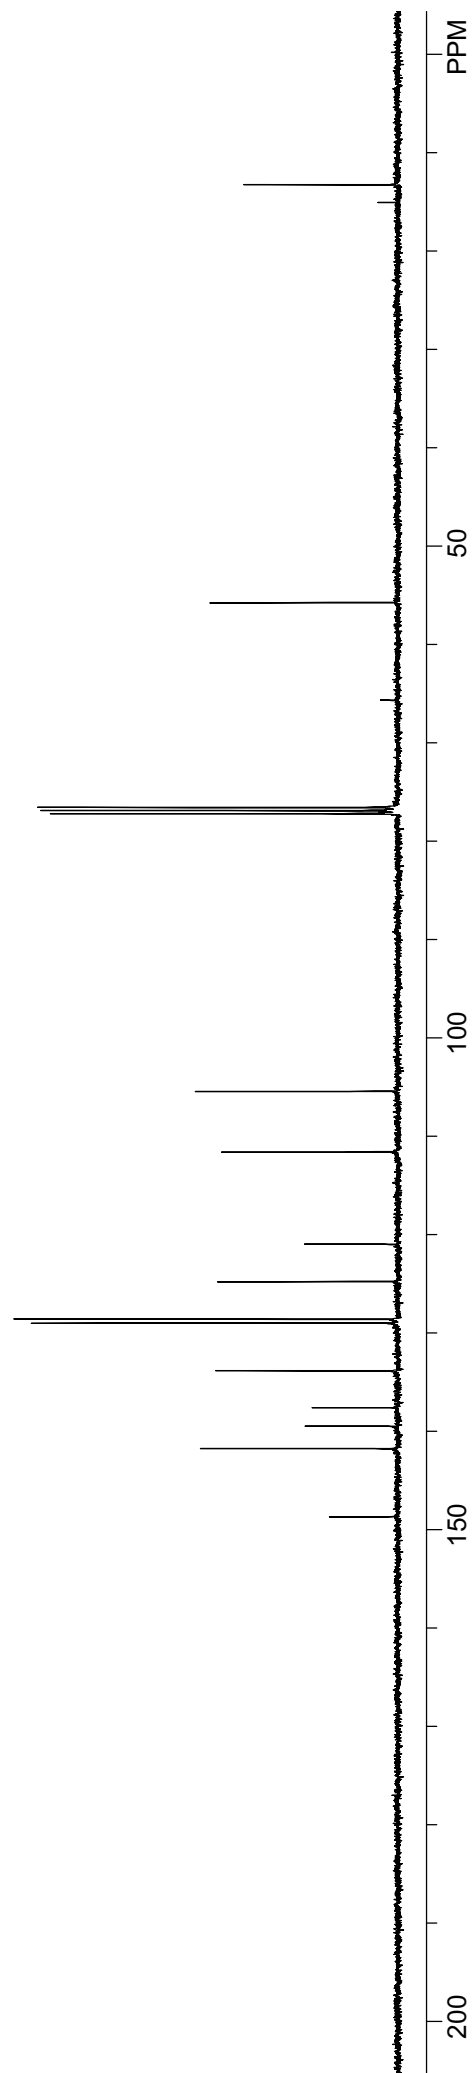

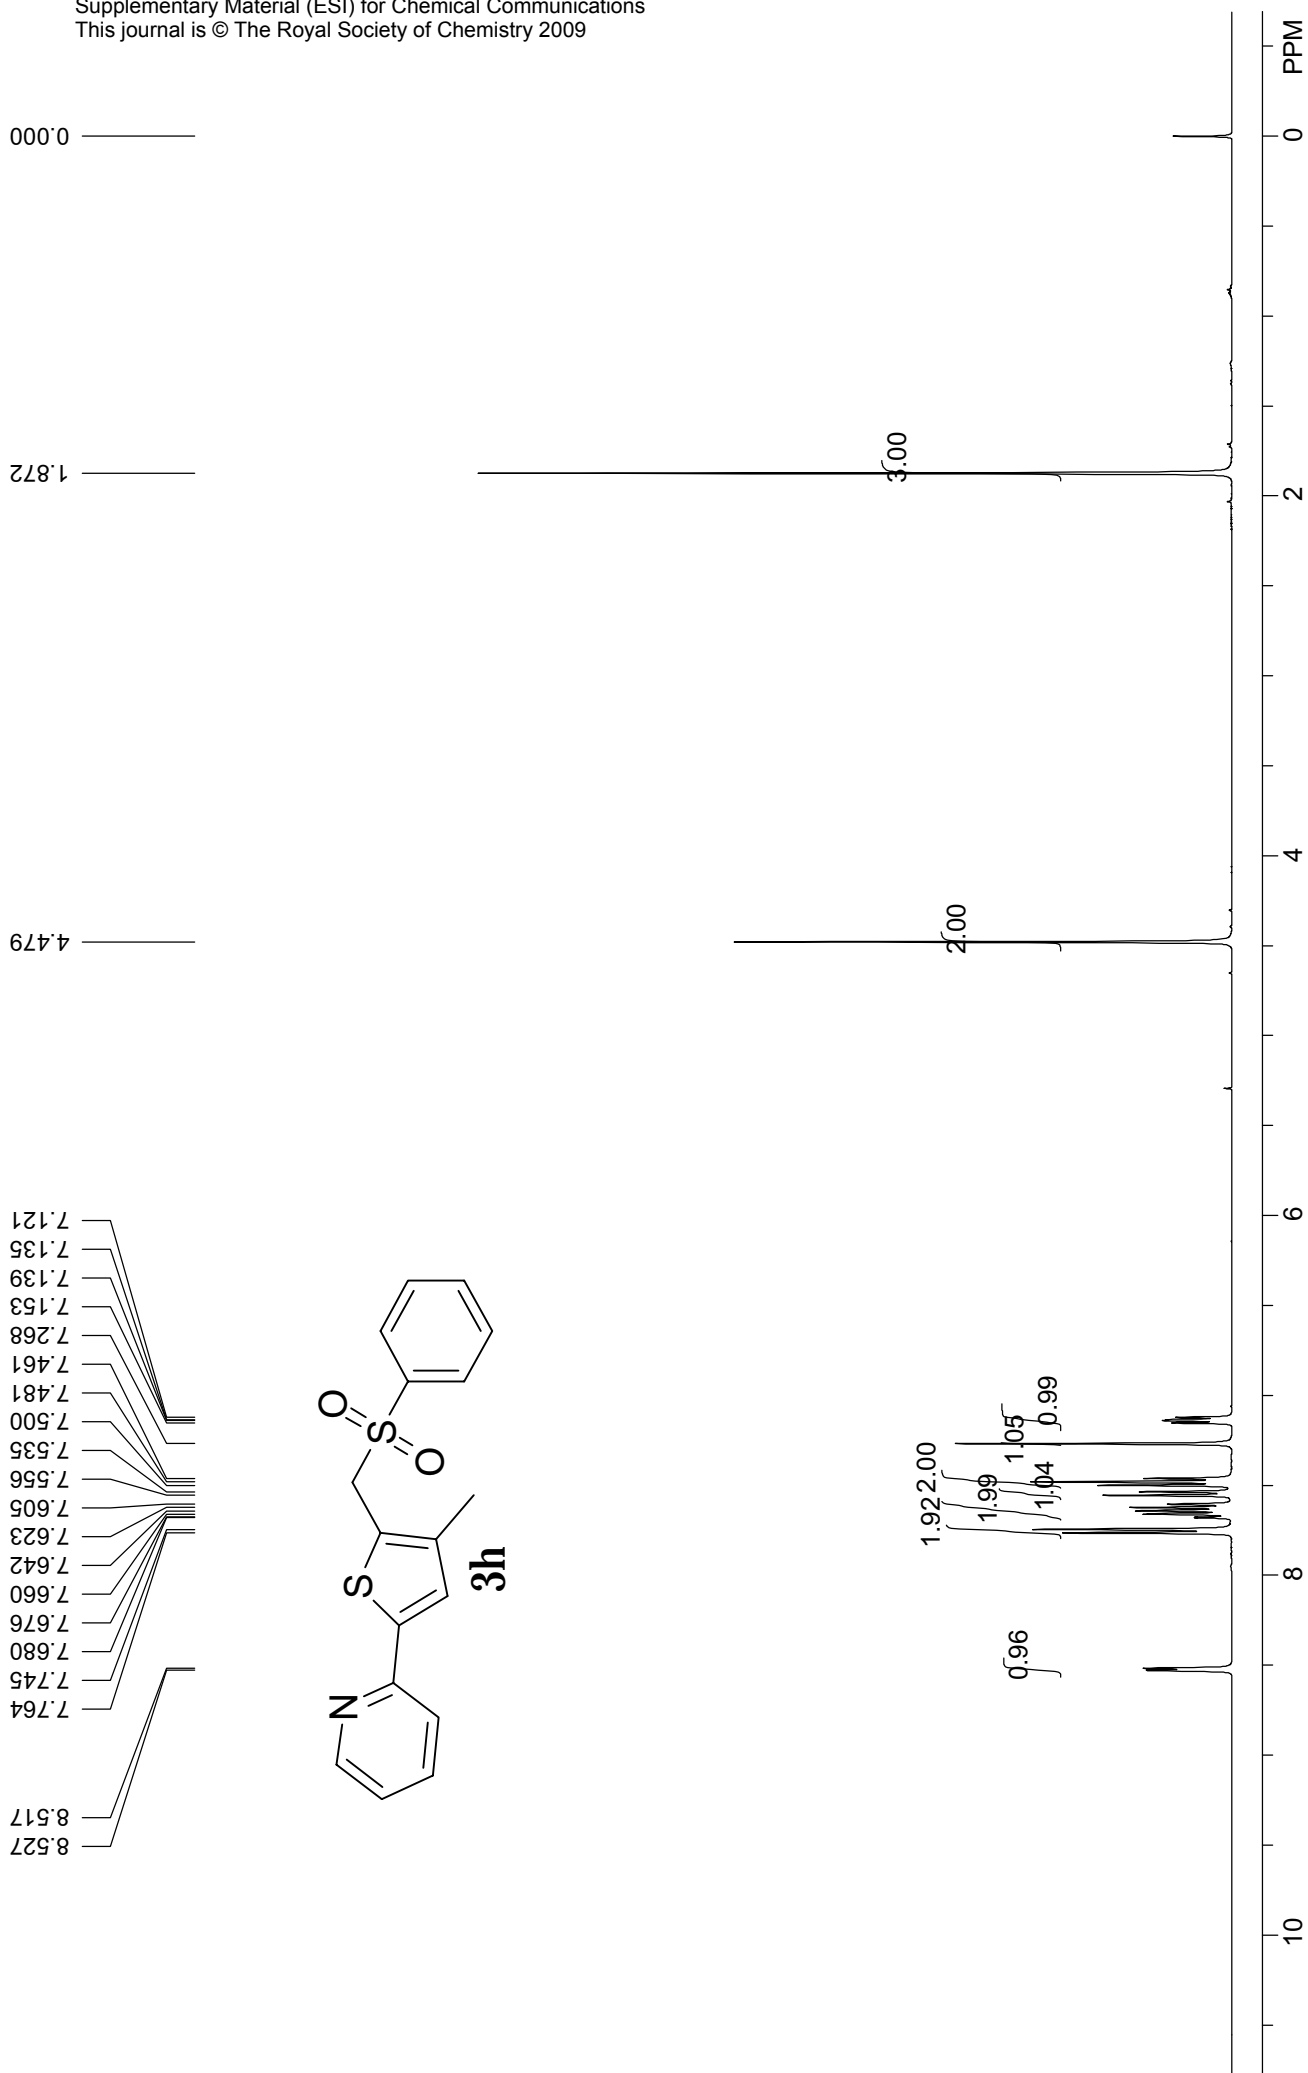

13.671

56.102

77.347  
77.032  
76.709

151.828  
149.524  
144.639  
140.003  
137.758  
136.655  
133.955  
129.100  
128.679  
127.189  
124.585  
122.175  
118.663

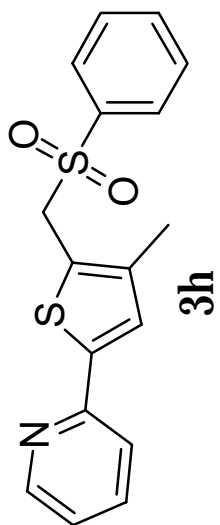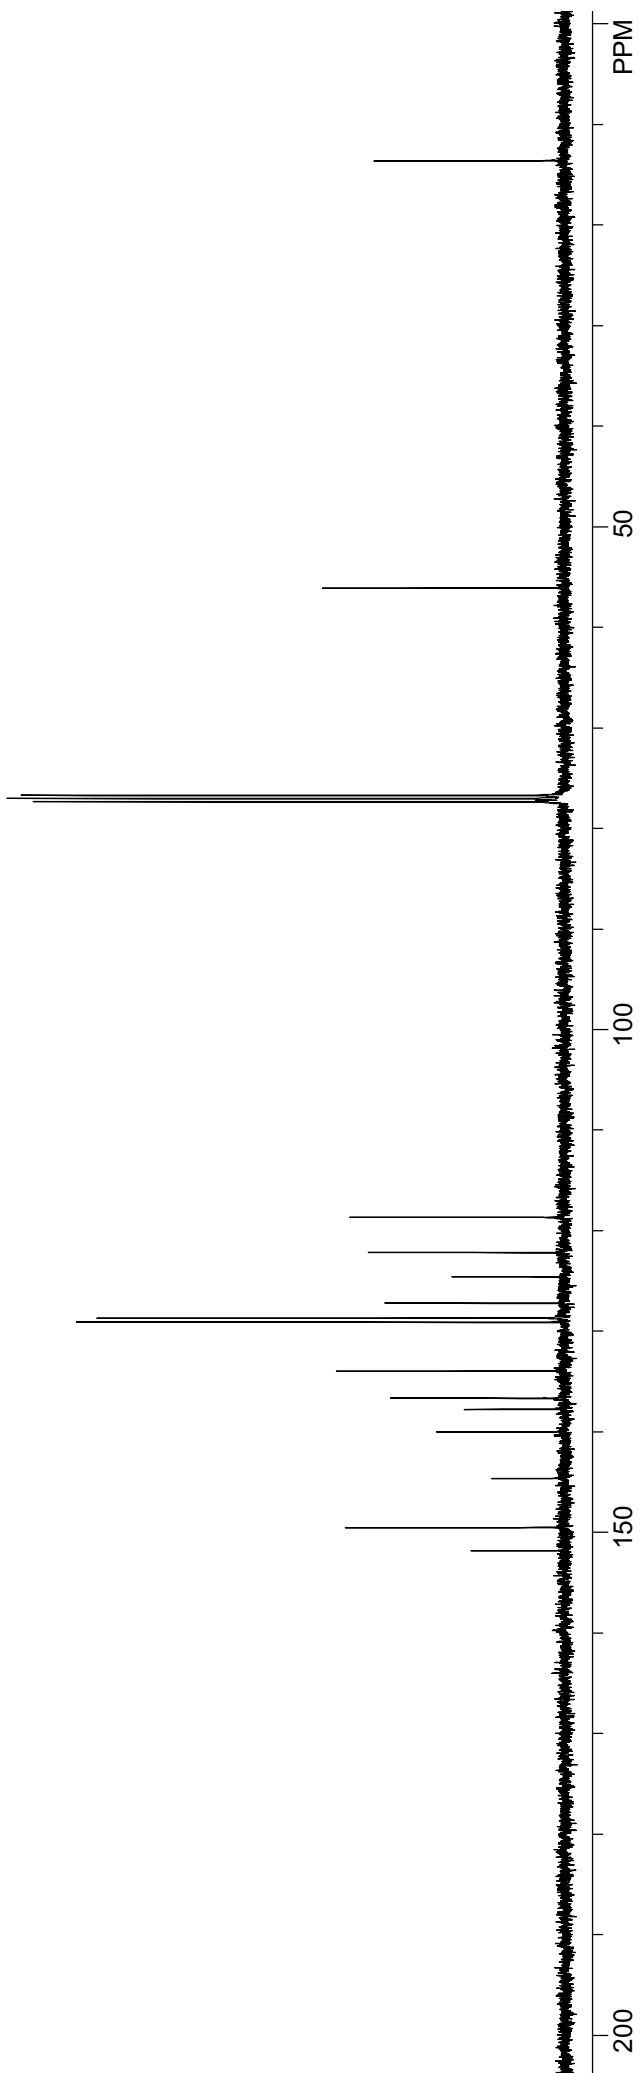

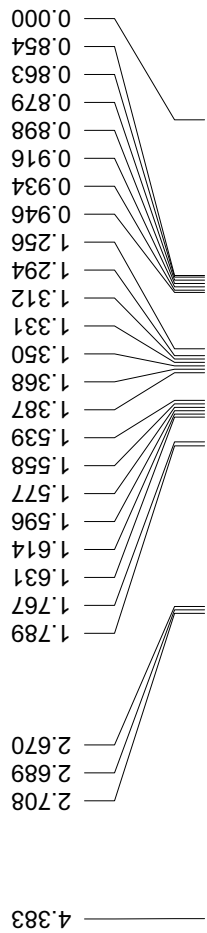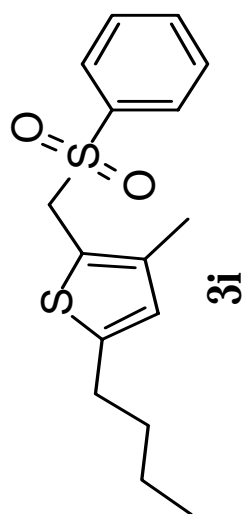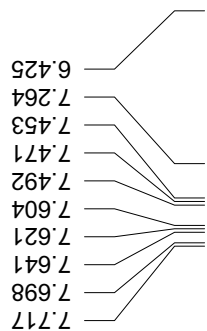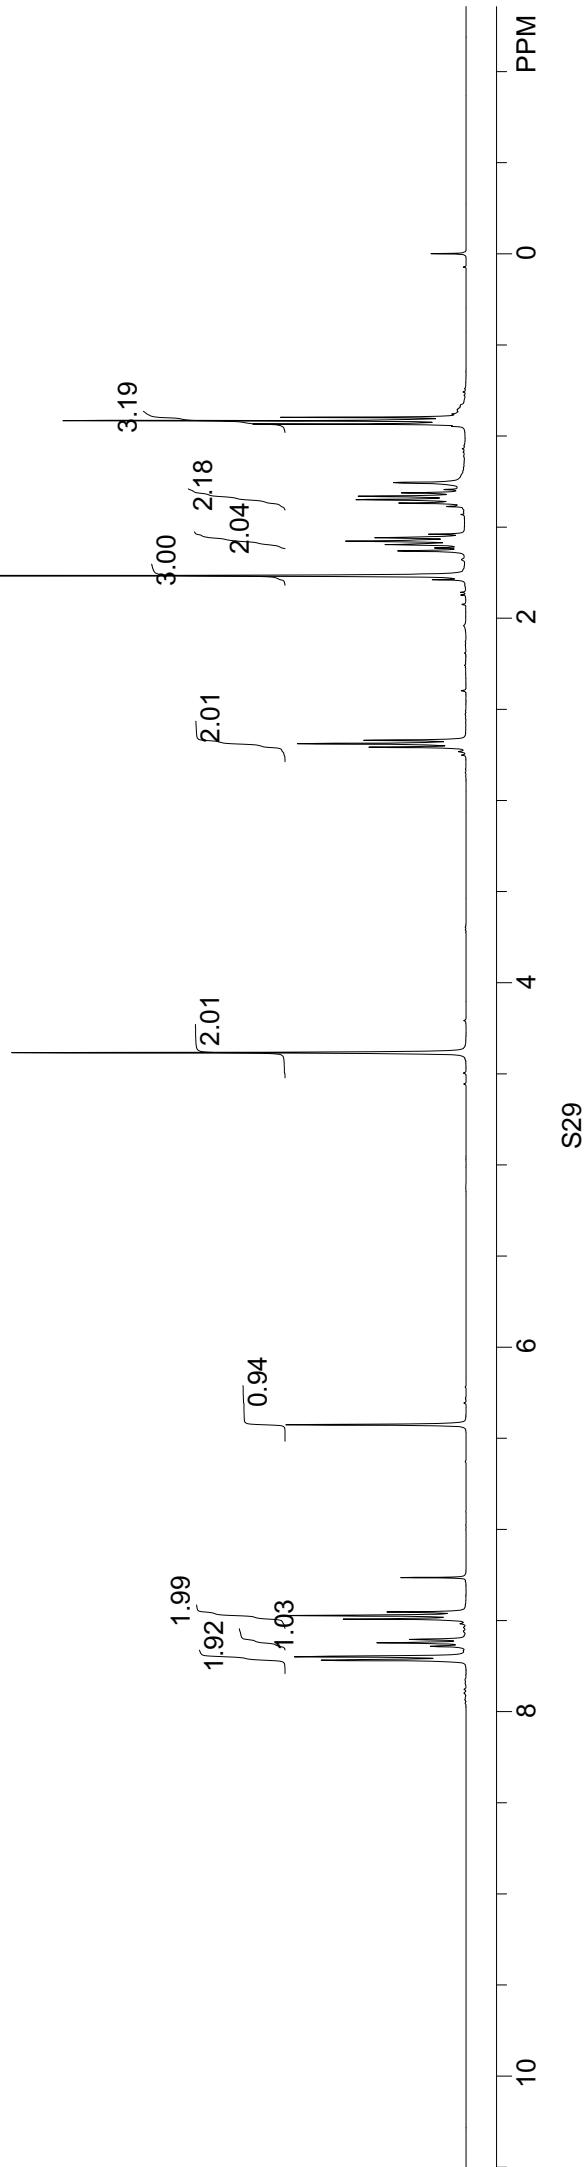

13.378  
13.692

21.945

29.564

33.466

55.885

76.640  
76.950  
77.275

119.333

127.040

128.642

128.866

133.684

137.773

138.642

146.562

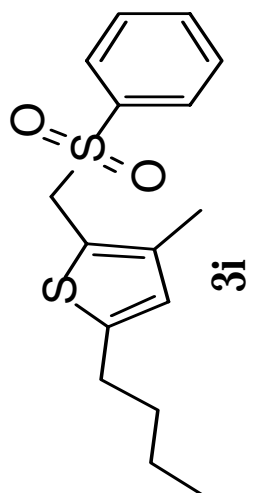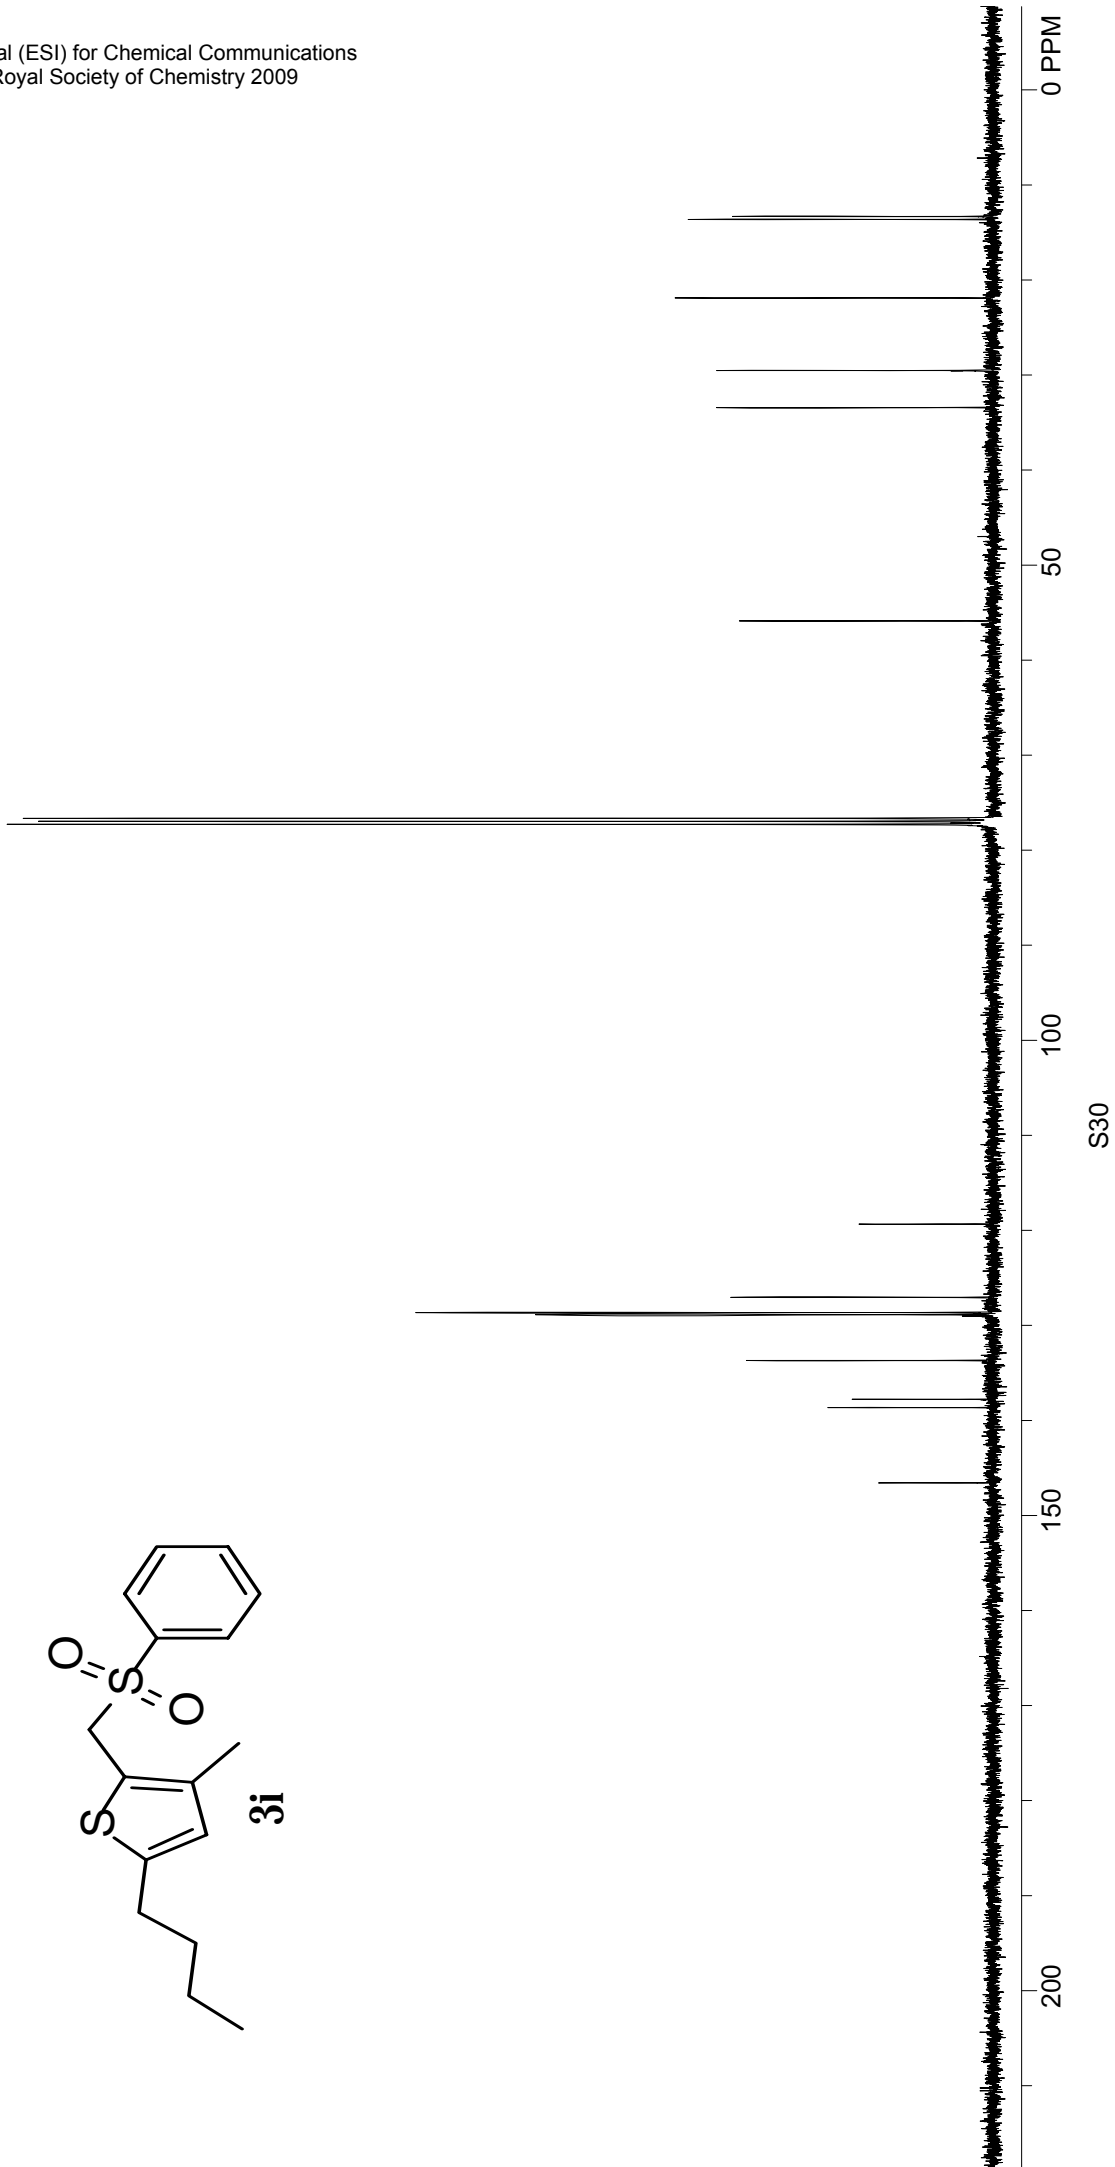

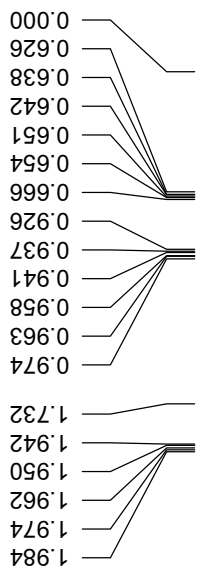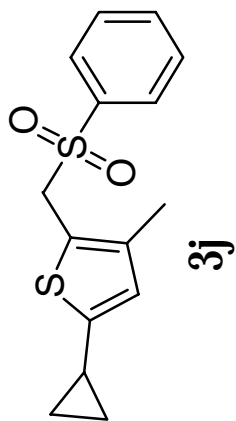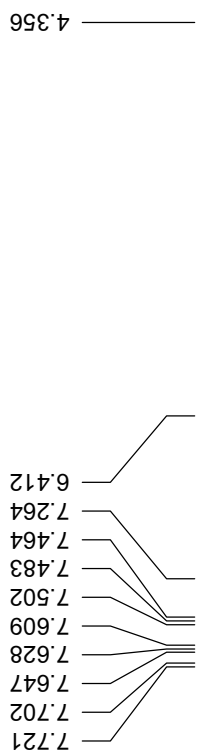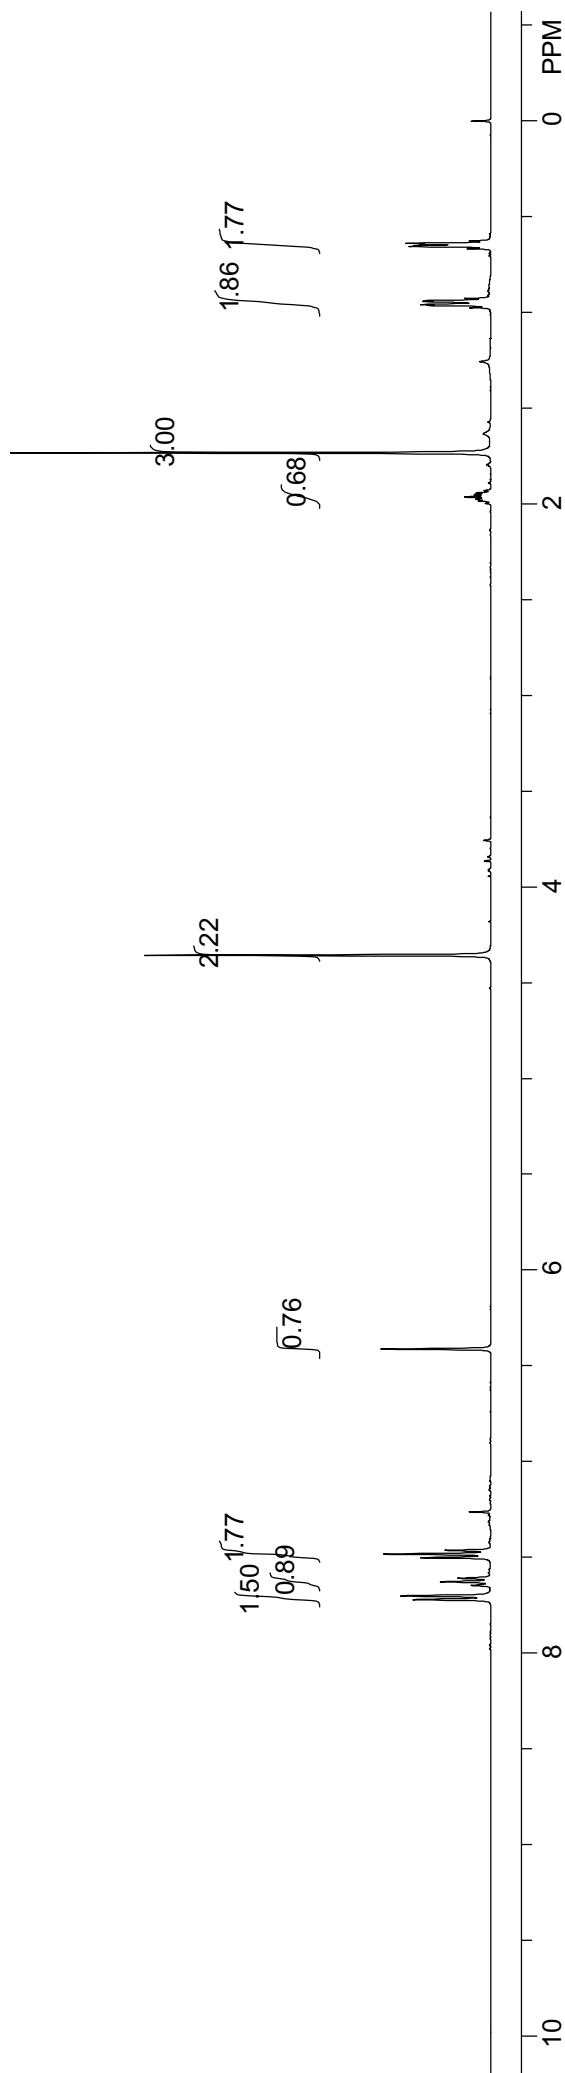

13.392  
11.091  
9.865

55.873

77.305  
76.980  
76.671

118.337

125.502

128.633

128.939

133.740

137.832

138.712

149.426

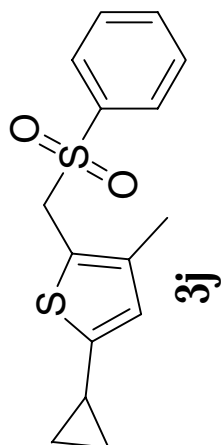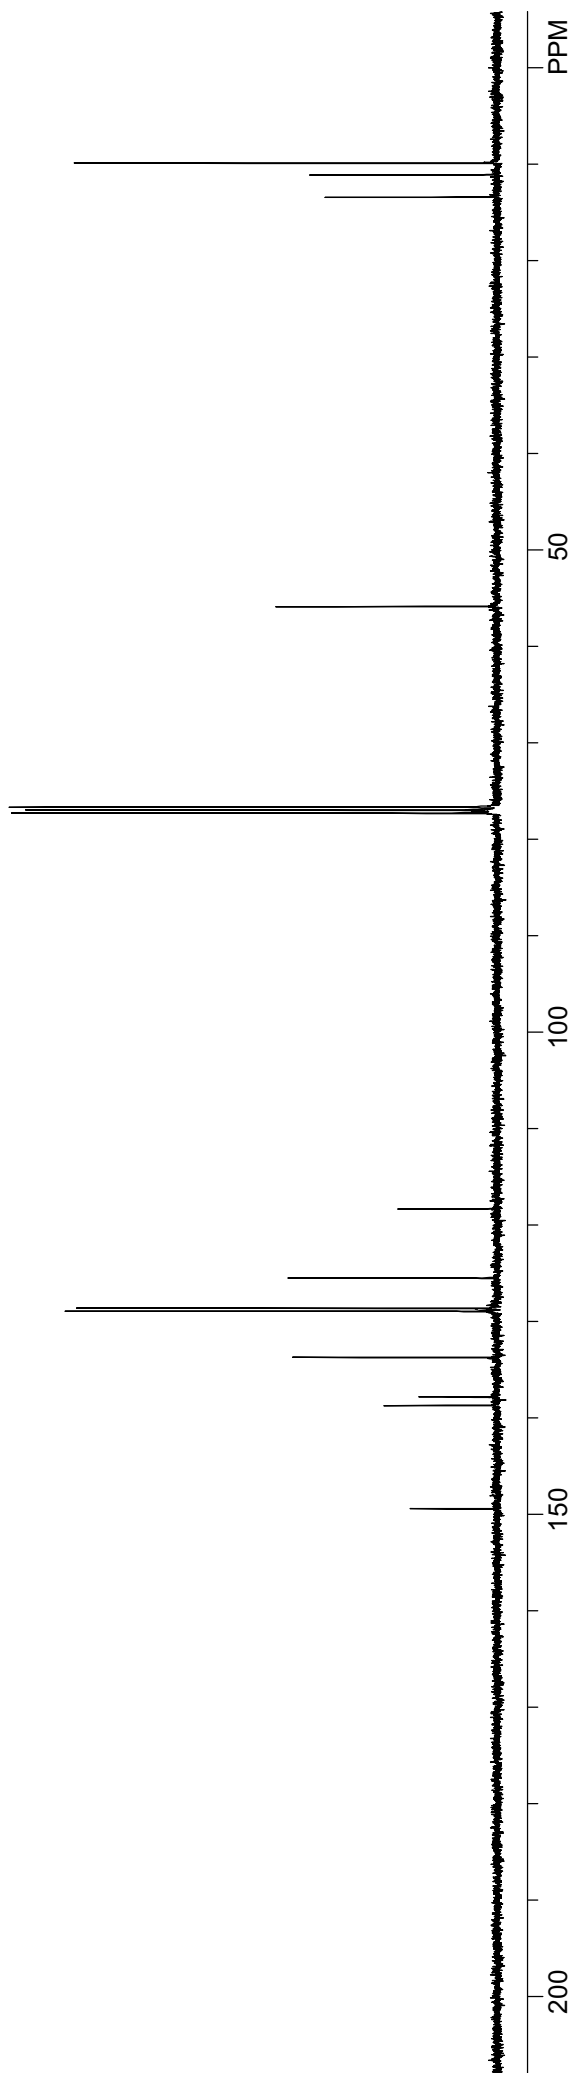



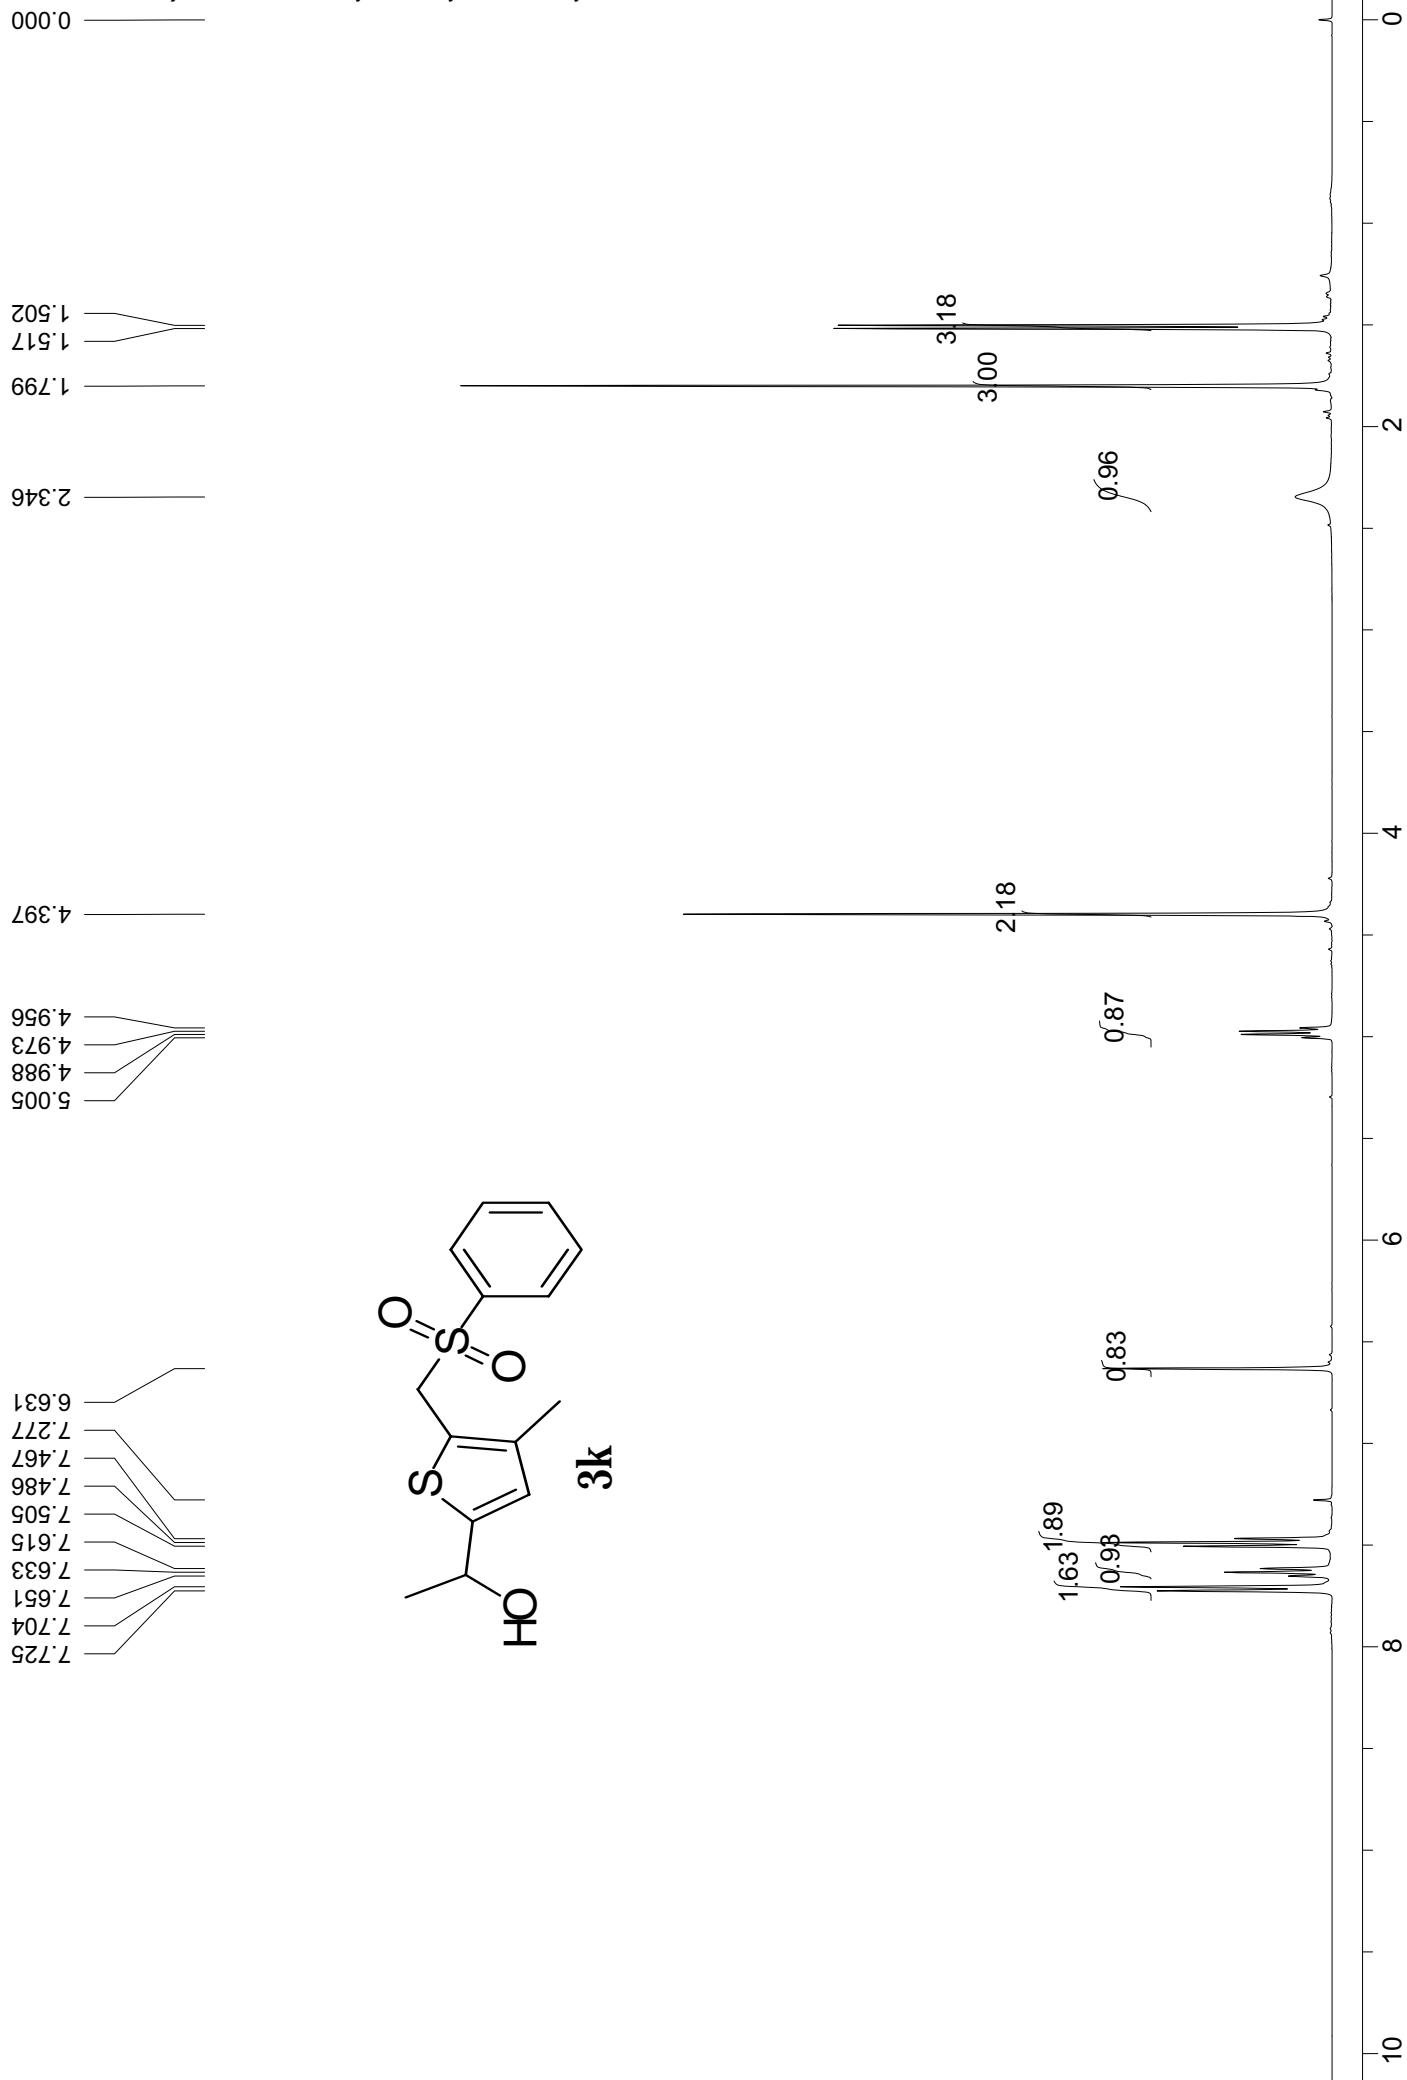

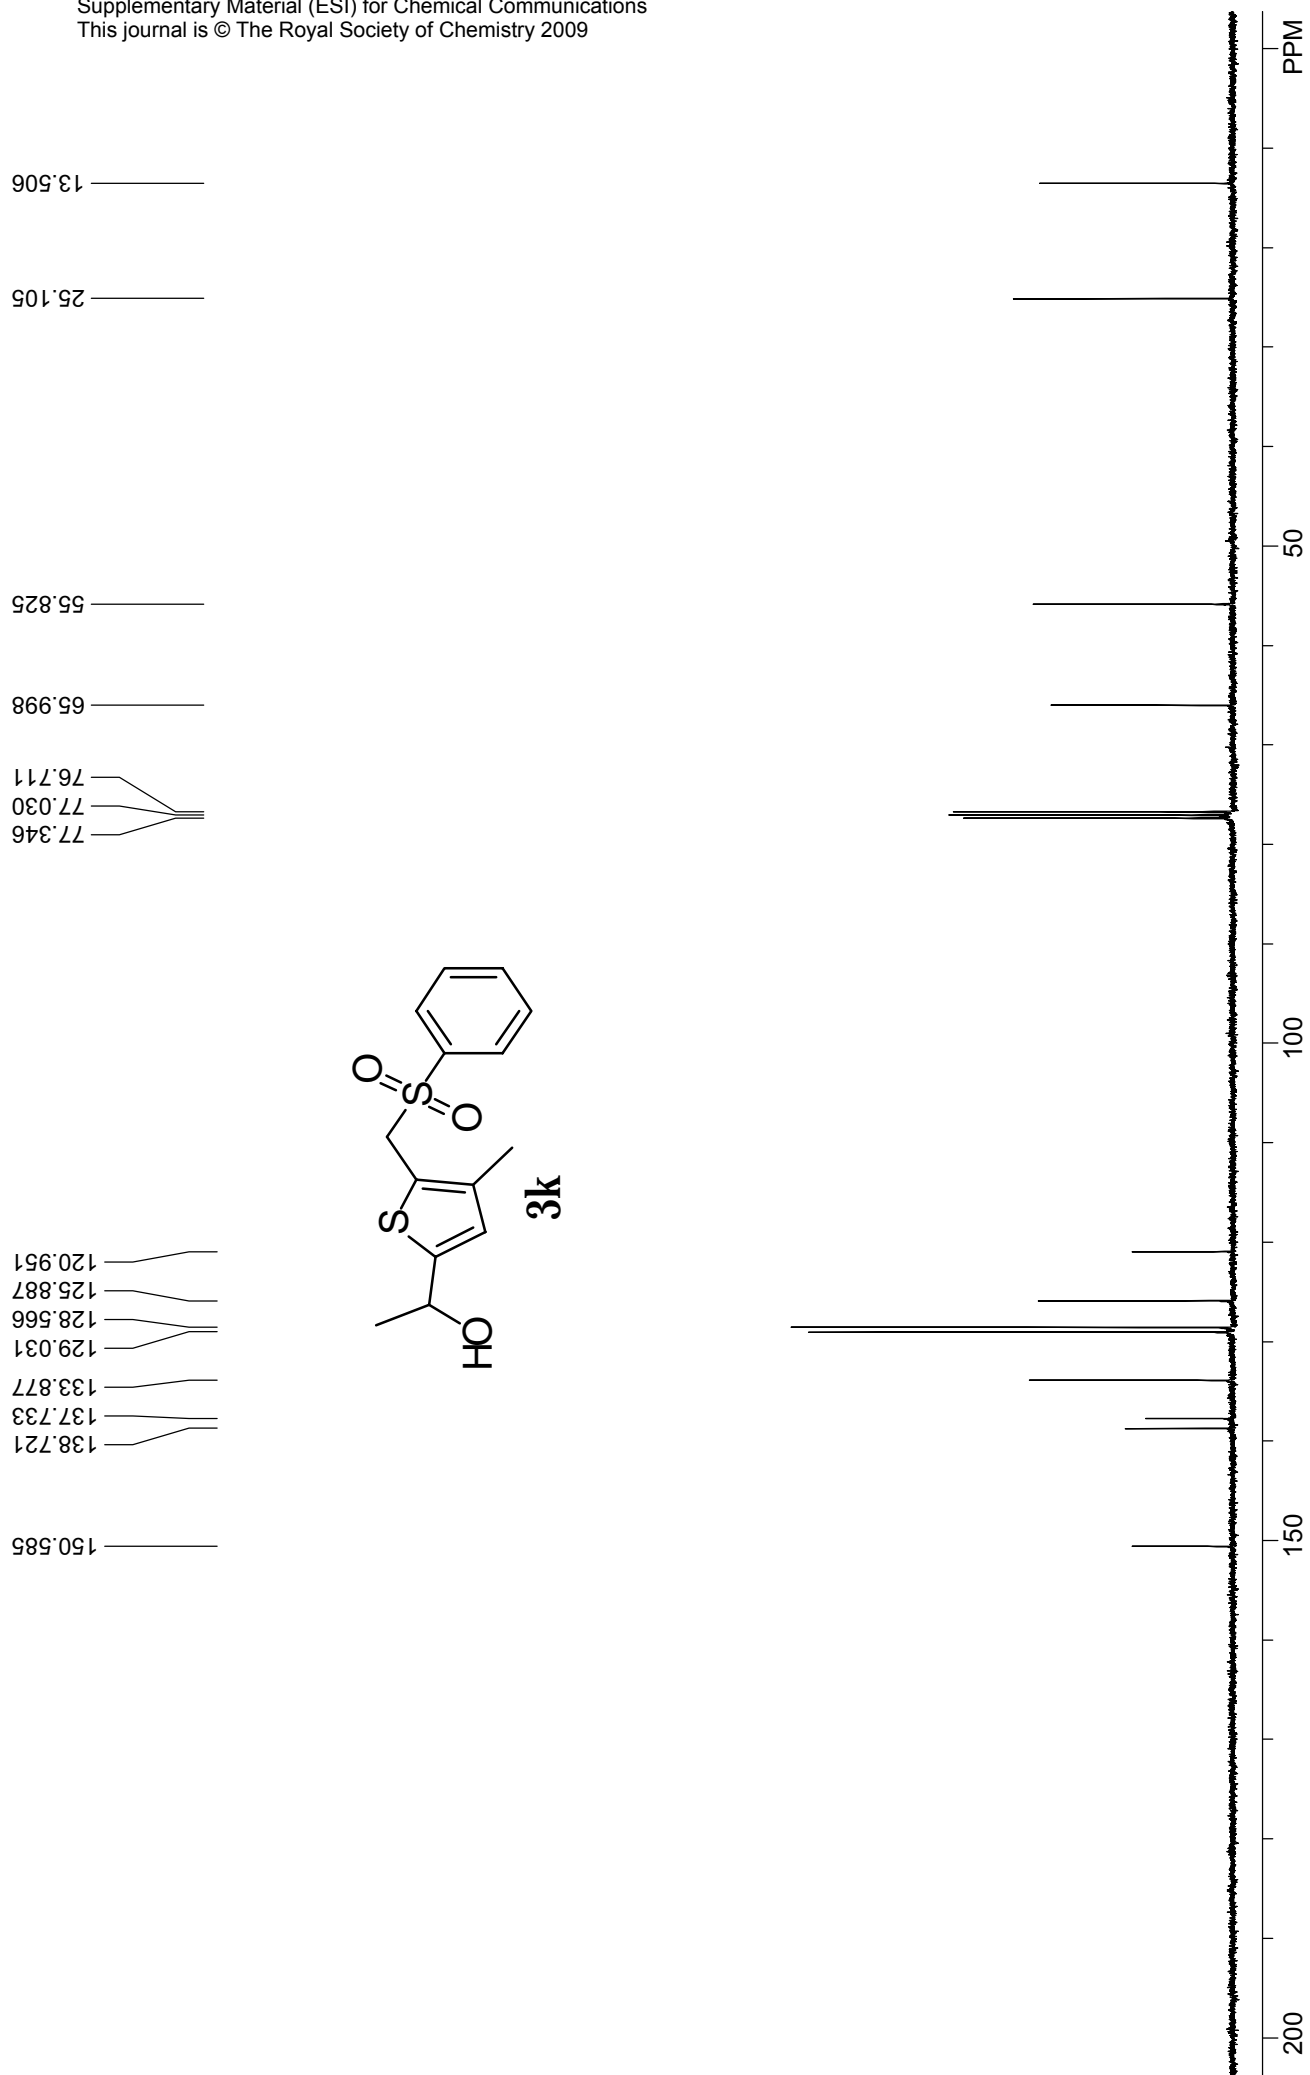

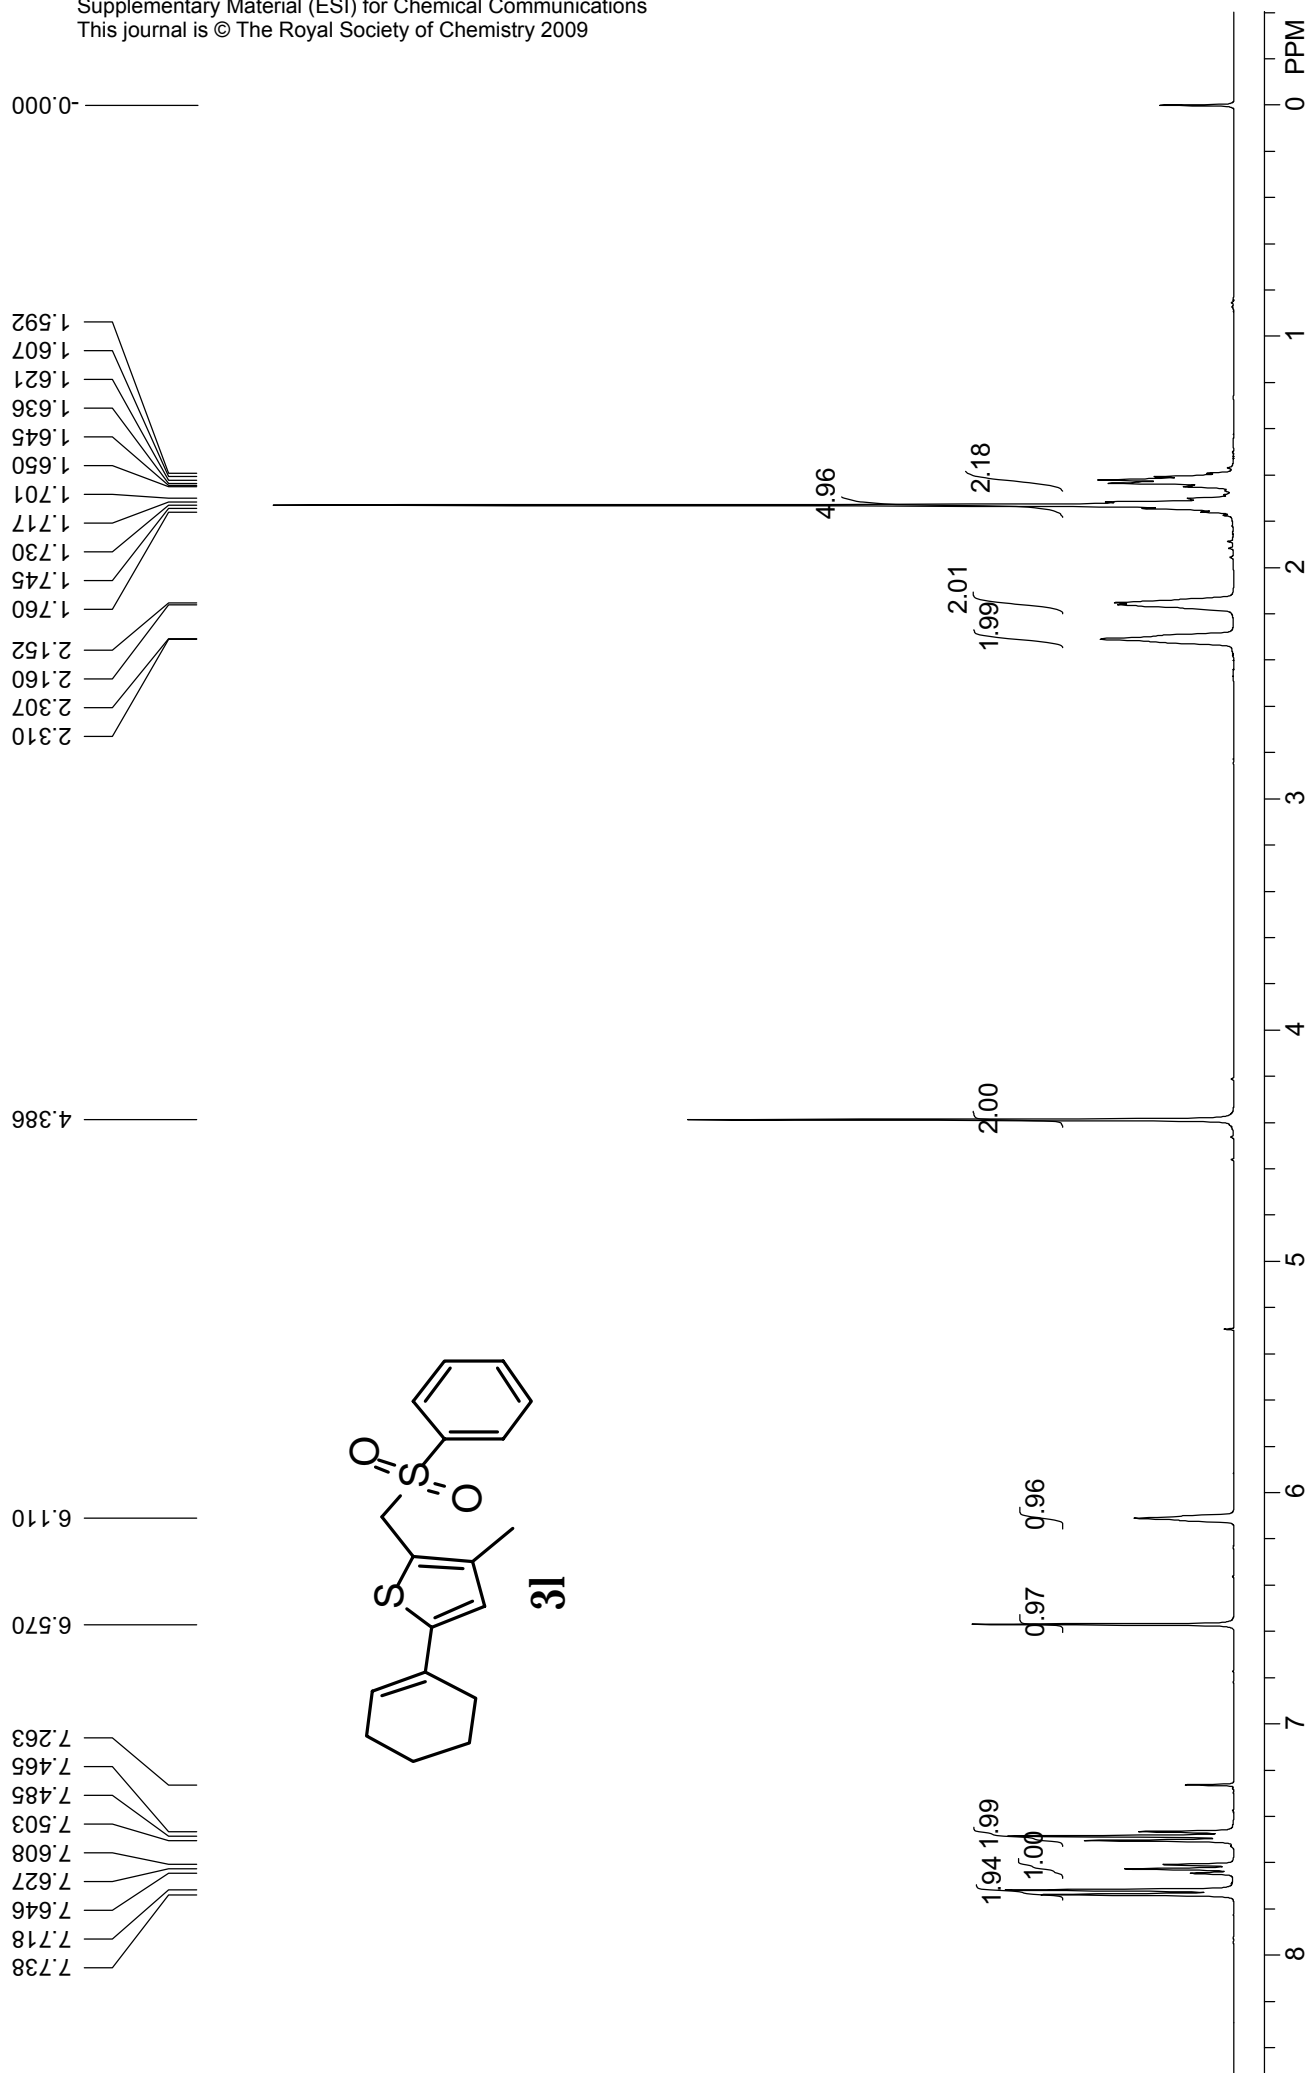

13.457  
21.970  
22.571  
25.578  
27.079

56.046

76.698  
77.023  
77.343

119.284  
123.811  
124.751  
128.709  
128.995  
130.703  
133.802  
137.877  
139.024  
147.306

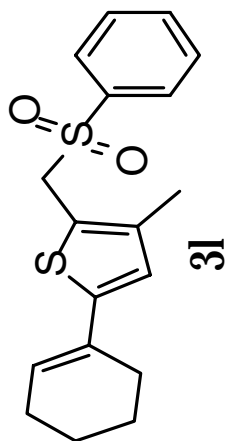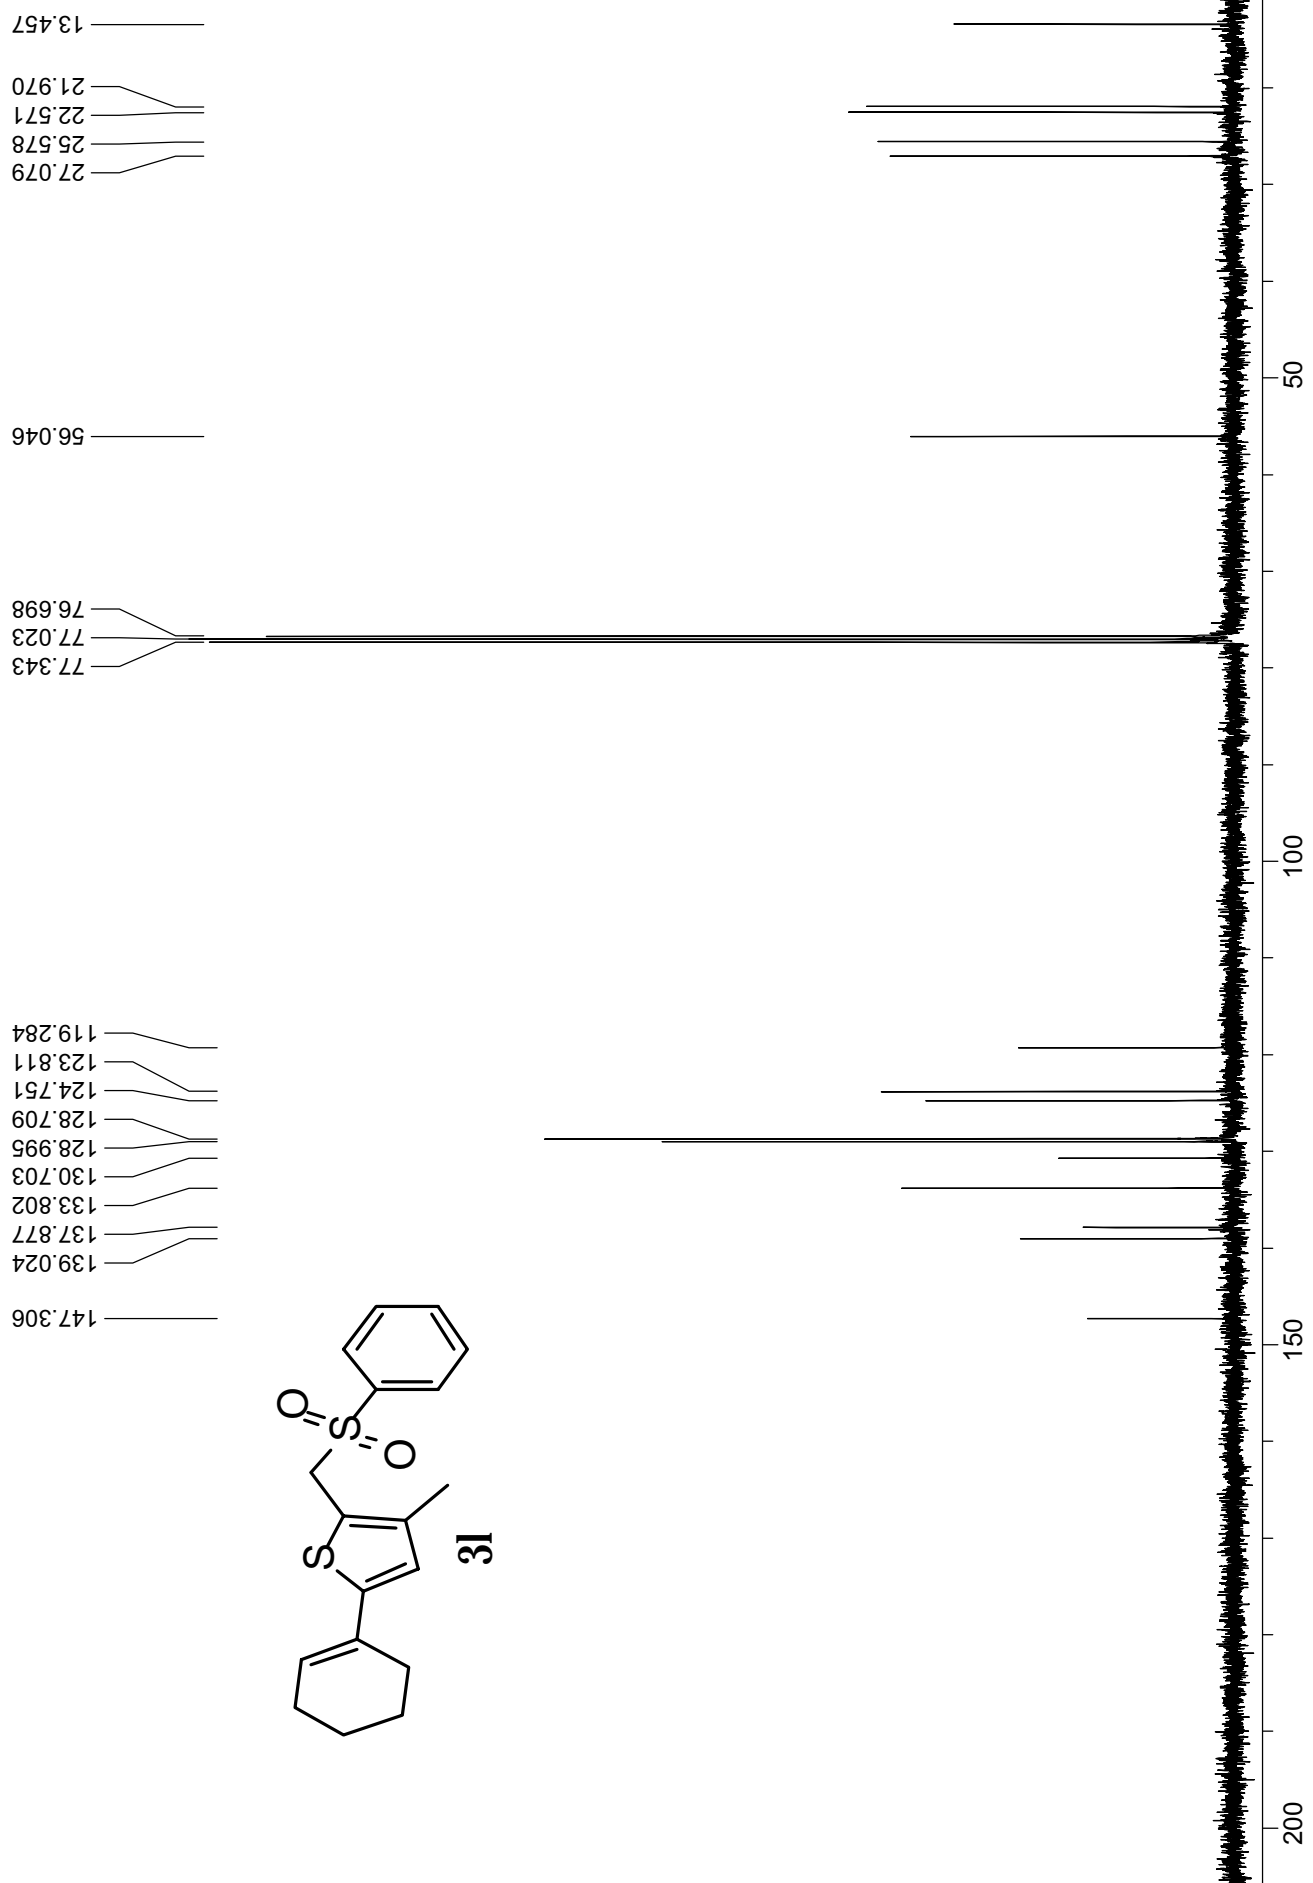

0.000

1.850

4.416

7.696  
7.677  
7.623  
7.605  
7.586  
7.562  
7.543  
7.457  
7.437  
7.418  
7.258  
7.246  
7.227  
6.937  
6.918  
6.892  
6.873  
6.853  
6.781  
5.159

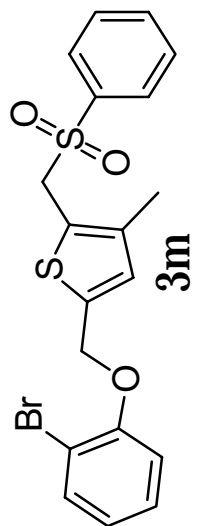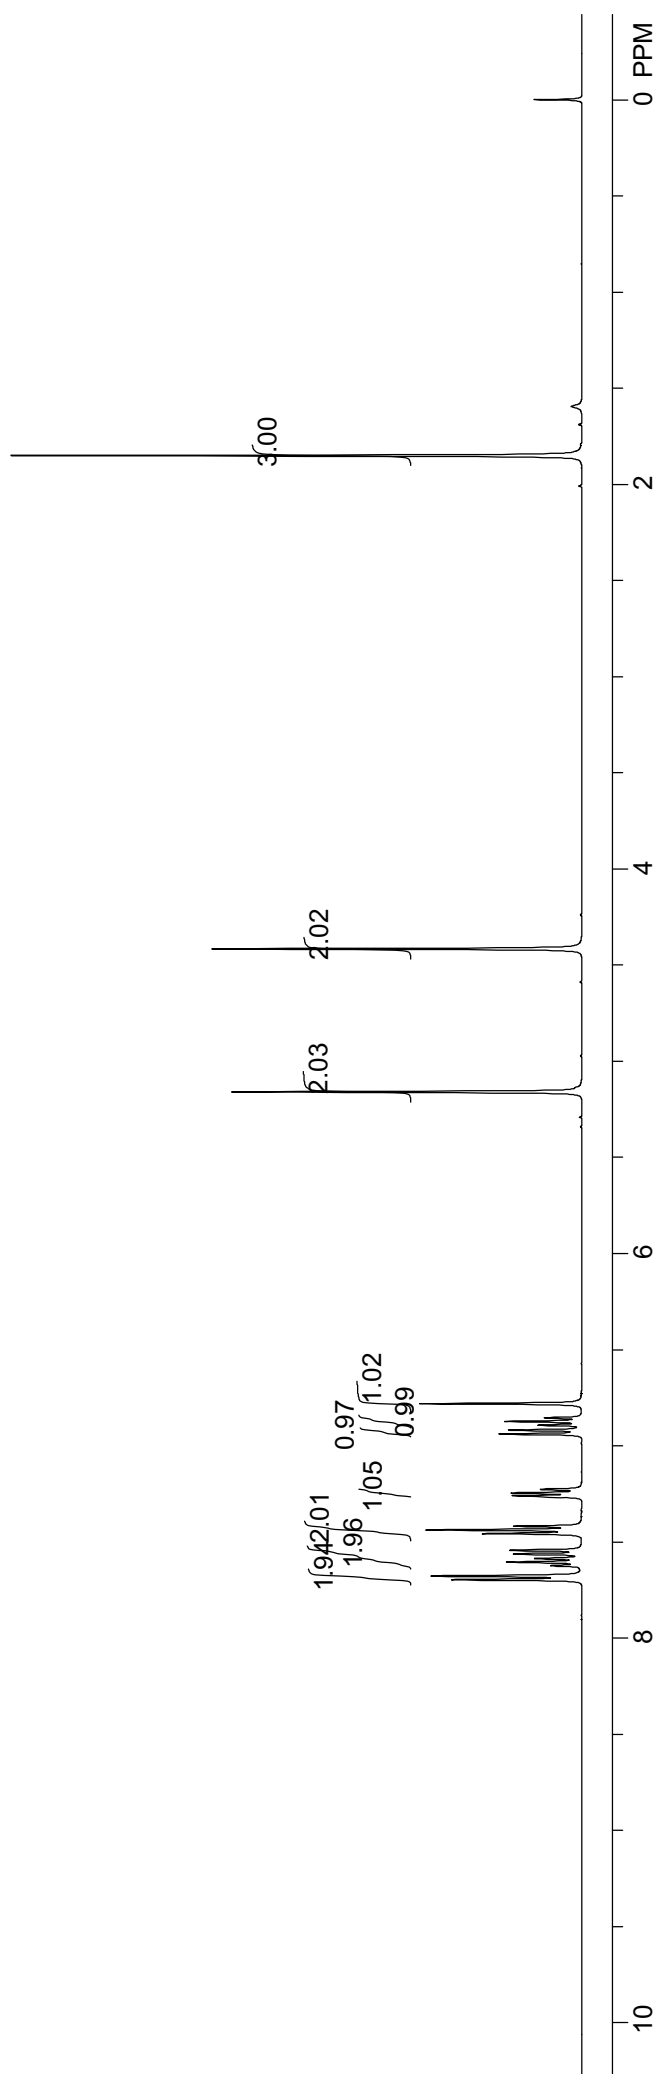

13.447

55.726

65.948

76.581  
76.900  
77.216

112.697  
114.211  
122.576  
123.146  
128.224  
128.538  
128.915  
129.273  
133.413  
133.810  
137.448  
138.730  
139.192  
154.376

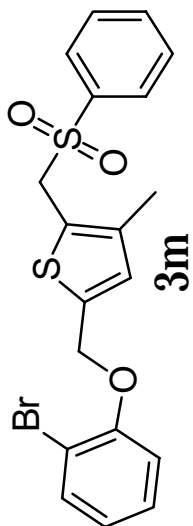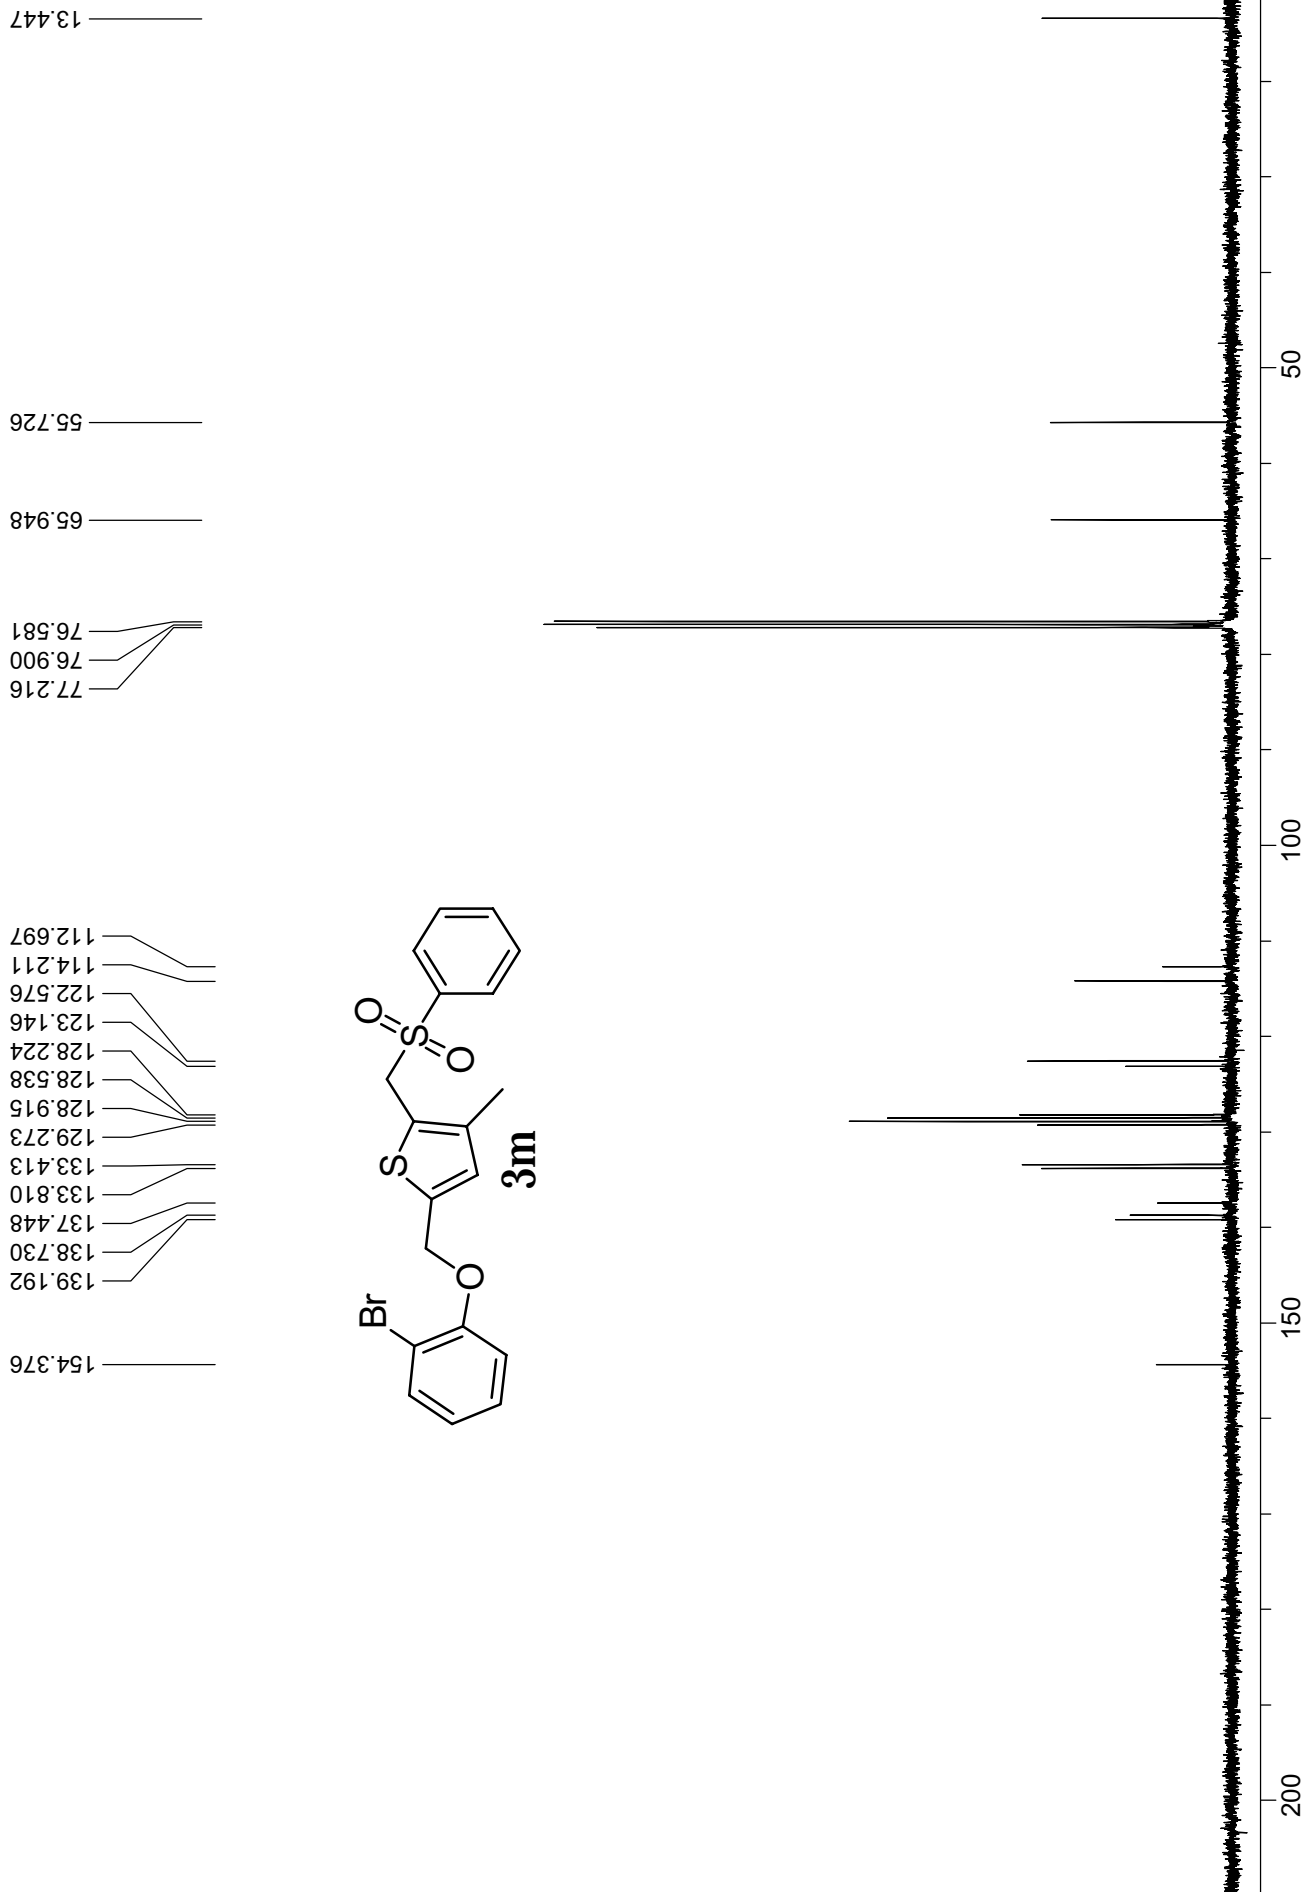

-0.000

1.837  
1.698

4.078

4.418

5.232

6.797  
7.273  
7.486  
7.507  
7.525  
7.636  
7.656  
7.674  
7.715  
7.735

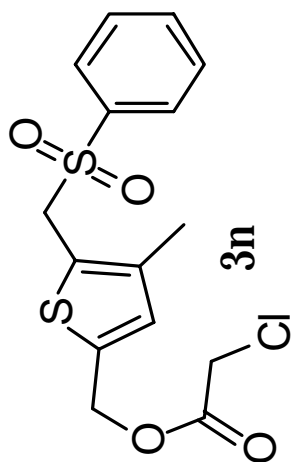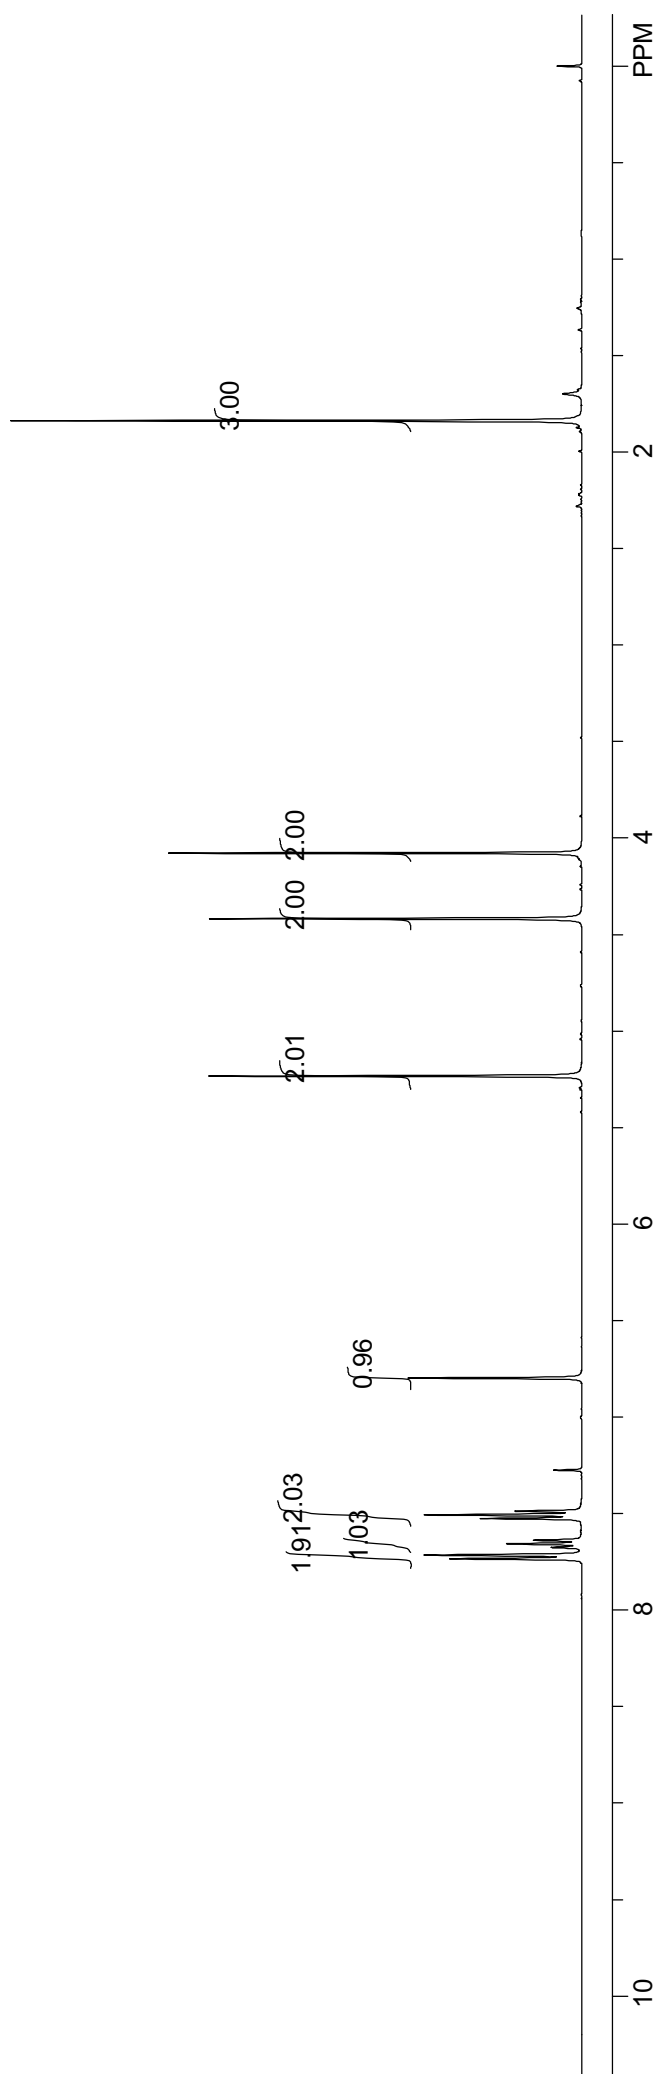

13.399

40.714

55.628

61.736

76.676

77.000

77.320

124.270

128.546

129.093

131.487

133.994

137.065

137.557

138.962

166.869

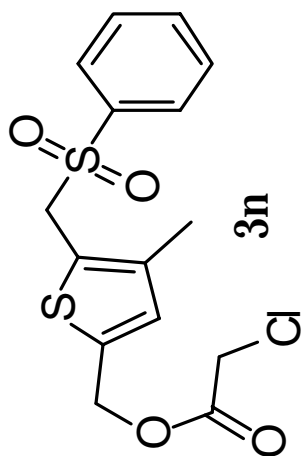

0PPM

50

100

150

200

S40



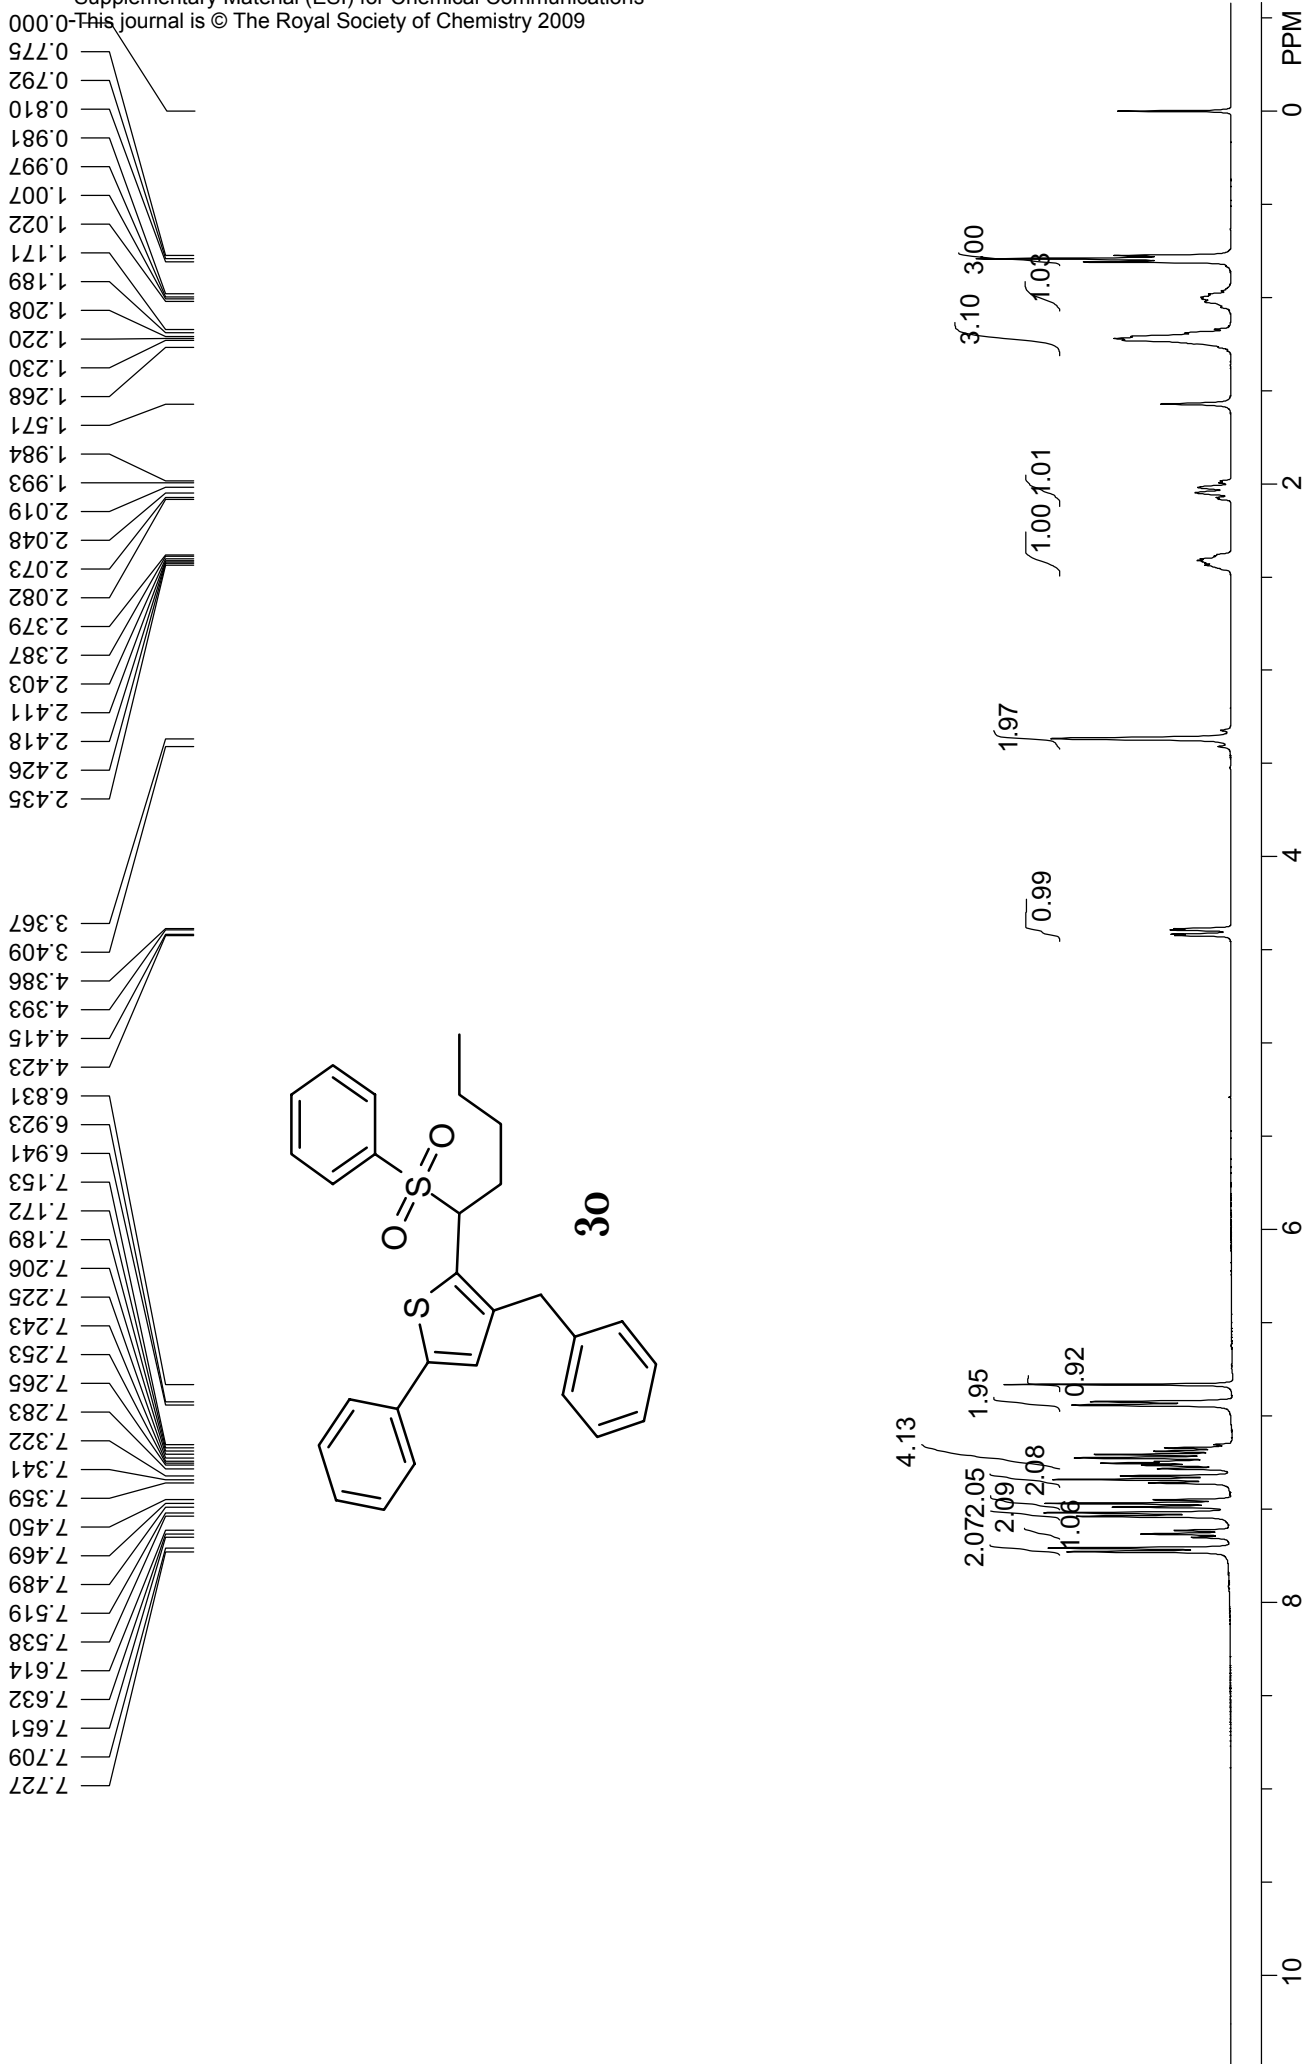

13.581  
22.091  
28.650  
29.129  
33.889

65.306

76.600  
76.925  
77.242

124.844  
125.444  
126.276  
127.761  
128.439  
128.470  
128.763  
128.809  
129.125  
133.616  
133.652  
137.379  
139.327  
143.368  
144.423

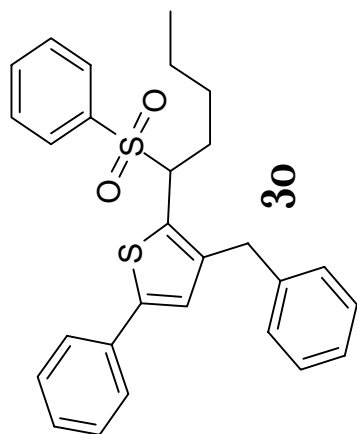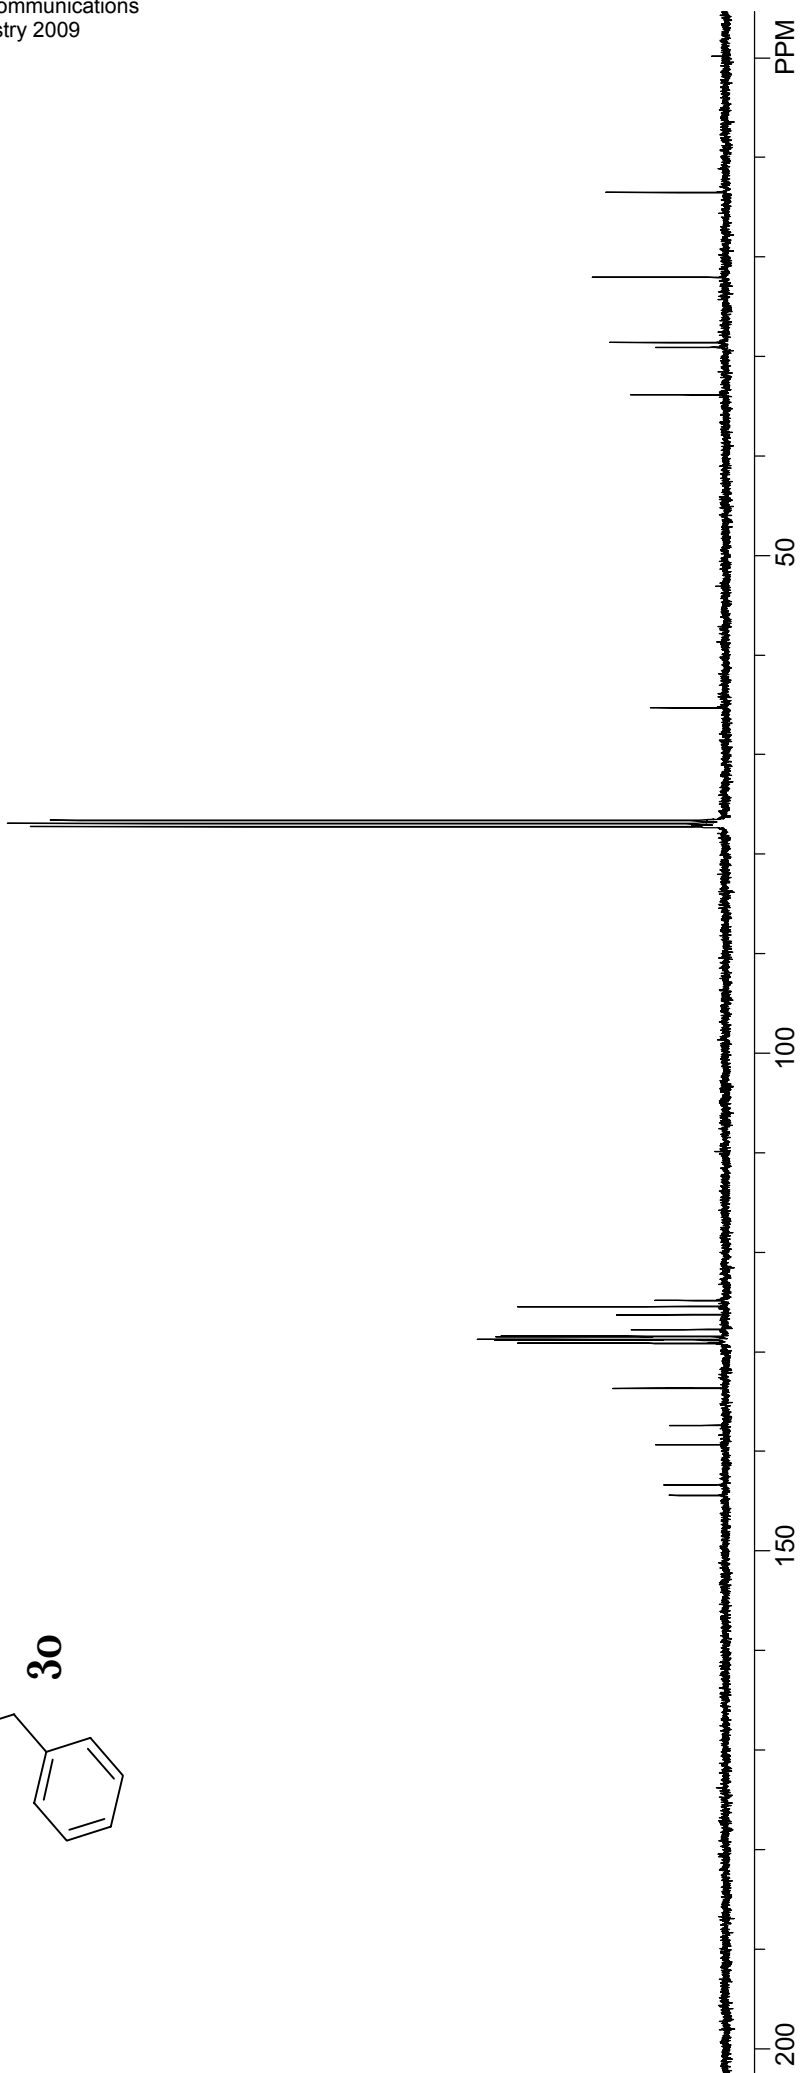

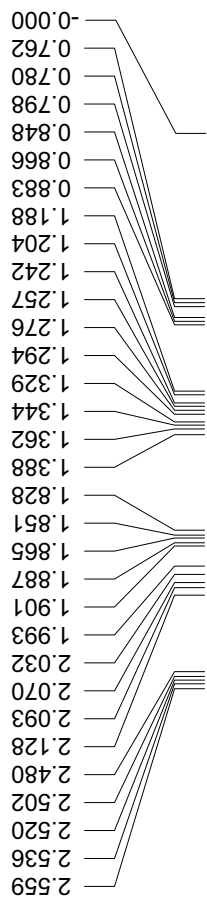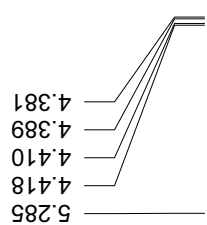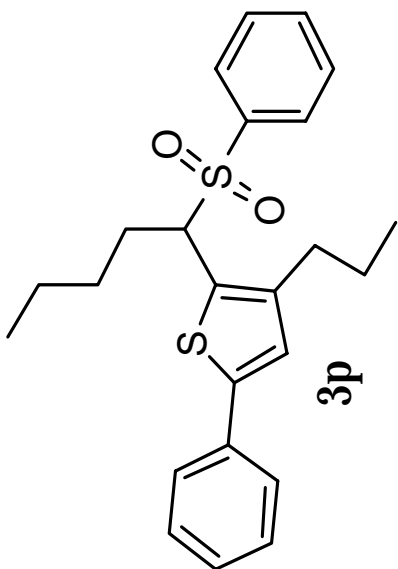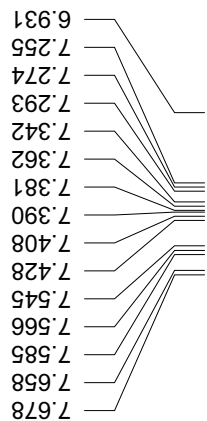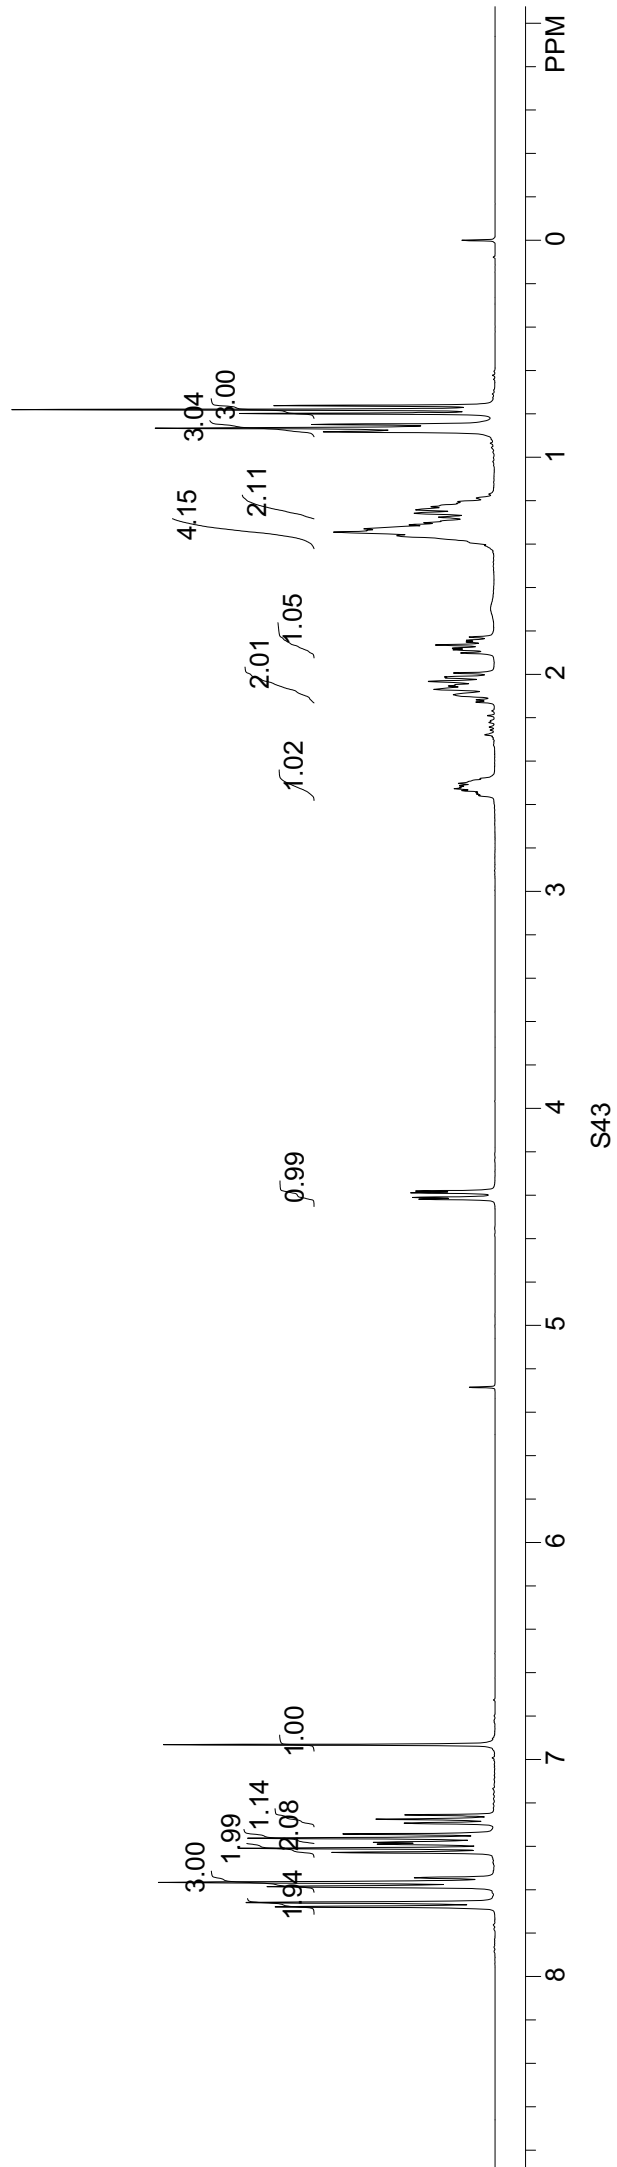

13.690  
13.861  
22.318  
23.253  
28.847  
29.037  
29.955

65.370  
76.721  
77.037  
77.359

123.811  
125.510  
127.744  
128.308  
128.701  
128.861  
129.146  
133.582  
133.906  
137.451  
144.310  
145.183

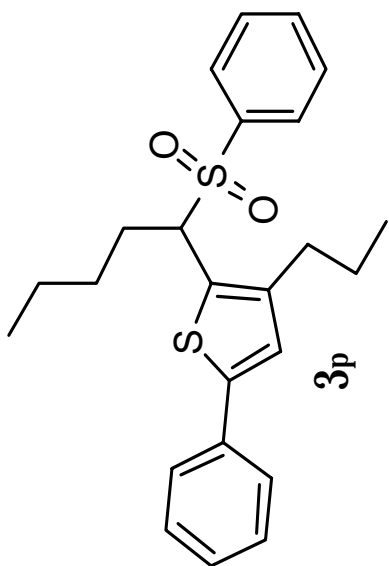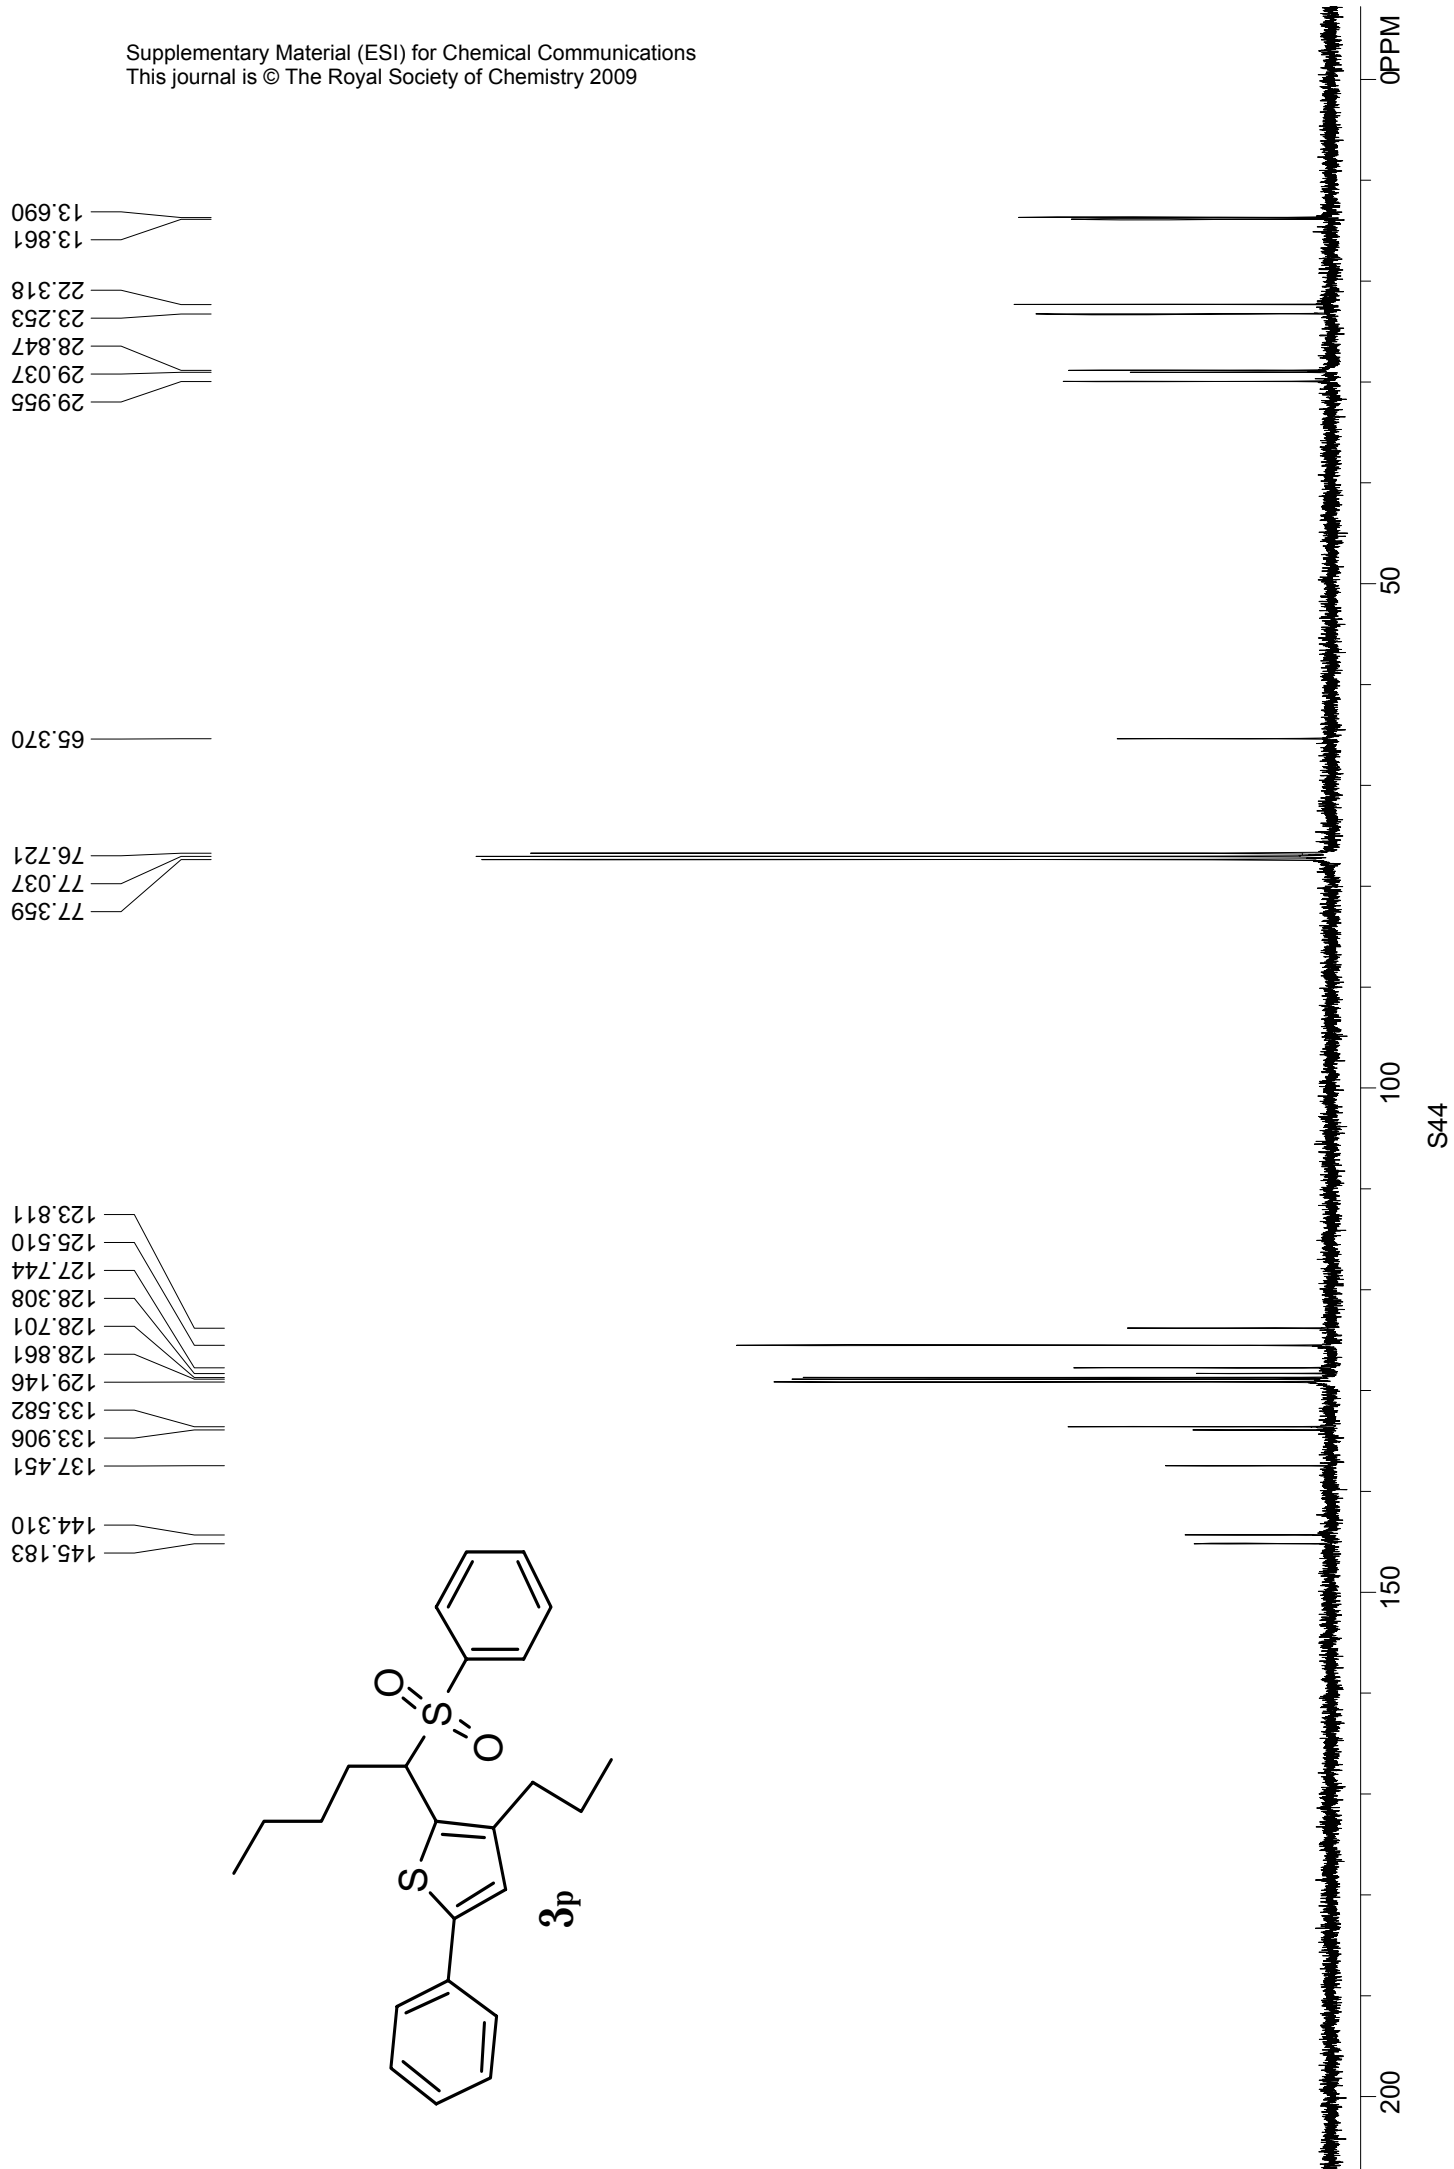

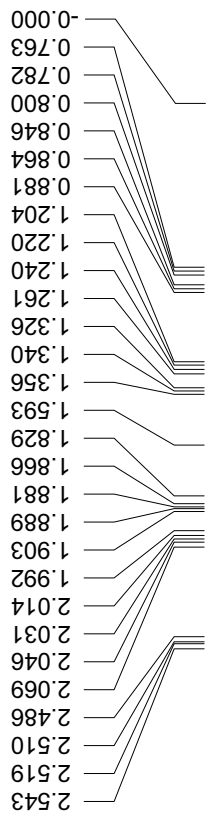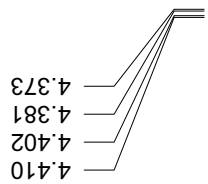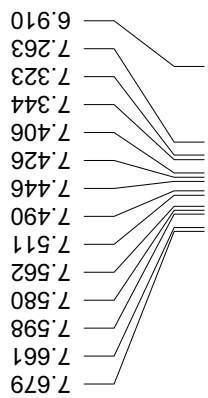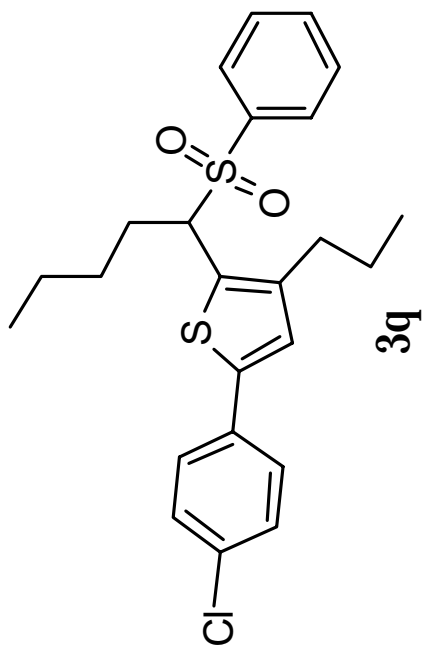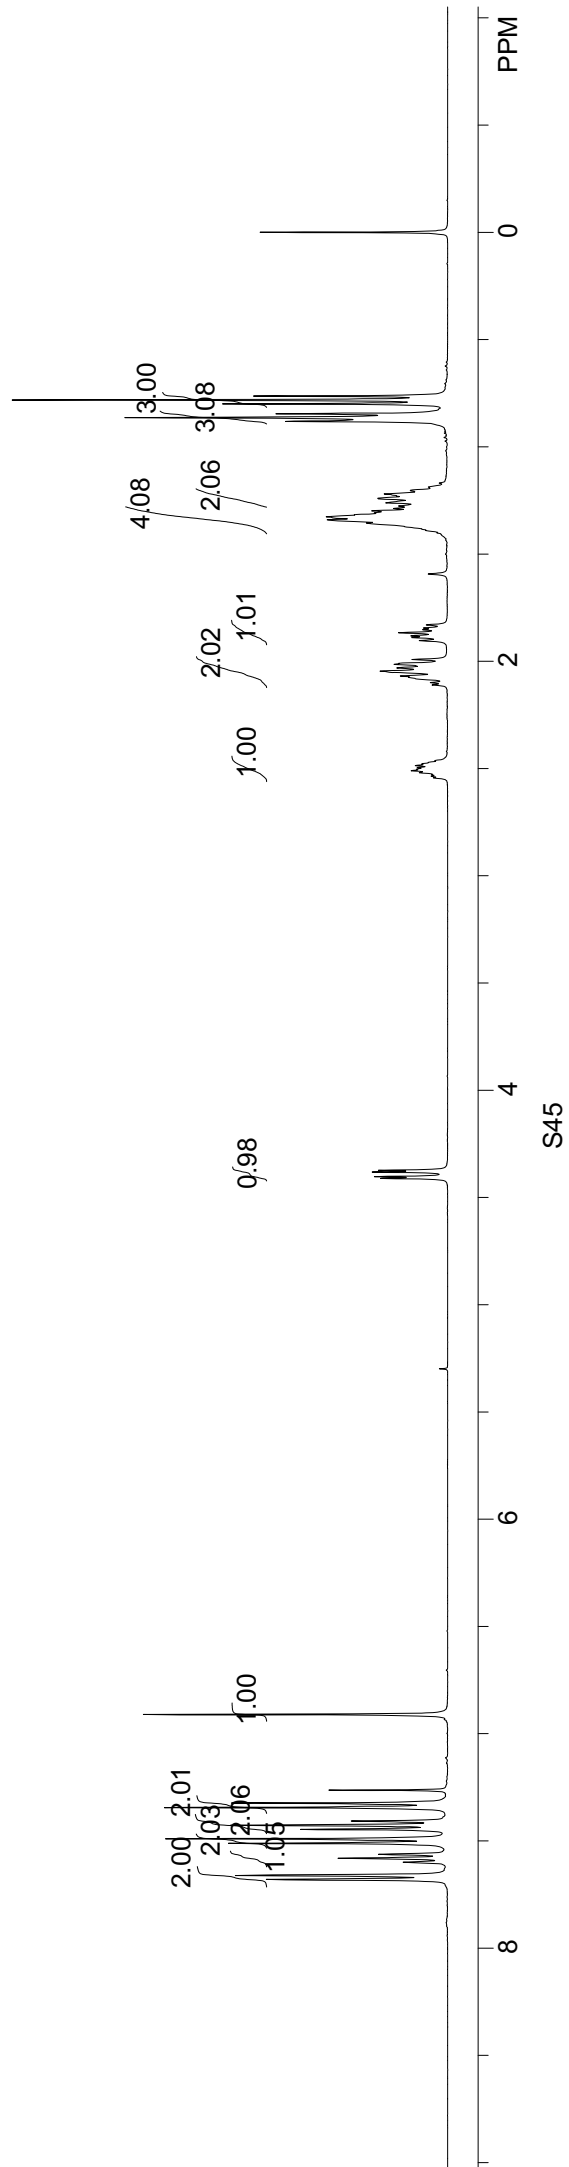

13.655  
13.826  
22.265  
23.218  
28.783  
29.025  
29.886

65.221

76.660  
76.975  
77.286

124.115  
126.651  
128.711  
128.956  
129.068  
132.394  
133.408  
133.605  
137.330  
142.916  
145.301

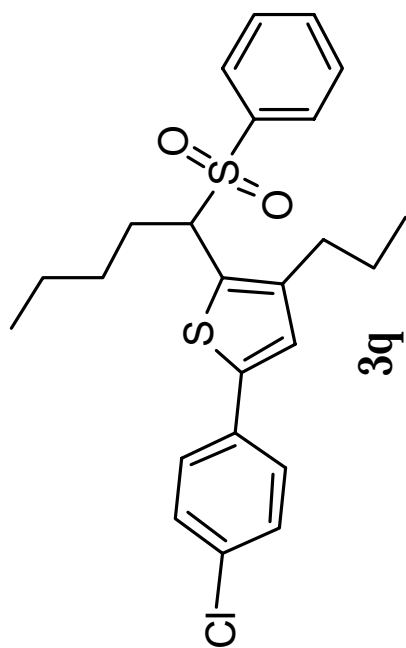

**3c**

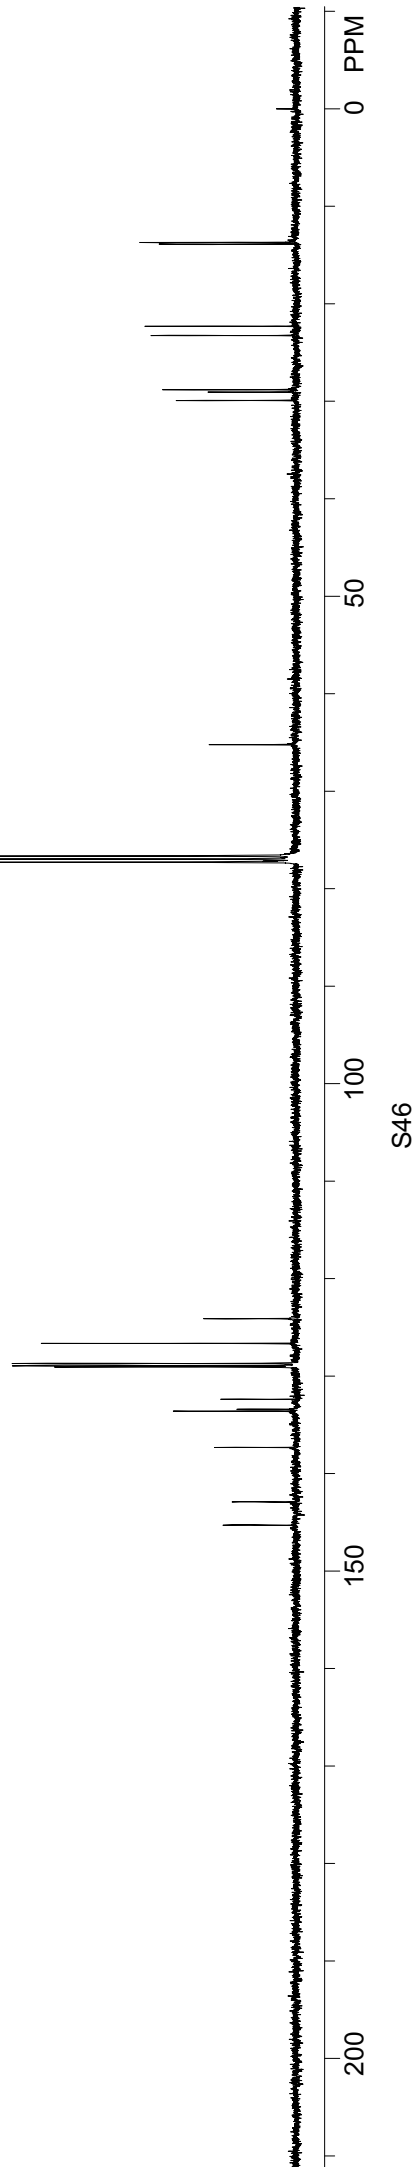

S46

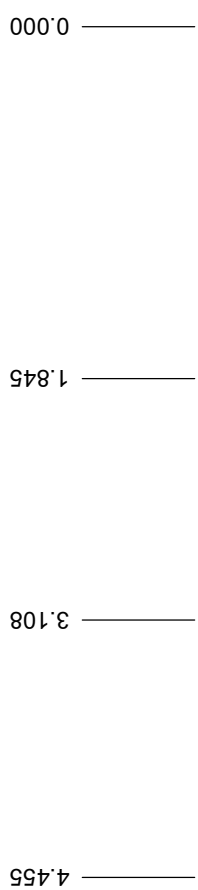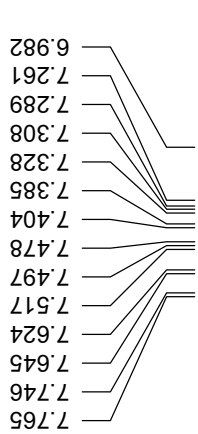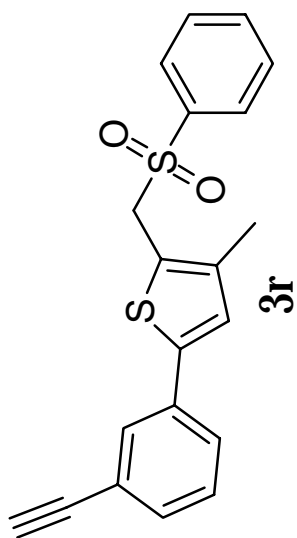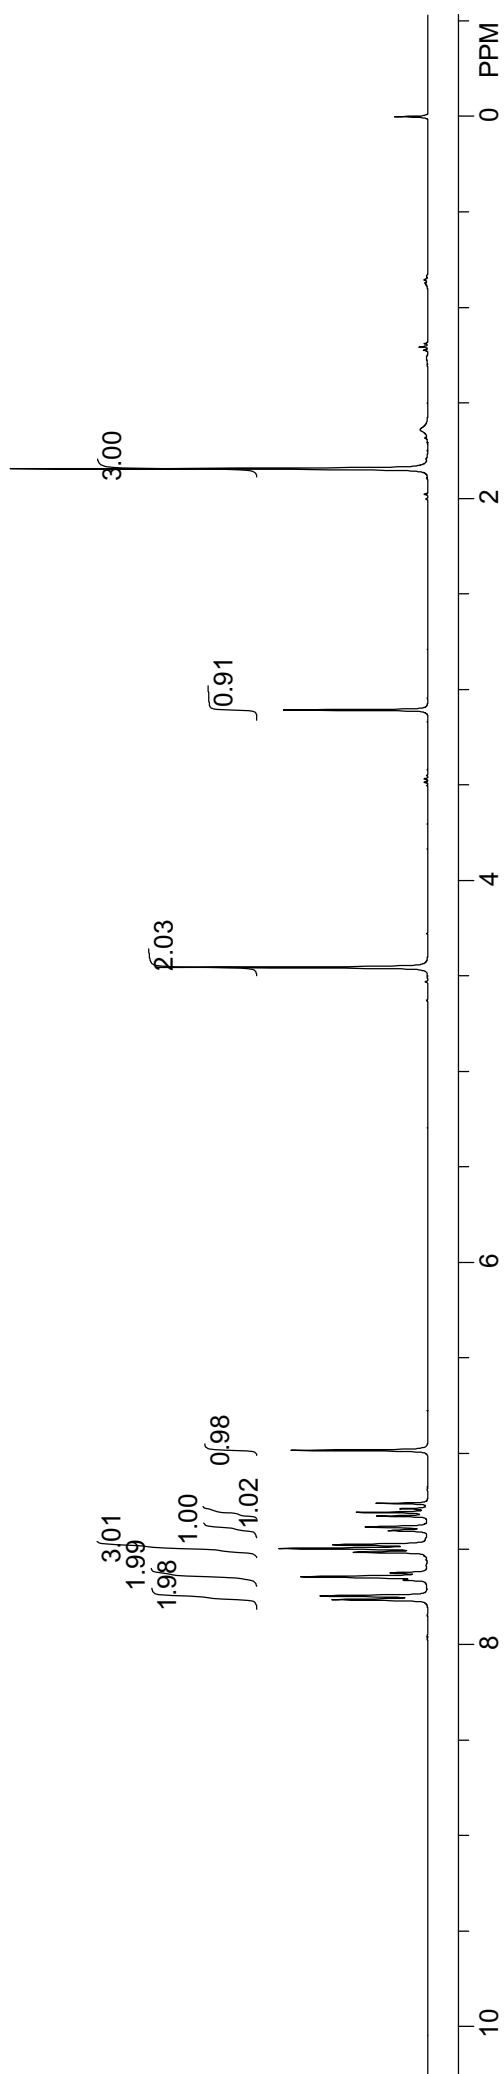

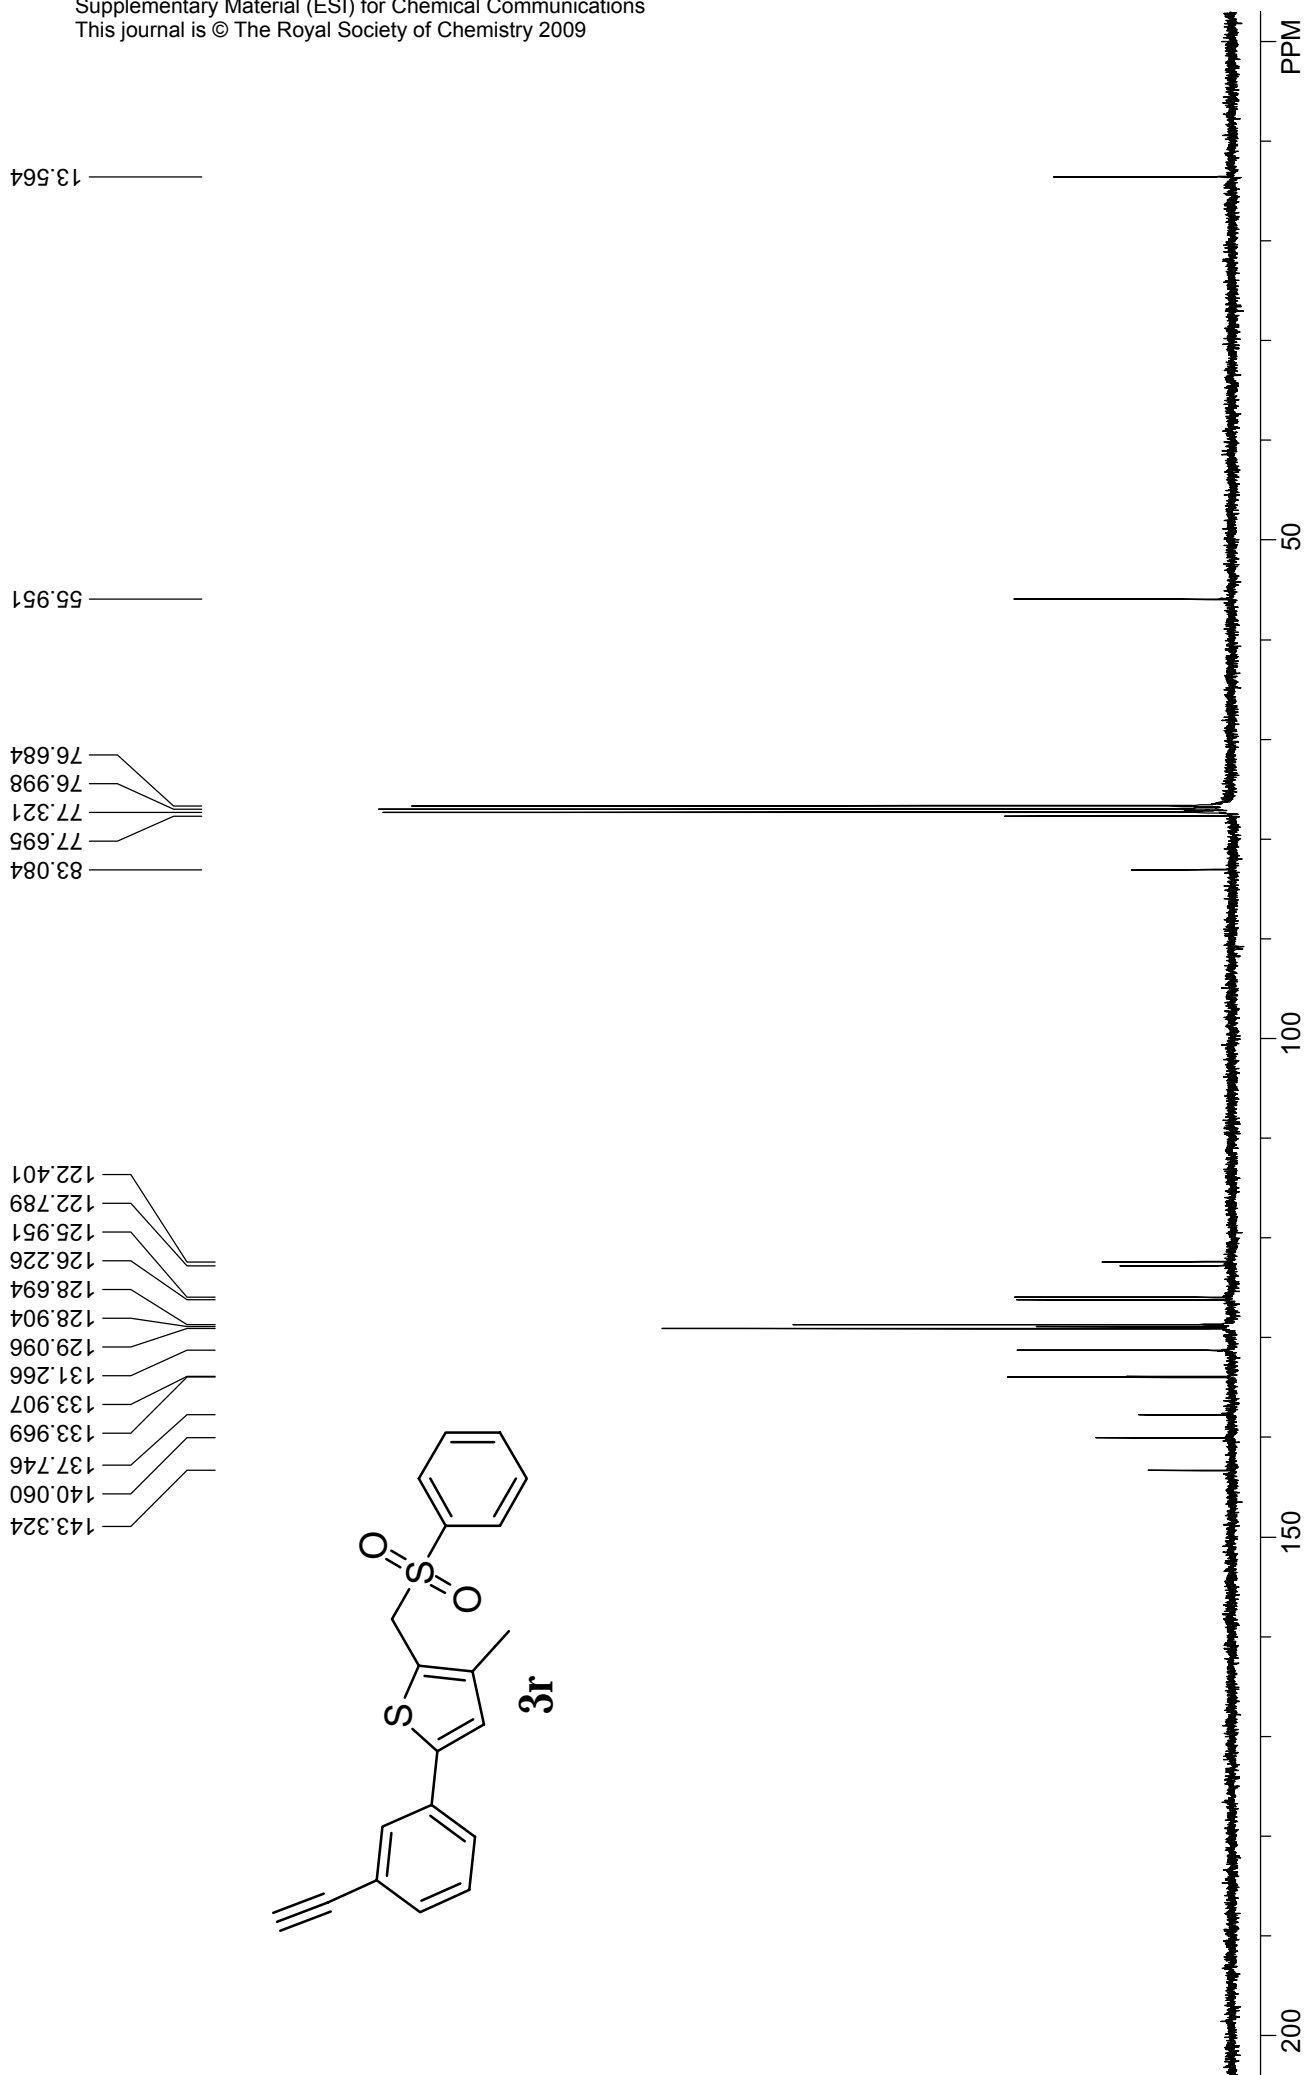



0.000

1.843

4.470

7.778  
7.759  
7.674  
7.657  
7.638  
7.530  
7.511  
7.491  
7.437  
7.420  
7.363  
7.345  
7.261  
7.018

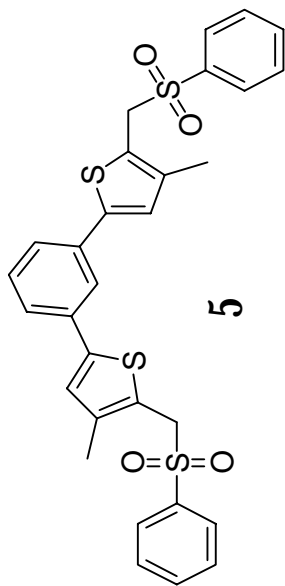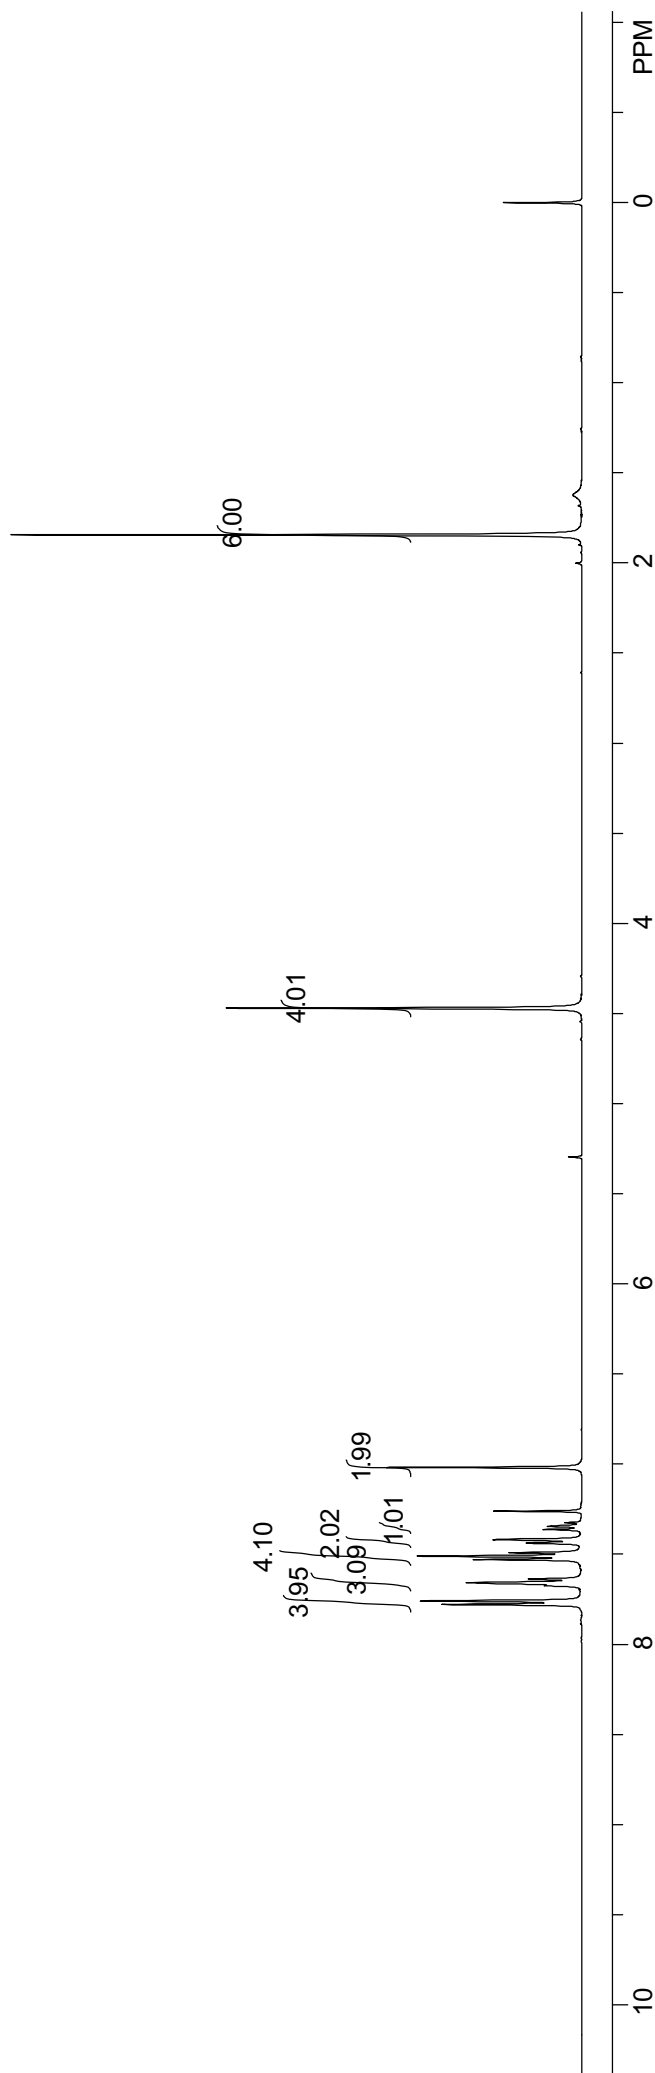

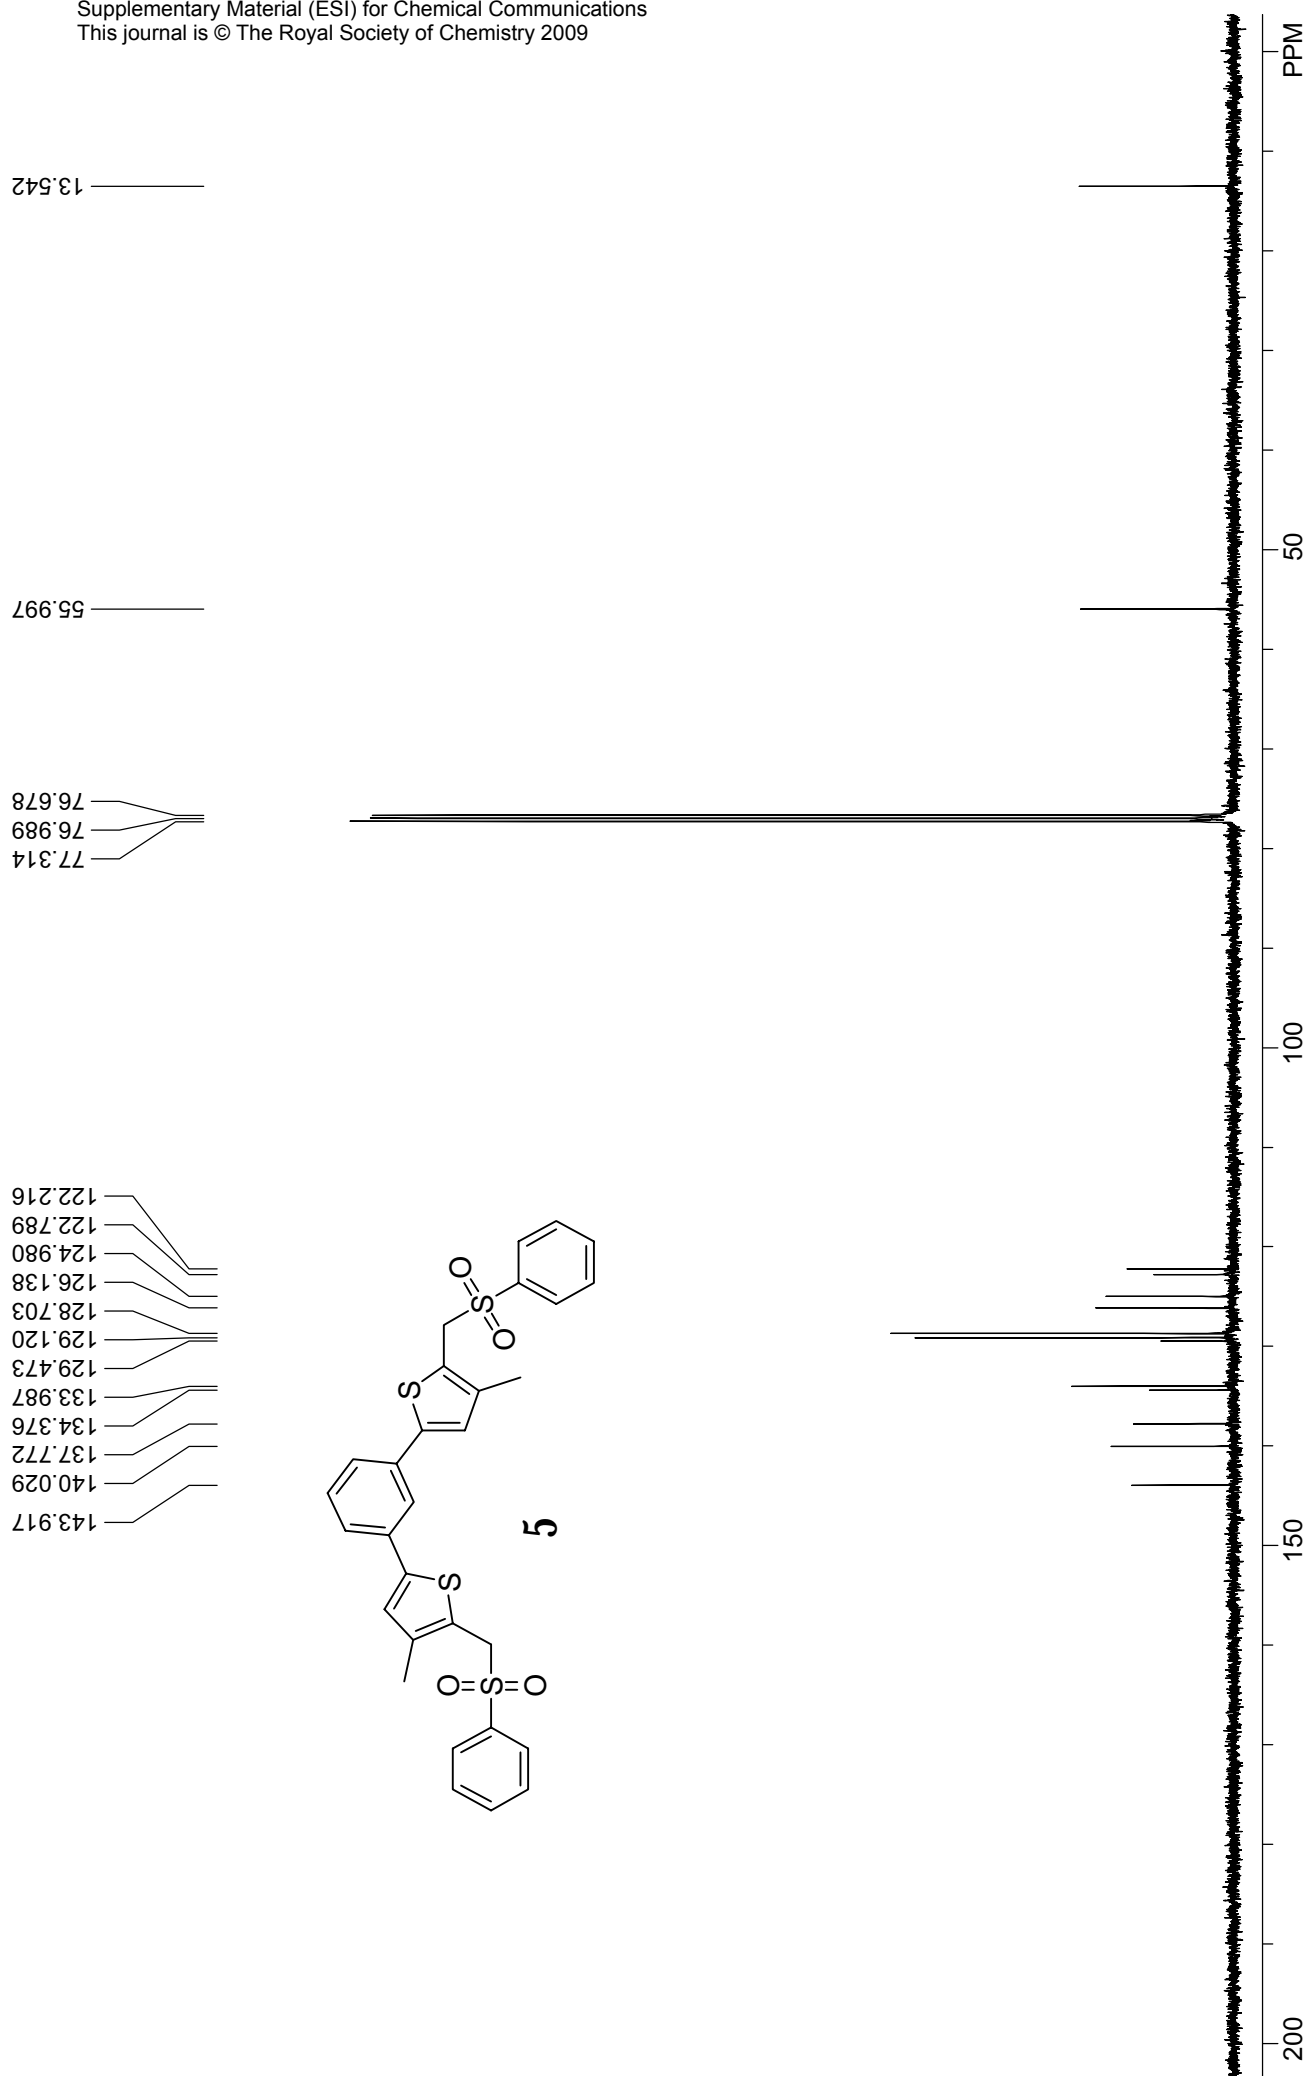

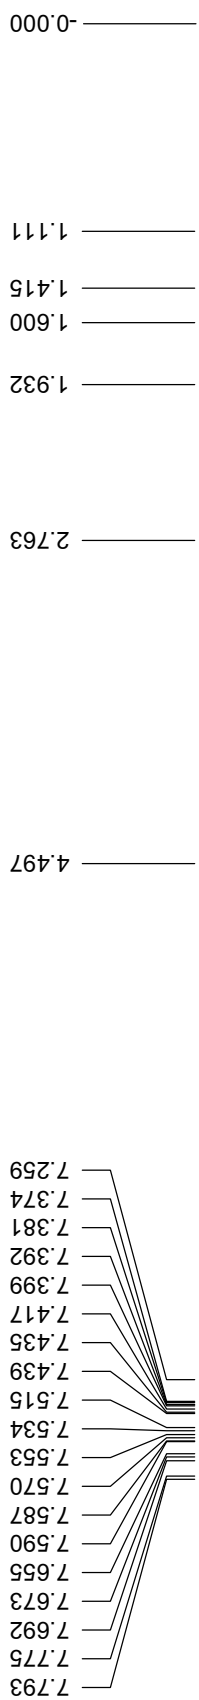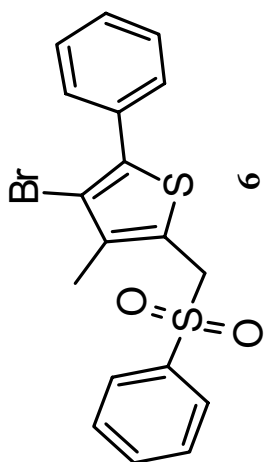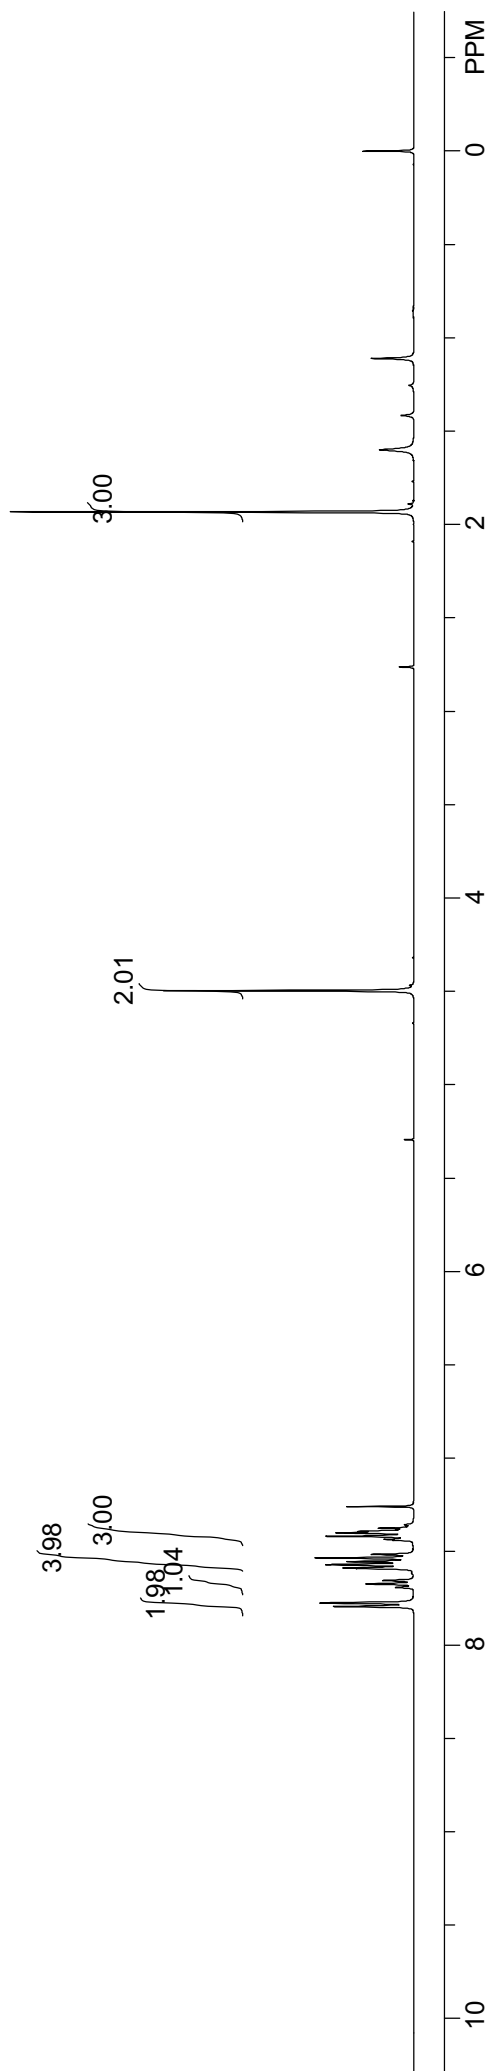

14.662

56.280

76.986  
76.661  
77.303

111.039  
121.809  
128.480  
128.508  
128.674  
129.078  
129.203  
132.673  
134.150  
137.602  
139.106  
139.437

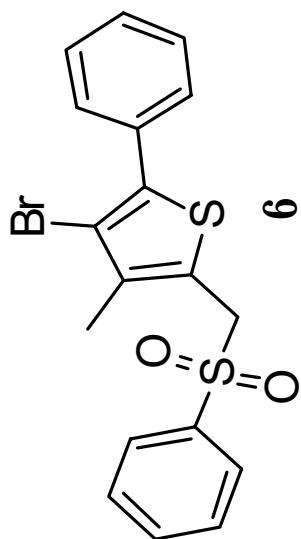

PPM

50

100

150

200

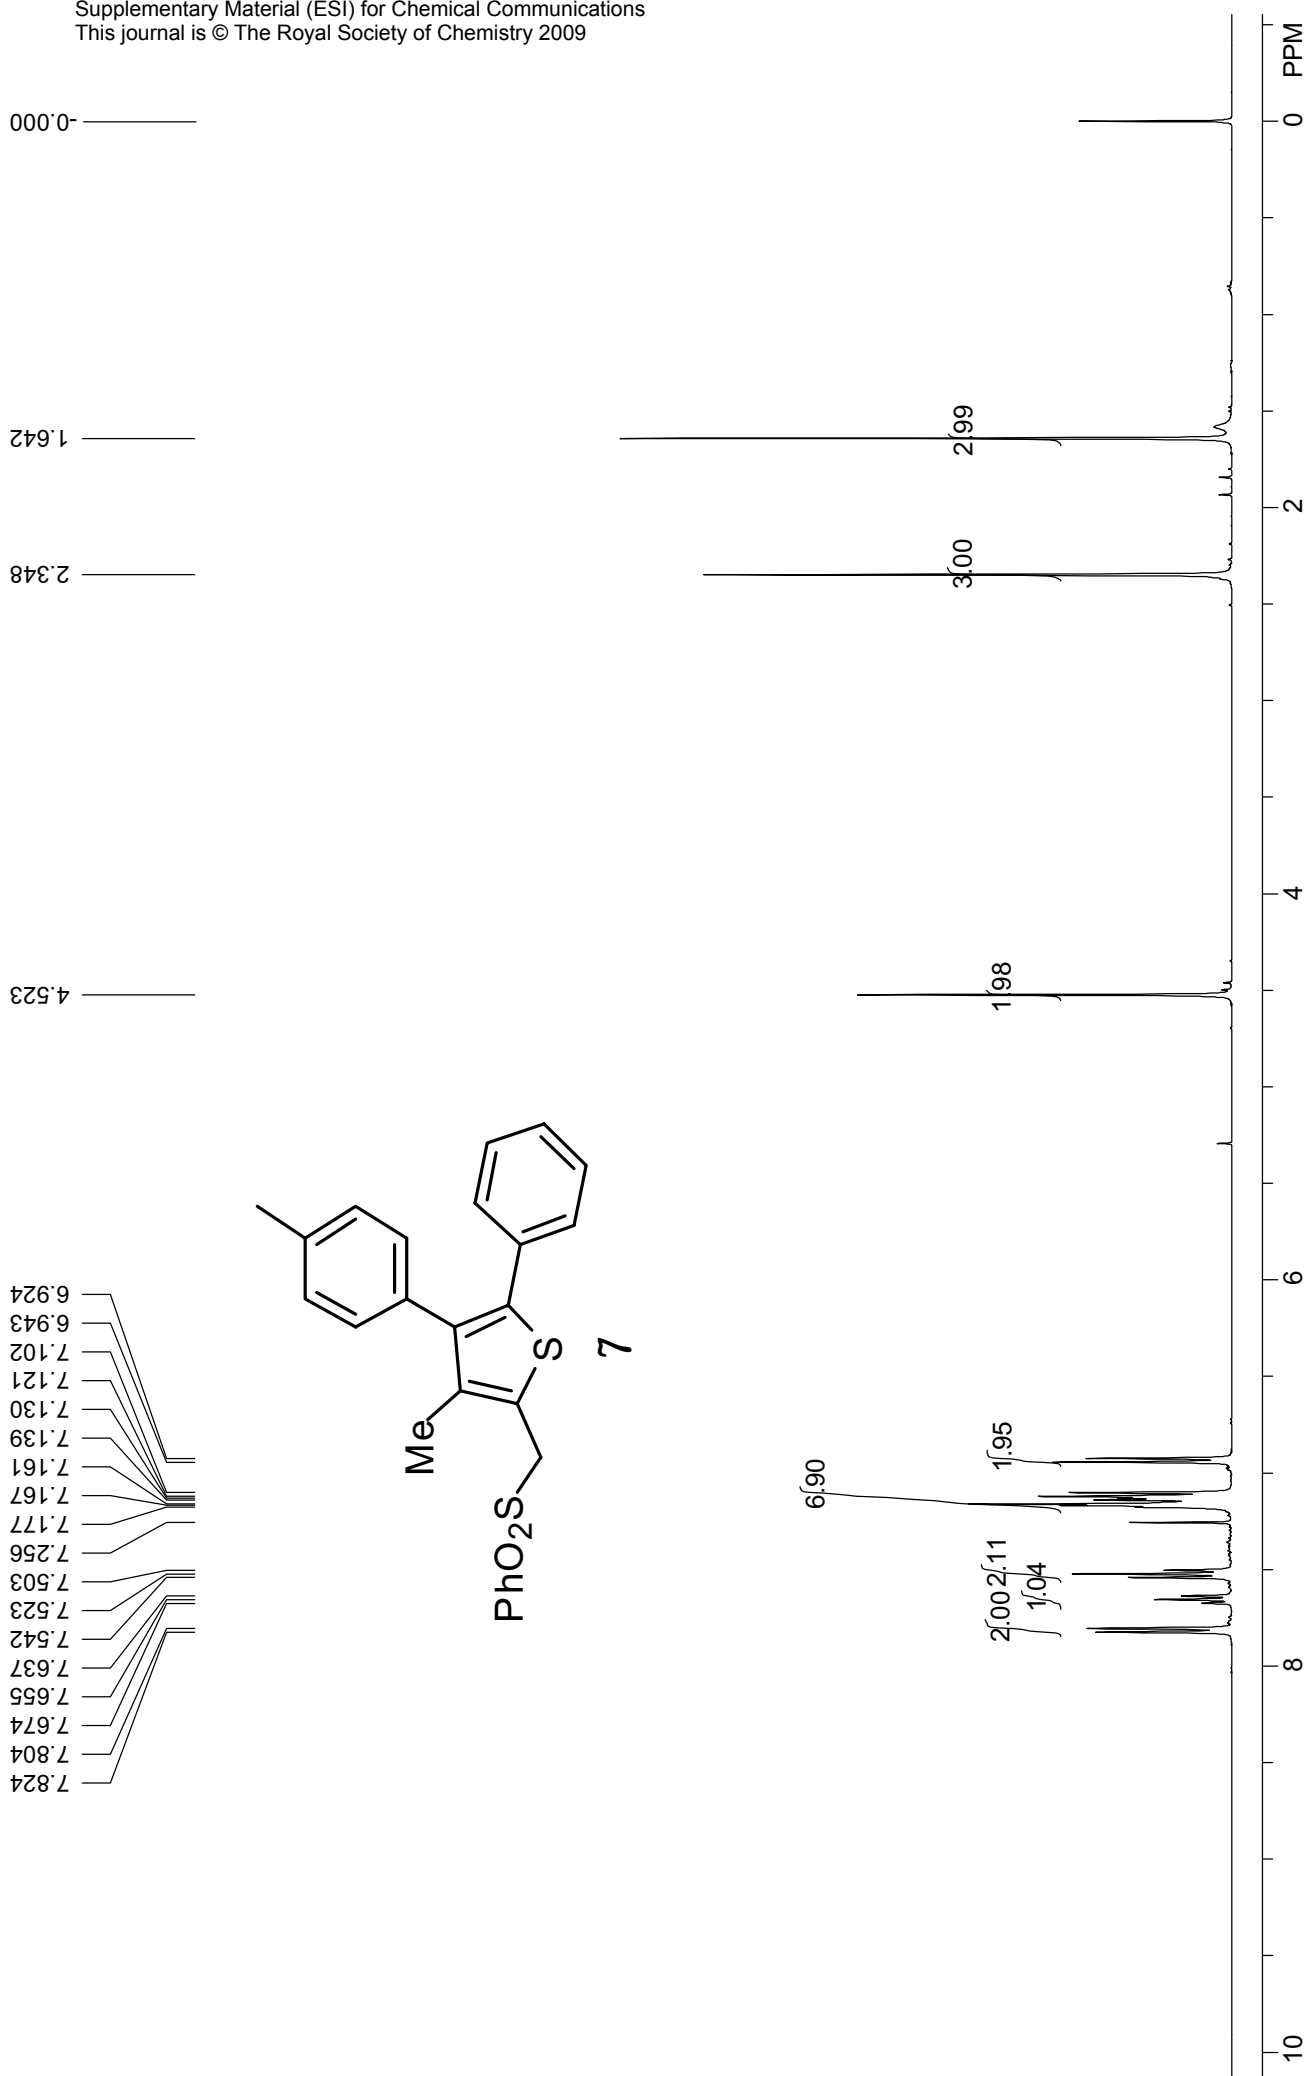

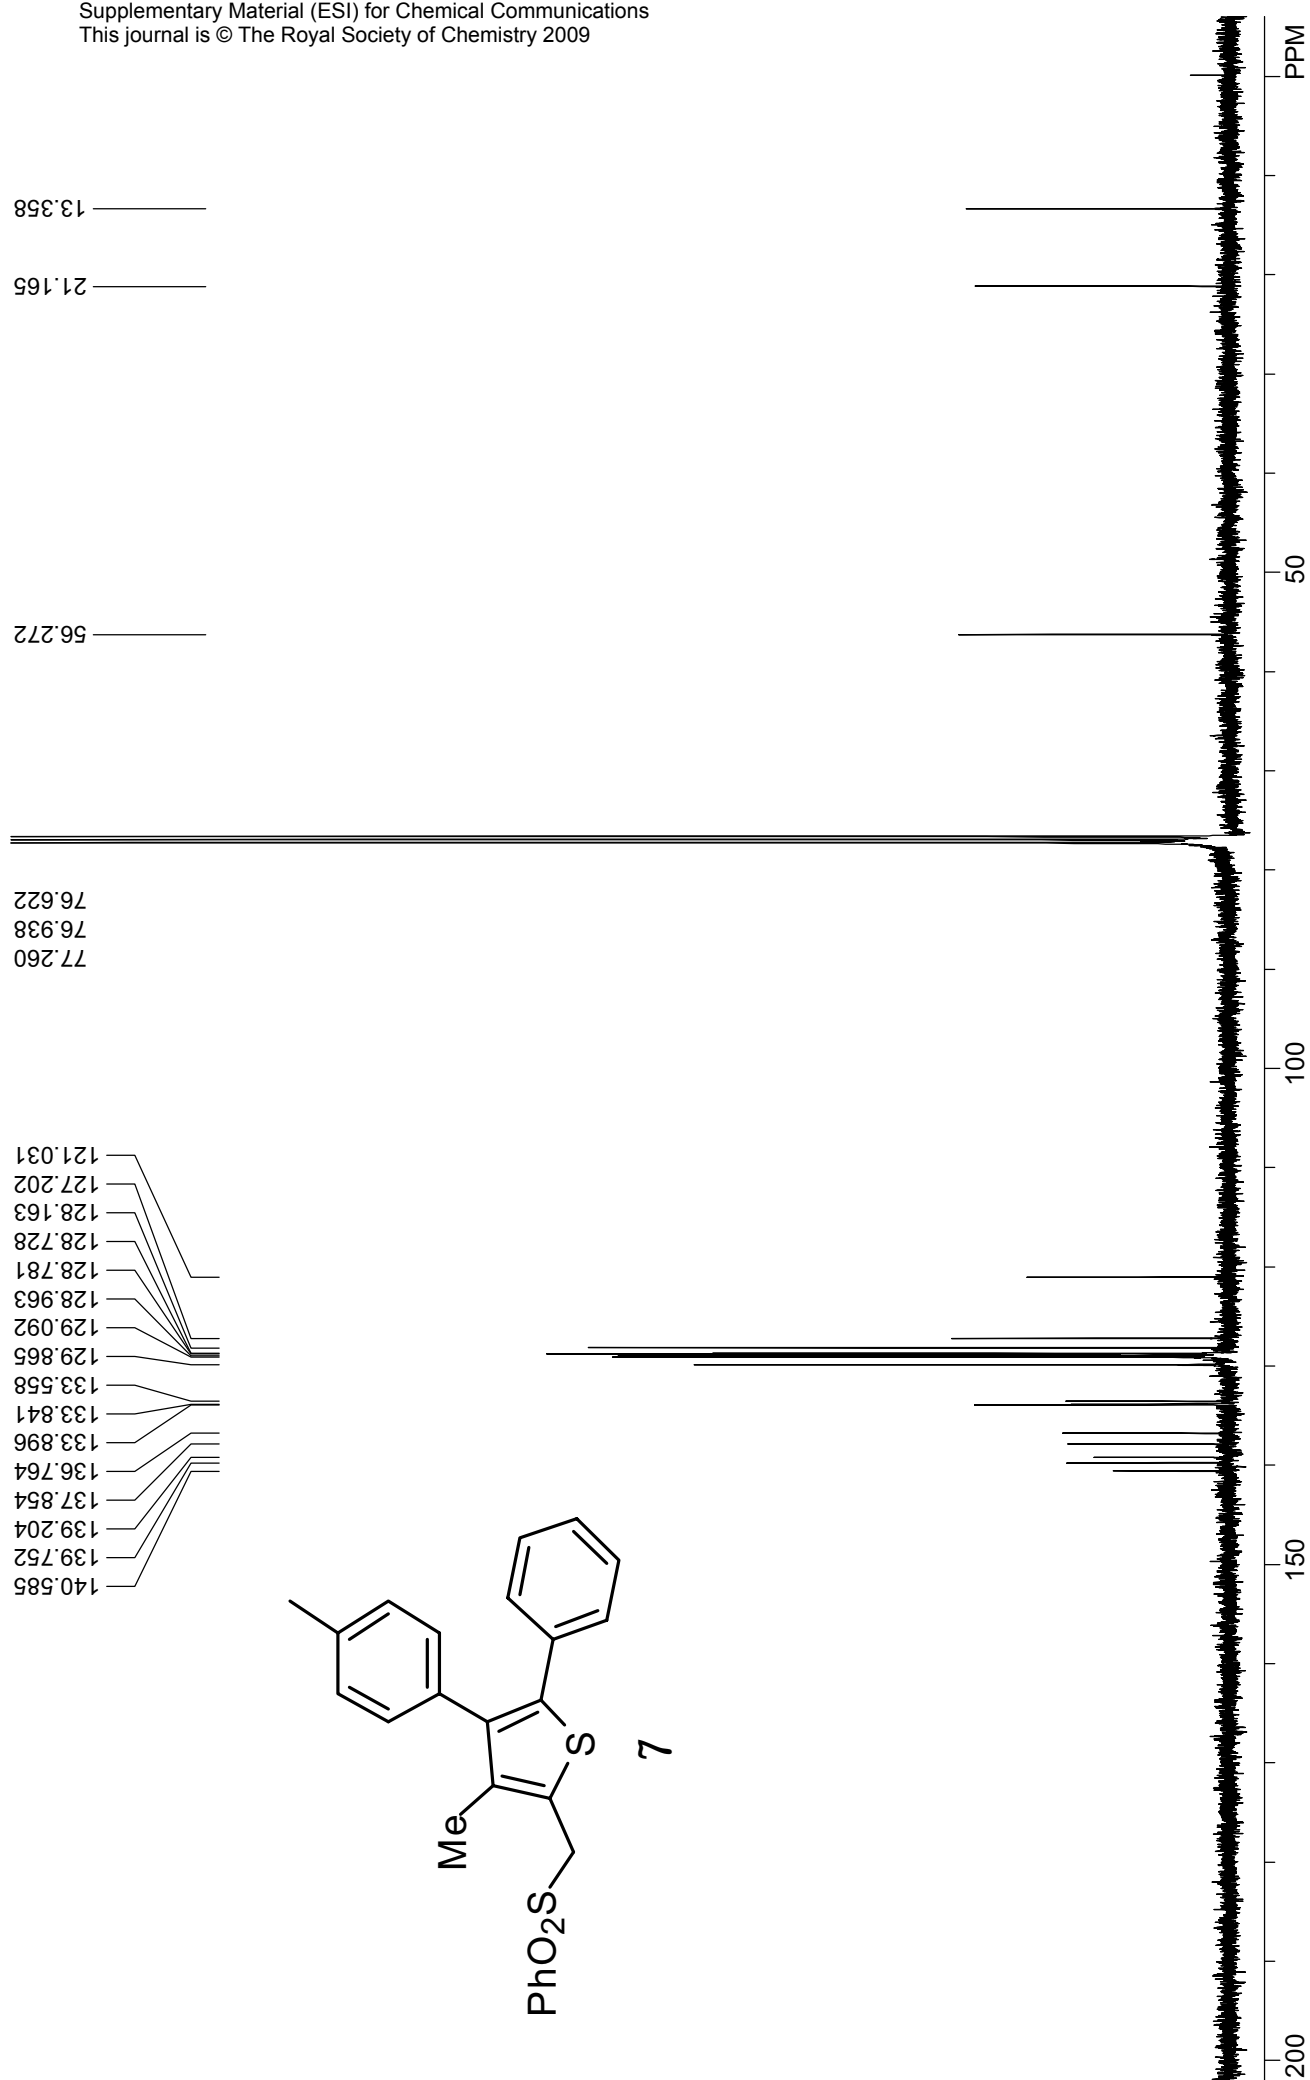

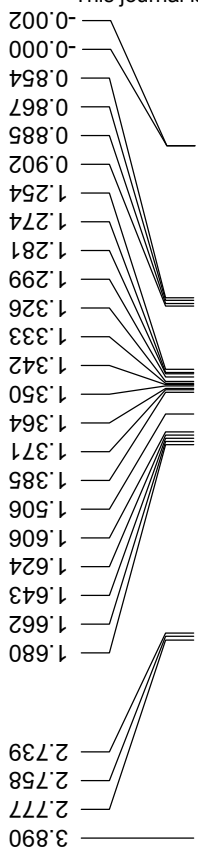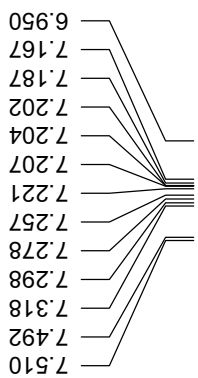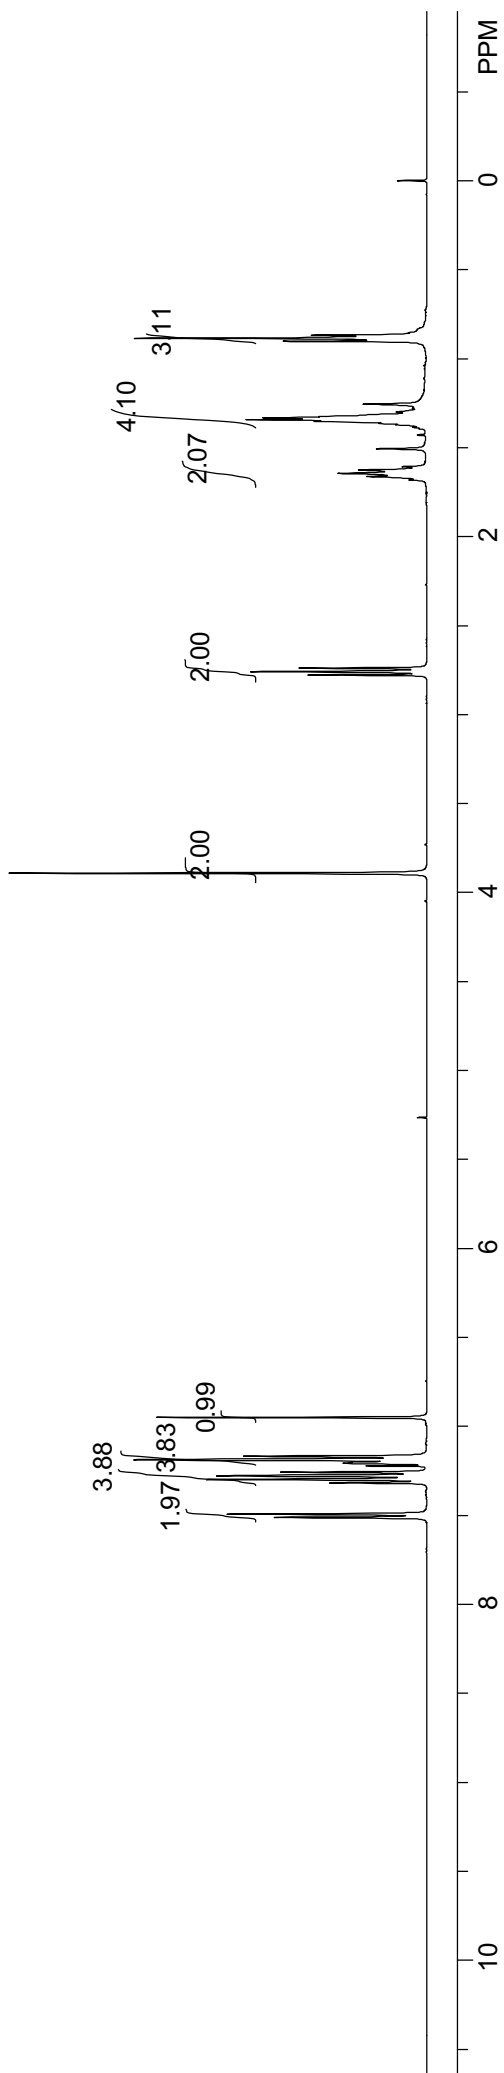

13.985  
22.441  
28.048  
31.394  
31.458  
34.282

76.690  
77.005  
77.317

125.279  
125.351  
125.994  
126.874  
128.423  
128.477  
128.694  
134.577  
136.577  
139.805  
140.003  
140.743

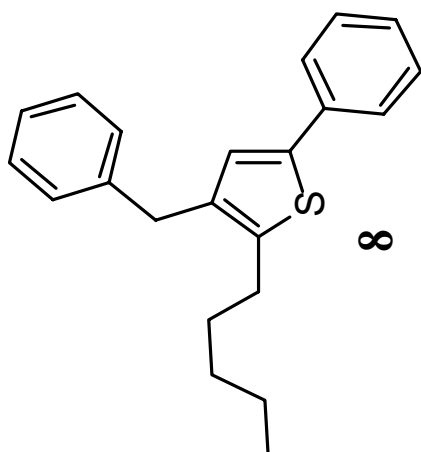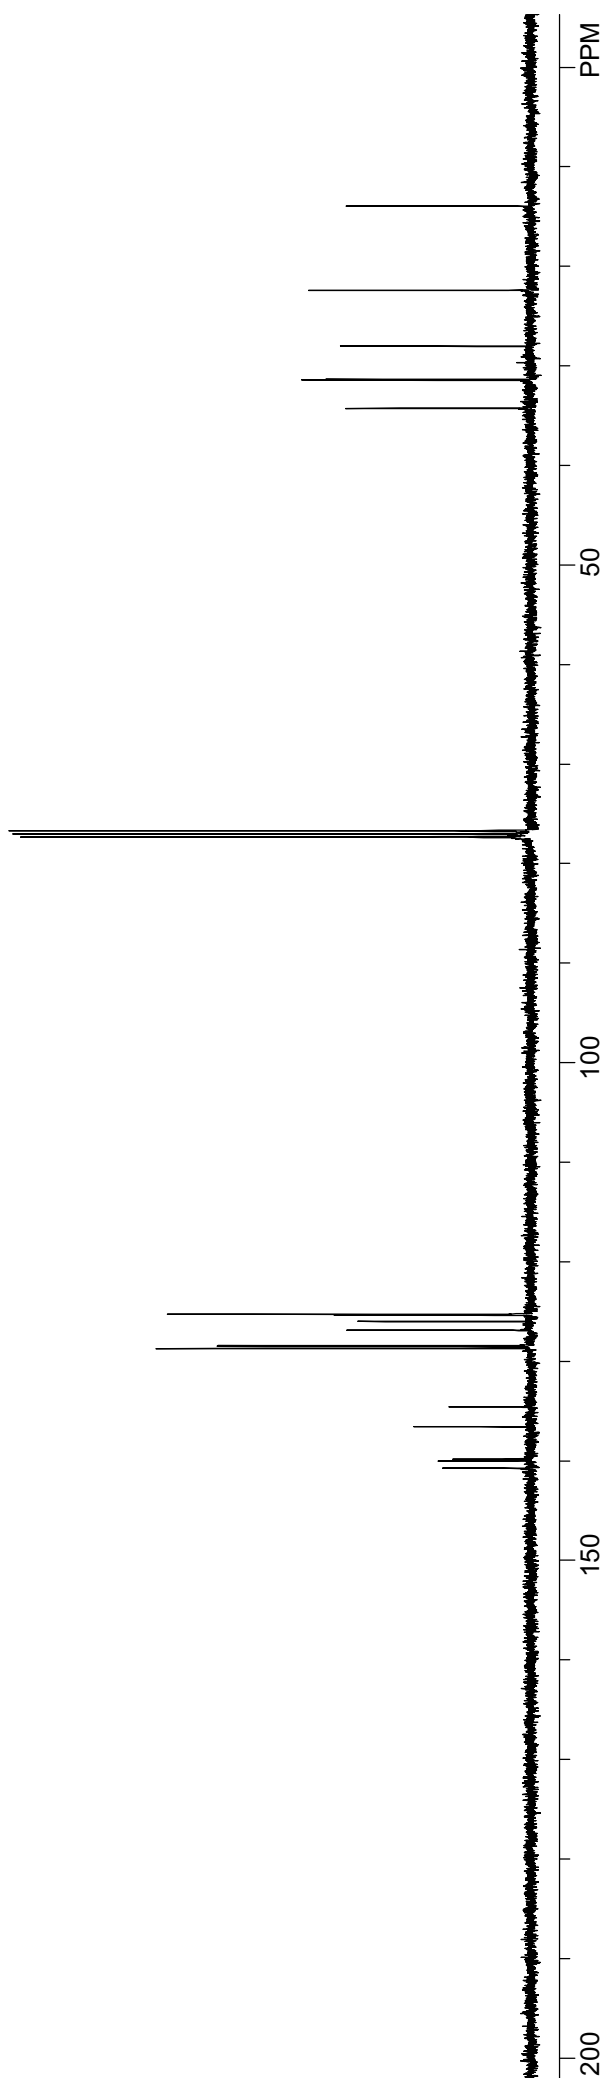

Supplement: b909284f.pdf [file b909284f.pdf]
